# Supplementary material for: Metabolic States Following Accumulation of Intracellular Aggregates: Implications for Neurodegenerative Diseases
Source: PLoS One. 2013 May 7;8(5):e63822. doi: 10.1371/journal.pone.0063822 (PMC3646825; doi:10.1371/journal.pone.0063822)
Supplement: Table S2 — Sensitivity analysis. The metabolic flux predictions are dependent on the choice of kinetic parameters. For each reaction, we determined its flux distribution in 100 kinetic parameter sets or 1,000 parameters sets. This table reports the mean flux of each reaction over 100 kinetic parameter sets and the probability that the flux distribution as obtained using 100 kinetic parameters is different from that using 1,000 kinetic parameters. Values above 0.05 indicate that the null hypothesis is correct, i.e. the distributions are similar and, therefore, 100 kinetic parameter sets is sufficient. (XLS) [file pone.0063822.s002.xls]

## Sheet: Sheet1
				fATP=25		fATP=44		fATP=64		fATP=83		fATP=103				fATP=25	fATP=44	fATP=64	fATP=83	fATP=103
Index	Bigg label	Reaction name	Reaction	Mean flux	P-value	Mean flux	P-value	Mean flux	P-value	Mean flux	P-value	Mean flux	P-value			Count	Count	Count	Count	Count
1	EX_glc(e)	D-Glucose exchange	<==> glc-D[c]	2.00241	0.0214368	8.71805	0.146481	16.6867	0.370047	27.4093	0.617817	39.2423	0.722165		P-value<0.005	0	0	0	0	0
2	EX_ala-L(e)	L-Alanine exchange	<==> ala-L[c]	0	1	-0.0074325	1	-0.301349	0.999995	-0.963438	0.998849	-0.977882	0.999994
3	EX_arg-L(e)	L-Arginine exchange	<==> arg-L[c]	0	1	0	1	0	1	0	1	0	1
4	EX_asn-L(e)	L-Asparagine exchange	<==> asn-L[c]	0	1	0	1	0	1	0	1	0	1
5	EX_asp-L(e)	L-Aspartate exchange	<==> asp-L[c]	0	1	0	1	-0.0399541	1	-0.163168	1	-0.216356	1
6	EX_cys-L(e)	L-Cysteine exchange	<==> cys-L[c]	0	1	0	1	0	1	0	1	0	1
7	EX_glu-L(e)	L-Glutamate exchange	<==> glu-L[c]	0	1	0	1	-0.220459	1	-1.42505	1	-3.40573	0.924562
8	EX_gln-L(e)	L-Glutamine exchange	<==> gln-L[c]	0	1	0	1	0	1	0	1	0	1
9	EX_gly(e)	Glycine exchange	<==> gly[c]	0	1	0	1	-0.050578	1	-0.155132	1	-0.226804	0.99717
10	EX_orn(e)	Ornithine exchange	<==> orn[c]	0	1	0	1	0	1	0	1	0	1
11	EX_pro-L(e)	L-Proline exchange	<==> pro-L[c]	0	1	0	1	0	1	0	1	0	1
12	EX_ser-L(e)	L-Serine exchange	<==> ser-L[c]	0	1	0	1	0	1	0	1	0	1
13	EX_tyr-L(e)	L-Tyrosine exchange	<==> tyr-L[c]	0	1	0	1	0	1	0	1	0	1
14	EX_his-L(e)	L-Histidine exchange	<==> his-L[c]	0.603149	0.123654	0.7733	0.570507	1.60352	0.521046	3.94909	0.98976	6.22507	0.926721
15	EX_ile-L(e)	L-Isoleucine exchange	<==> ile-L[c]	0.0260281	0.107625	0.0330325	0.570507	0.036911	0.290325	0.0375829	1	0.0376613	1
16	EX_leu-L(e)	L-Leucine exchange	<==> leu-L[c]	0.0453082	0.107625	0.0575011	0.570507	0.0642525	0.290325	0.0654221	1	0.0655585	1
17	EX_lys-L(e)	L-Lysine exchange	<==> lys-L[c]	0.0457902	0.107625	0.0581128	0.570507	0.0667966	0.290325	0.0700348	1	0.0713486	1
18	EX_met-L(e)	L-Methionine exchange	<==> met-L[c]	0.0227344	0.107625	0.0288525	0.570507	0.0322399	0.290325	0.0328268	1	0.0328952	1
19	EX_phe-L(e)	L-Phenylalanine exchange	<==> phe-L[c]	0.0322138	0.107625	0.0408828	0.570507	0.0457684	0.290325	0.0473042	1	0.046611	1
20	EX_thr-L(e)	L-Threonine exchange	<==> thr-L[c]	0.0310088	0.107625	0.0393535	0.570507	0.0439738	0.290325	0.199959	1	0.0448674	1
21	EX_trp-L(e)	L-Tryptophan exchange	<==> trp-L[c]	0.00353467	0.112766	0.00448593	0.570507	0.00501283	0.301937	0.00510417	1	0.0051148	1
22	EX_val-L(e)	L-Valine exchange	<==> val-L[c]	0.0368828	0.123485	0.0465589	0.462123	0.0521841	0.268061	0.04993	1	0.0527851	1
23	EX_chol(e)	Choline exchange	<==> chol[c]	0	1	0	1	0	1	0	1	0	1
24	EX_chsterol(e)	Cholesterol exchange	<==> chsterol[c]	0	1	0	1	0	1	0	1	0	1
25	EX_hdca(e)	Hexadecanoate (n-C16:0) exchange	<==> hdca[c]	0	1	0	1	0	1	0	1	0	1
26	EX_h2o(e)	H2O exchange	<==> h2o[c]	-16.6797	0.327002	-24.3481	0.117574	-30.8335	0.138897	-40.5171	0.727666	-54.0203	0.989065
27	EX_pi(e)	Phosphate exchange	<==> pi[c]	26.8941	0.107625	47.0154	0.570507	66.8564	0.290325	86.4101	1	105.911	1
28	EX_h(e)	H+ exchange	<==> h[c]	9.42971	0.803212	9.14024	0.835787	8.52018	0.898762	5.81793	0.82273	3.67604	0.976533
29	EX_o2(e)	O2 exchange	<==> o2[c]	29.3131	0.106871	38.0735	0.368423	40.8794	0.617928	35.8975	0.762947	28.5523	0.97111
30	EX_co2(e)	CO2 exchange	<==> co2[c]	-21.6519	0.449896	-26.5666	0.894078	-27.1181	0.488547	-21.9727	0.890079	-16.0266	0.576982
31	EX_k(e)	K+ exchange	<==> k[c]	0	1	0	1	0	1	0	1	0	1
32	EX_na1(e)	Sodium exchange	<==> na1[c]	0	1	0	1	0	1	0	1	0	1
33	EX_ca2(e)	Calcium exchange	<==> ca2[c]	0	1	0	1	0	1	0	1	0	1
34	EX_fe2(e)	Fe2+ exchange	<==> fe2[c]	0	1	0	1	0	1	0	1	0	1
35	EX_fe3(e)	Fe3+ exchange	<==> fe3[c]	0	1	0	1	0	1	0	1	0	1
36	EX_nh4(e)	Ammonia exchange	<==> nh4[c]	-1.1384	0.123654	-1.46321	0.570507	-3.111	0.521046	-7.9502	0.986127	-12.3644	0.926721
37	EX_urea(e)	Urea exchange	<==> urea[c]	0	1	0	1	0	1	0	1	0	1
38	EX_hco3(e)	Bicarbonate exchange	<==> hco3[c]	-9.63502	0.685936	-10.7182	0.68097	-10.602	0.896166	-9.47544	0.738352	-7.53674	0.667639
39	EX_so4(e)	Sulfate exchange	<==> so4[c]	0	1	0	1	0	1	0	1	0	1
40	EX_for(e)	Formate exchange	--> for[c]	0.370341	1	0.205057	1	0.0721142	1	0.214149	1	0.411233	1
41	EX_dhf(e)	7,8-Dihydrofolate exchange	--> dhf[c]	7.47851	0.951814	12.1453	0.997295	15.1989	0.999995	14.9834	1	14.7147	0.999992
42	EX_lac-L(e)	L-Lactate exchange	lac-L[c] -->	-22.9385	0.0161365	-14.4945	0.038842	-2.0182	0.178609	12.8122	0.916645	26.3742	0.981294
43	EX_for(e)	Formate exchange	for[c] -->	14.9071	0.414657	27.3154	0.219097	34.4353	0.625603	32.1701	0.282203	27.6813	0.844869
44	EX_dhf(e)	7,8-Dihydrofolate exchange	dhf[c] -->	0	1	0	1	0	1	0	1	0	1
45	EX_thymd(e)	Thymidine exchange	thymd[c] -->	0	1	0	1	0	1	0	1	0	1
46	EX_arab-L(e)	L-Arabinose exchange	arab-L[c] -->	0	1	0	1	0	1	0	1	0	1
47	EX_fru(e)	D-Fructose exchange	fru[c] -->	0	1	0	1	0	1	0	1	0	1
48	EX_gal(e)	D-Galactose exchange	gal[c] -->	0	1	0	1	0	1	0	1	0	1
49	EX_xyl-D(e)	D-Xylose exchange	xyl-D[c] -->	0	1	0	1	0	1	0	1	0	1
50	EX_acgam(e)	N-Acetyl-D-glucosamine exchange	acgam[c] -->	0	1	0	1	0	1	0	1	0	1
51	EX_cit(e)	Citrate exchange	cit[c] -->	0	1	0	1	0.105019	1	0.367858	1	0.425572	1
52	EX_crn(e)	L-Carnitine exchange	crn[c] -->	0	1	0	1	0	1	0	1	0	1
53	EX_gam(e)	D-Glucosamine exchange	gam[c] -->	0	1	0	1	0	1	0	1	0	1
54	EX_glyc(e)	Glycerol exchange	glyc[c] -->	0	1	0	1	0	1	0	1	0	1
55	EX_inost(e)	myo-Inositol exchange	inost[c] -->	0	1	0	1	0	1	0	1	0	1
56	EX_malt(e)	Maltose exchange	malt[c] -->	0	1	0	1	0	1	0	1	0	1
57	EX_man(e)	D-Mannose exchange	man[c] -->	0	1	0	1	0	1	0	1	0	1
58	EX_rib-D(e)	D-Ribose exchange	rib-D[c] -->	0	1	0	1	0	1	0	1	0	1
59	EX_sucr(e)	Sucrose exchange	sucr[c] -->	0	1	0	1	0	1	0	1	0	1
60	EX_tre(e)	Trehalose exchange	tre[c] -->	0	1	0	1	0	1	0	1	0	1
61	EX_ade(e)	Adenine exchange	ade[c] -->	0	1	0	1	0	1	0	1	0	1
62	EX_4abut(e)	4-Aminobutanoate exchange	4abut[c] -->	0	1	0	1	0.0299959	1	0.0921416	1	0.102502	1
63	EX_ac(e)	Acetate exchange	ac[c] -->	0.00596577	1	0.0135824	1	0.199686	0.958131	0.578596	0.594029	0.668068	0.247774
64	EX_akg(e)	2-Oxoglutarate exchange	akg[c] -->	0	1	0	1	0.0121843	1	0.158463	1	0.355017	1
65	EX_csn(e)	Cytosine exchange	csn[c] -->	0	1	0	1	0	1	0	1	0	1
66	EX_cytd(e)	Cytidine exchange	cytd[c] -->	0	1	0	1	0	1	0	1	0	1
67	EX_dcyt(e)	Deoxycytidine exchange	dcyt[c] -->	0	1	0	1	0	1	0	1	0	1
68	EX_etoh(e)	Ethanol exchange	etoh[c] -->	0	1	0	1	0	1	0	1	0	1
69	EX_gua(e)	Guanine exchange	gua[c] -->	0	1	0	1	0	1	0	1	0	1
70	EX_hxan(e)	Hypoxanthine exchange	hxan[c] -->	0	1	0	1	0	1	0	1	0	1
71	EX_pyr(e)	Pyruvate exchange	pyr[c] -->	0	1	0.00129377	1	0.797589	1	5.28486	0.999971	9.98529	1
72	EX_succ(e)	Succinate exchange	succ[c] -->	0	1	0.00492433	1	0.108409	1	0.322494	0.895233	0.42612	0.999288
73	EX_ura(e)	Uracil exchange	ura[c] -->	0	1	0	1	0	1	0	1	0	1
74	EX_uri(e)	Uridine exchange	uri[c] -->	0	1	0	1	0	1	0	1	0	1
75	EX_ribflv(e)	Riboflavin exchange	ribflv[c] -->	0	1	0	1	0	1	0	1	0	1
76	EX_adn(e)	Adenosine exchange	adn[c] -->	0	1	0	1	0	1	0	1	0	1
77	EX_ins(e)	Inosine exchange	ins[c] -->	0	1	0	1	0	1	0	1	0	1
78	EX_ala-D(e)	D-Alanine exchange	ala-D[c] -->	0	1	0	1	0.0923803	1	0.273585	1	0.423737	1
79	EX_dad-2(e)	Deoxyadenosine exchange	dad-2[c] -->	0	1	0	1	0	1	0	1	0	1
80	EX_duri(e)	Deoxyuridine exchange	duri[c] -->	0	1	0	1	0	1	0	1	0	1
81	EX_gsn(e)	Guanosine exchange	gsn[c] -->	0	1	0	1	0	1	0	1	0	1
82	EX_ser-D(e)	D-Serine exchange	ser-D[c] -->	0	1	0	1	0	1	0	1	0	1
83	EX_thm(e)	Thiamin exchange	thm[c] -->	0	1	0	1	0	1	0	1	0	1
84	SUCRe	sucrose hydrolyzing enxyme, extracellular	h2o + sucr[c] --> fru + glc-D	0	1	0	1	0	1	0	1	0	1
85	EX_acald(e)	Acetaldehyde exchange	acald[c] -->	0	1	0	1	0	1	0	1	0	1
86	EX_btn(e)	Biotin exchange	btn[c] -->	0	1	0	1	0	1	0	1	0	1
87	EX_dgsn(e)	Deoxyguanosine exchange	dgsn[c] -->	0	1	0	1	0	1	0	1	0	1
88	EX_din(e)	Deoxyinosine exchange	din[c] -->	0	1	0	1	0	1	0	1	0	1
89	EX_gthox(e)	Oxidized glutathione exchange	gthox[c] -->	0	1	0	1	0	1	0	1	0	1
90	EX_pnto-R(e)	(R)-Pantothenate exchange	pnto-R[c] -->	0	1	0	1	0	1	0	1	0	1
91	EX_thym(e)	Thymine exchange	thym[c] -->	0	1	0	1	0	1	0	1	0	1
92	EX_amp(e)	AMP exchange	amp[c] -->	0	1	0	1	0	1	0	1	0	1
93	EX_taur(e)	Taurine exchange	taur[c] -->	0	1	0	1	0	1	0	1	0	1
94	EX_fuc-L(e)	L-Fucose exchange	fuc-L[c] -->	0	1	0	1	0	1	0	1	0	1
95	EX_lcts(e)	Lactose exchange	lcts[c] -->	0	1	0	1	0	1	0	1	0	1
96	EX_nac(e)	Nicotinate exchange	nac[c] -->	0	1	0	1	0	1	0	1	0	1
97	EX_nad(e)	Nicotinamide adenine dinucleotide exchange	nad[c] -->	0	1	0	1	0	1	0	1	0	1
98	EX_ocdca(e)	octadecanoate (n-C18:0) exchange	ocdca[c] -->	0	1	0	1	0	1	0	1	0	1
99	EX_ttdca(e)	tetradecanoate (n-C14:0) exchange	ttdca[c] -->	0	1	0	1	0	1	0	1	0	1
100	EX_hdcea(e)	hexadecenoate (n-C16:1) exchange	hdcea[c] -->	0	1	0	1	0	1	0	1	0	1
101	EX_ocdcea(e)	octadecenoate (n-C18:1) exchange	ocdcea[c] -->	0	1	0	1	0	1	0	1	0	1
102	EX_lac-D(e)	D-lactate exchange	lac-D[c] -->	0.00168676	1	0.0365585	1	2.56686	0.95982	9.9489	0.834271	21.3955	0.96503
103	EX_thmmp(e)	Thiamin monophosphate exchange	thmmp[c] -->	0	1	0	1	0	1	0	1	0	1
104	EX_abt(e)	L-Arabinitol exchange	abt[c] -->	0	1	0	1	0	1	0	1	0	1
105	EX_xylt(e)	Xylitol exchange	xylt[c] -->	0	1	0	1	0	1	0	1	0	1
106	TREHe	alpha,alpha-trehalase	h2o + tre[c] --> (2) glc-D	0	1	0	1	0	1	0	1	0	1
107	EX_but(e)	Butyrate (n-C4:0) exchange	but[c] -->	0	1	0	1	0	1	0	1	0	1
108	EX_glyb(e)	Glycine betaine exchange	glyb[c] -->	0	1	0	1	0	1	0	1	0	1
109	EX_tsul(e)	Thiosulfate exchange	tsul[c] -->	0	1	0	1	0	1	0	1	0	1
110	EX_malttr(e)	Maltotriose exchange	malttr[c] -->	0	1	0	1	0	1	0	1	0	1
111	EX_gthrd(e)	Reduced glutathione exchange	gthrd[c] -->	0	1	0	1	0	1	0	1	0	1
112	EX_atp(e)	ATP exchange	atp[c] -->	0	1	0	1	0	1	0	1	0	1
113	EX_acac(e)	Acetoacetate exchange	acac[c] -->	1.20282	0.987322	0.823459	1	0.384187	0.906577	0.132534	1	0.0637887	0.999971
114	EX_oh1	OH1 Exchange	oh1[c] -->	0	1	0	1	0	1	0	1	0	1
115	EX_adp	adp exchange	adp[c] -->	0	1	0	1	0	1	0	1	0	1
116	EX_arachd(e)	nC20:4 exchange	arachd[c] -->	0	1	0	1	0	1	0	1	0	1
117	EX_crvnc(e)	nC22:6 exchange	crvnc[c] -->	0	1	0	1	0	1	0	1	0	1
118	EX_bhb(e)	(R)-3-Hydroxybutanoate transport via H+ symport	bhb[c] -->	5.89667	0.0166188	3.66134	0.138578	1.39529	0.354083	0.467976	0.997469	0.186808	0.999874
119	EX_no(e)	Nitric oxide exchange	no[c] -->	0	1	0	1	0	1	0	1	0	1
120	NTP3e	nucleoside-triphosphatase (GTP)	gtp + h2o[c] --> gdp + h + pi	0	1	0	1	0	1	0	1	0	1
121	EX_meoh(e)	methanol exchange	meoh[c] -->	8.36535	0.994916	15.759	0.799977	20.0628	0.999967	18.3337	0.718906	15.1816	0.979567
122	EX_pheme(e)	Protoheme exchange	pheme[c] -->	0	1	0	1	0	1	0	1	0	1
123	EX_ascb-L(e)	L-Ascorbate exchange	ascb-L[c] -->	0	1	0	1	0	1	0	1	0	1
124	EX_ala-B(e)	beta-Alanine exchange	ala-B[c] -->	0	1	0	1	0.0209596	1	0.0203697	1	0.000803467	1
125	EX_octa(e)	octanoate (n-C8:0) exchange	octa[c] -->	0	1	0	1	0	1	0	1	0	1
126	EX_gdp(e)	GDP exchange	gdp[c] -->	0	1	0	1	0	1	0	1	0	1
127	EX_gtp(e)	GTP exchange	gtp[c] -->	0	1	0	1	0	1	0	1	0	1
128	EX_ncam(e)	Nicotinamide exchange	ncam[c] -->	0	1	0	1	0	1	0	1	0	1
129	EX_ppa(e)	Propionate exchange	ppa[c] -->	0	1	0	1	0	1	0	1	0	1
130	FUCASEe	alpha-fucosidase, extracellular	h2o + s2l2fn2m2masn[c] --> fuc-L + s2l2n2m2masn	0	1	0	1	0	1	0	1	0	1
131	EX_bilirub(e)	Bilirubin exchange	bilirub[c] -->	0	1	0	1	0	1	0	1	0	1
132	EX_co(e)	Carbon monoxide exchange	co[c] -->	0	1	0	1	0	1	0	1	0	1
133	EX_fol(e)	Folate exchange	fol[c] -->	0	1	0	1	0	1	0	1	0	1
134	EX_lipoate(e)	Lipoate exchange	lipoate[c] -->	0	1	0	1	0	1	0	1	0	1
135	EX_cl(e)	Chloride exchange	cl[c] -->	0	1	0	1	0	1	0	1	0	1
136	EX_4hphac(e)	4-Hydroxyphenylacetate exchange	4hphac[c] -->	0	1	0	1	0	1	0	1	0	1
137	DADAe	Deoxyadenosine deaminase, extracellular	dad-2 + h + h2o[c] --> din + nh4	0	1	0	1	0	1	0	1	0	1
138	ADAe	Adenosine deaminase, extracellular	adn + h + h2o[c] --> ins + nh4	0	1	0	1	0	1	0	1	0	1
139	LACZe	b-galactosidase, extracellular	h2o + lcts[c] --> gal + glc-D	0	1	0	1	0	1	0	1	0	1
140	MALTe	alpha-glucosidase, extracellular	h2o + malt[c] --> (2) glc-D	0	1	0	1	0	1	0	1	0	1
141	MLTG1e	Maltodextrin glucosidase (maltotriose), extracellular	h2o + malttr[c] --> glc-D + malt	0	1	0	1	0	1	0	1	0	1
142	EX_s2l2fn2m2masn(e)	PA6 exchange	s2l2fn2m2masn[c] -->	0	1	0	1	0	1	0	1	0	1
143	EX_s2l2n2m2masn(e)	de-Fuc form of PA6 exchange	s2l2n2m2masn[c] -->	0	1	0	1	0	1	0	1	0	1
144	AMY1e	alpha-amylase, extracellular (strch1 -> strch2)	(8) h2o + strch1[c] --> (8) glc-D + strch2	0	1	0	1	0	1	0	1	0	1
145	AMY2e	alpha-amylase, extracellular (glygn2 -> glygn4)	glygn2 + (8) h2o[c] --> (8) glc-D + glygn4	0	1	0	1	0	1	0	1	0	1
146	O16G1e	oligo-1,6-glucosidase (glygn4 -> glygn5), extracellular	glygn4 + h2o[c] --> glc-D + glygn5	0	1	0	1	0	1	0	1	0	1
147	O16G2e	oligo-1,6-glucosidase (strch2 ->strch3), extracellular	h2o + strch2[c] --> glc-D + malt	0	1	0	1	0	1	0	1	0	1
148	GAMYe	glucoamylase, extracellular (glygn5 -> malt)	glygn5 + h2o[c] --> Tyr-ggn + malt	0	1	0	1	0	1	0	1	0	1
149	EX_nadp(e)	Nicotinamide adenine dinucleotide phosphate exchange	nadp[c] -->	0	1	0	1	0	1	0	1	0	1
150	EX_Tyr-ggn(e)	Tyr-194 of apo-glycogenin protein (primer for glycogen synthesis) exchange	Tyr-ggn[c] -->	0	1	0	1	0	1	0	1	0	1
151	EX_dad-5(e)	5'-Deoxyadenosine exchange	dad-5[c] -->	0	1	0	1	0	1	0	1	0	1
152	EX_glygn2(e)	glycogen, structure 2 (glycogenin-1,6-{7[1,4-Glc], 4[1,4-Glc]}) exchange	glygn2[c] -->	0	1	0	1	0	1	0	1	0	1
153	EX_glygn4(e)	glycogen, structure 4 (glycogenin-1,6-{2[1,4-Glc], [1,4-Glc]}) exchange	glygn4[c] -->	0	1	0	1	0	1	0	1	0	1
154	EX_glygn5(e)	glycogen, structure 5 (glycogenin-2[1,4-Glc]) exchange	glygn5[c] -->	0	1	0	1	0	1	0	1	0	1
155	EX_strch1(e)	starch, structure 1 (1,6-{7[1,4-Glc], 4[1,4-Glc]}) exchange	strch1[c] -->	0	1	0	1	0	1	0	1	0	1
156	EX_strch2(e)	starch, structure 2 (1,6-{2[1,4-Glc], [1,4-Glc]}) exchange	strch2[c] -->	0	1	0	1	0	1	0	1	0	1
157	NTD2e	5'-nucleotidase (UMP), extracellular	h2o + ump[c] --> pi + uri	0	1	0	1	0	1	0	1	0	1
158	NTD4e	5'-nucleotidase (CMP), extracellular	cmp + h2o[c] --> cytd + pi	0	1	0	1	0	1	0	1	0	1
159	NTD9e	5'-nucleotidase (GMP), extracellular	gmp + h2o[c] --> gsn + pi	0	1	0	1	0	1	0	1	0	1
160	NTD7e	5'-nucleotidase (AMP), extracellular	amp + h2o[c] --> adn + pi	0	1	0	1	0	1	0	1	0	1
161	ATPH1e	ATP diphosphohydrolase	atp + (2) h2o[c] --> amp + (2) h + (2) pi	0	1	0	1	0	1	0	1	0	1
162	ATPH2e	ATP diphosphohydrolase	adp + h2o[c] --> amp + h + pi	0	1	0	1	0	1	0	1	0	1
163	BTNDe	biotinidase (biotin), extracellular	biocyt + h2o[c] --> btn + lys-L	0	1	0	1	0	1	0	1	0	1
164	NADPNe	NADP nucleosidase,extracellular	h2o + nadp[c] --> adprbp + h + ncam	0	1	0	1	0	1	0	1	0	1
165	NADNe	NAD nucleosidase,extracellular	h2o + nad[c] --> adprib + h + ncam	0	1	0	1	0	1	0	1	0	1
166	AMPTASECGe	alanyl aminopeptidase (cys-gly) (e)	cgly + h2o[c] --> cys-L + gly	0	1	0	1	0	1	0	1	0	1
167	GTHPe	glutathione peroxidase (e)	(2) gthrd + h2o2[c] --> gthox + (2) h2o	0	1	0	1	0	1	0	1	0	1
168	EX_1mncam(e)	1-Methylnicotinamide exchange	1mncam[c] -->	0	1	0	1	0	1	0	1	0	1
169	EX_biocyt(e)	Biocytin exchange	biocyt[c] -->	0	1	0	1	0	1	0	1	0	1
170	EX_cgly(e)	Cys-Gly exchange	cgly[c] -->	0	1	0	1	0	1	0	1	0	1
171	EX_chtn(e)	chitin exchange	chtn[c] -->	0	1	0	1	0	1	0	1	0	1
172	EX_cmp(e)	CMP exchange	cmp[c] -->	0	1	0	1	0	1	0	1	0	1
173	EX_gluala(e)	5-L-Glutamyl-L-alanine exchange	gluala[c] -->	0	1	0	1	0	1	0	1	0	1
174	EX_gmp(e)	GMP exchange	gmp[c] -->	0	1	0	1	0	1	0	1	0	1
175	EX_h2o2(e)	Hydrogen peroxide exchange	h2o2[c] -->	4.40641	0.985261	7.33742	0.976459	9.82737	0.985734	9.45747	0.93808	8.37881	0.984131
176	EX_phyQ(e)	Phylloquinone exchange	phyQ[c] -->	0	1	0	1	0	1	0	1	0	1
177	EX_ump(e)	UMP exchange	ump[c] -->	0	1	0	1	0	1	0	1	0	1
178	EX_4pyrdx(e)	4-Pyridoxate exchange	4pyrdx[c] -->	0	1	0	1	0	1	0	1	0	1
179	EX_caro(e)	beta-Carotene exchange	caro[c] -->	0	1	0	1	0	1	0	1	0	1
180	EX_pydam(e)	Pyridoxamine exchange	pydam[c] -->	0	1	0	1	0	1	0	1	0	1
181	EX_pydx(e)	Pyridoxal exchange	pydx[c] -->	0	1	0	1	0	1	0	1	0	1
182	EX_pydxn(e)	Pyridoxine exchange	pydxn[c] -->	0	1	0	1	0	1	0	1	0	1
183	EX_retinol(e)	Retinol exchange	retinol[c] -->	0	1	0	1	0	1	0	1	0	1
184	EX_retpalm(e) [deleted 10/09/2005 06:38:54 PM]	Retinyl palminate exchange	retpalm [deleted 10/09/2005 06:18:49 PM][c] -->	0	1	0	1	0	1	0	1	0	1
185	NDP3ex	nucleoside-diphosphatase (GDP), extracellular	gdp + h2o[c] --> gmp + h + pi	0	1	0	1	0	1	0	1	0	1
186	NDP7ex	nucleoside-diphosphatase (UDP), extracellular	h2o + udp[c] --> h + pi + ump	0	1	0	1	0	1	0	1	0	1
187	NDP10ex	nucleoside-diphosphatase (IDP), extracellular	h2o + idp[c] --> h + imp + pi	0	1	0	1	0	1	0	1	0	1
188	NDP8ex	nucleoside-diphosphatase (UTP), extracellular	h2o + utp[c] --> h + pi + udp	0	1	0	1	0	1	0	1	0	1
189	EX_idp(e)	IDP exchange	idp[c] -->	0	1	0	1	0	1	0	1	0	1
190	EX_imp(e)	IMP exchange	imp[c] -->	0	1	0	1	0	1	0	1	0	1
191	EX_udp(e)	UDP exchange	udp[c] -->	0	1	0	1	0	1	0	1	0	1
192	EX_utp(e)	UTP exchange	utp[c] -->	0	1	0	1	0	1	0	1	0	1
193	EX_2425dhvitd2(e)	24R,25-Dihyoxyvitamin D2 exchange	2425dhvitd2[c] -->	0	1	0	1	0	1	0	1	0	1
194	EX_2425dhvitd3(e)	24R,25-Dihydroxyvitamin D3 exchange	2425dhvitd3[c] -->	0	1	0	1	0	1	0	1	0	1
195	EX_25hvitd2(e)	25-Hydroxyvitamin D2 exchange	25hvitd2[c] -->	0	1	0	1	0	1	0	1	0	1
196	EX_25hvitd3(e)	25-Hydroxyvitamin D3 exchange	25hvitd3[c] -->	0	1	0	1	0	1	0	1	0	1
197	EX_avite1(e)	alpha-Tocopherol exchange	avite1[c] -->	0	1	0	1	0	1	0	1	0	1
198	EX_avite2(e)	alpha-Tocotrienol exchange	avite2[c] -->	0	1	0	1	0	1	0	1	0	1
199	EX_bvite(e)	beta-tocopherol exchange	bvite[c] -->	0	1	0	1	0	1	0	1	0	1
200	EX_cca_d3(e)	Calcitroic acid (D3) exchange	cca_d3[c] -->	0	1	0	1	0	1	0	1	0	1
201	EX_vitd2(e)	Vitamin D2 exchange	vitd2[c] -->	0	1	0	1	0	1	0	1	0	1
202	EX_vitd3(e)	Vitamin D3 exchange	vitd3[c] -->	0	1	0	1	0	1	0	1	0	1
203	EX_yvite(e)	gamma-Tocopherol exchange	yvite[c] -->	0	1	0	1	0	1	0	1	0	1
204	EX_pro-D(e)	D-Proline exchange	pro-D[c] -->	0	1	0	1	0	1	0	1	0	1
205	ACHEe	Acetylcholinesterase	ach + h2o[c] --> ac + chol + h	0	1	0	1	0	1	0	1	0	1
206	EX_5htrp(e)	5-Hydroxy-L-tryptophan exchange	5htrp[c] -->	0	1	0	1	0	1	0	1	0	1
207	EX_Lcystin(e)	L-Cystine exchange	Lcystin[c] -->	0	1	0	1	0	1	0	1	0	1
208	EX_ach(e)	Acetylcholine exchange	ach[c] -->	0	1	0	1	0	1	0	1	0	1
209	EX_adrnl(e)	Adrenaline exchange	adrnl[c] -->	0	1	0	1	0	1	0	1	0	1
210	EX_asp-D(e)	D-Aspartate exchange	asp-D[c] -->	0	1	0	1	0	1	0	1	0	1
211	EX_creat(e)	Creatine exchange	creat[c] -->	0	1	0	1	0	1	0	1	0	1
212	EX_dhdascb(e)	Dehydroascorbate exchange	dhdascb[c] -->	0	1	0	1	0	1	0	1	0	1
213	EX_dopa(e)	Dopamine exchange	dopa[c] -->	0	1	0	1	0	1	0	1	0	1
214	EX_hista(e)	Histamine exchange	hista[c] -->	0	1	0	1	0	1	0	1	0	1
215	EX_hom-L(e)	L-Homoserine exchange	hom-L[c] -->	0	1	0	1	0	1	0	1	0	1
216	EX_nrpphr(e)	Norepinephrine exchange	nrpphr[c] -->	0	1	0	1	0	1	0	1	0	1
217	EX_3aib(e)	L-3-Amino-isobutanoate exchange	3aib[c] -->	0	1	0	1	0	1	0	1	0	1
218	PLA2_2e	phospholipase A2	h2o + pchol_hs[c] --> Rtotal2 + h + lpchol_hs	0	1	0	1	0	1	0	1	0	1
219	EX_dag_hs(e)	diacylglycerol (homo sapiens) exchange	dag_hs[c] -->	0	1	0	1	0	1	0	1	0	1
220	EX_i(e)	Iodide exchange	i[c] -->	0	1	0	1	0	1	0	1	0	1
221	EX_lpchol_hs(e)	lysophosphatidylcholine (homo sapiens) exchange	lpchol_hs[c] -->	0	1	0	1	0	1	0	1	0	1
222	EX_pchol_hs(e)	Phosphatidylcholine (homo sapiens) exchange	pchol_hs[c] -->	0	1	0	1	0	1	0	1	0	1
223	EX_Rtotal2(e)	R total 2 position exchange	Rtotal2[c] -->	0	1	0	1	0	1	0	1	0	1
224	EX_Rtotal3(e)	R total 3 position exchange	Rtotal3[c] -->	0	1	0	1	0	1	0	1	0	1
225	EX_tag_hs(e)	triacylglycerol (homo sapiens) exchange	tag_hs[c] -->	0	1	0	1	0	1	0	1	0	1
226	EX_o2s(e)	Superoxide anion exchange	o2s[c] -->	0.00502071	1	0.0033623	1	0.00244433	0.999997	0.00294813	0.994313	0.00184136	0.999916
227	EX_2hb(e)	2-Hydroxybutyrate exchange	2hb[c] -->	0.0116484	0.107625	0.0147831	0.570507	0.0164476	0.338701	0.171643	1	0.0162751	0.993058
228	EX_acetone(e)	Acetone exchange	acetone[c] -->	0.0942367	1	0.0658591	1	0.0112766	1	0.00260457	1	0.00171135	1
229	EX_adrn(e)	adrenic acid exchange	adrn[c] -->	0	1	0	1	0	1	0	1	0	1
230	EX_arach(e)	Arachidic acid exchange	arach[c] -->	0	1	0	1	0	1	0	1	0	1
231	EX_bildglcur(e)	Bilirubin beta-diglucuronide exchange	bildglcur[c] -->	0	1	0	1	0	1	0	1	0	1
232	EX_bilglcur(e)	Bilirubin monoglucuronide exchange	bilglcur[c] -->	0	1	0	1	0	1	0	1	0	1
233	EX_cholate(e)	Cholate exchange	cholate[c] -->	0	1	0	1	0	1	0	1	0	1
234	EX_dcsptn1(e)	docosa-4,7,10,13,16-pentaenoic acid (n-6) exchange	dcsptn1[c] -->	0	1	0	1	0	1	0	1	0	1
235	EX_CLPND(e)	clupanodonic acid (docosapentaenoic (n-3)) exchange	clpnd[c] -->	0	1	0	1	0	1	0	1	0	1
236	EX_debrisoquine(e)	debrisoquine exchange	debrisoquine[c] -->	0	1	0	1	0	1	0	1	0	1
237	EX_dheas(e)	Dehydroepiandrosterone sulfate exchange	dheas[c] -->	0	1	0	1	0	1	0	1	0	1
238	EX_dlnlcg(e)	dihomo-gamma-linolenic acid (n-6) exchange	dlnlcg[c] -->	0	1	0	1	0	1	0	1	0	1
239	EX_eicostet(e)	eicosatetranoic acid exchange	eicostet[c] -->	0	1	0	1	0	1	0	1	0	1
240	EX_elaid(e)	elaidic acid exchange	elaid[c] -->	0	1	0	1	0	1	0	1	0	1
241	EX_estradiolglc(e)	estradiol glucuronide exchange	estradiolglc[c] -->	0	1	0	1	0	1	0	1	0	1
242	EX_estrones(e)	Estrone 3-sulfate exchange	estrones[c] -->	0	1	0	1	0	1	0	1	0	1
243	EX_gchola(e)	glycocholate exchange	gchola[c] -->	0	1	0	1	0	1	0	1	0	1
244	EX_hexc(e)	hexacosanoate (n-C26:0) exchange	hexc[c] -->	0	1	0	1	0	1	0	1	0	1
245	EX_leuktrC4(e)	Leukotriene C4 exchange	leuktrC4[c] -->	0	1	0	1	0	1	0	1	0	1
246	EX_lgnc(e)	lignoceric acid exchange	lgnc[c] -->	0	1	0	1	0	1	0	1	0	1
247	EX_lneldc(e)	linoelaidic acid exchange	lneldc[c] -->	0	1	0	1	0	1	0	1	0	1
248	EX_lnlc(e) [deleted 08/16/2005 05:23:37 PM]	linoleic acid exchange	lnlc[c] -->	0	1	0	1	0	1	0	1	0	1
249	EX_lnlnca(e)	alpha-Linolenic acid exchange	lnlnca[c] -->	0	1	0	1	0	1	0	1	0	1
250	EX_lnlncg(e)	gamma-linolenic acid exchange	lnlncg[c] -->	0	1	0	1	0	1	0	1	0	1
251	EX_nrvnc(e)	nervonic acid exchange	nrvnc[c] -->	0	1	0	1	0	1	0	1	0	1
252	EX_oxa(e)	Oxalate exchange	oxa[c] -->	0	1	0	1	0	1	0	1	0	1
253	EX_prostgd2(e)	Prostaglandin D2 exchange	prostgd2[c] -->	0	1	0	1	0	1	0	1	0	1
254	EX_prostge1(e)	Prostaglandin E1 exchange	prostge1[c] -->	0	1	0	1	0	1	0	1	0	1
255	EX_prostge2(e)	Prostaglandin E2 exchange	prostge2[c] -->	0	1	0	1	0	1	0	1	0	1
256	EX_prostgf2(e)	Prostaglandin F2alpha exchange	prostgf2[c] -->	0	1	0	1	0	1	0	1	0	1
257	EX_sel(e)	Selenate exchange	sel[c] -->	0	1	0	1	0	1	0	1	0	1
258	EX_srtn(e)	Serotonin exchange	srtn[c] -->	0	1	0	1	0	1	0	1	0	1
259	EX_strdnc(e)	stearidonic acid exchange	strdnc[c] -->	0	1	0	1	0	1	0	1	0	1
260	EX_tchola(e)	Taurocholic acid exchange	tchola[c] -->	0	1	0	1	0	1	0	1	0	1
261	EX_tethex3(e)	tetracosahexaenoic acid, n-3 exchange	tethex3[c] -->	0	1	0	1	0	1	0	1	0	1
262	EX_tetpent3(e)	tetracosapentaenoic acid, n-3 exchange	tetpent3[c] -->	0	1	0	1	0	1	0	1	0	1
263	EX_tetpent6(e)	tetracosapentaenoic acid, n-6 exchange	tetpent6[c] -->	0	1	0	1	0	1	0	1	0	1
264	EX_tettet6(e)	tetracosatetraenoic acid n-6 exchange	tettet6[c] -->	0	1	0	1	0	1	0	1	0	1
265	EX_thyox-L(e)	L-Thyroxine exchange	thyox-L[c] -->	0	1	0	1	0	1	0	1	0	1
266	EX_tmndnc(e)	timnodonic acid exchange	tmndnc[c] -->	0	1	0	1	0	1	0	1	0	1
267	EX_triodthy(e)	Triiodothyronine exchange	triodthy[c] -->	0	1	0	1	0	1	0	1	0	1
268	EX_vacc(e)	vaccenic acid exchange	vacc[c] -->	0	1	0	1	0	1	0	1	0	1
269	EX_34dhphe(e)	3,4-Dihydroxy-L-phenylalanine exchange	34dhphe[c] -->	0	1	0	1	0	1	0	1	0	1
270	EX_35cgmp(e)	3',5'-Cyclic GMP exchange	35cgmp[c] -->	0	1	0	1	0	1	0	1	0	1
271	EX_camp(e)	cAMP exchange	camp[c] -->	0	1	0	1	0	1	0	1	0	1
272	EX_10fthf(e)	10-Formyltetrahydrofolate exchange	10fthf[c] -->	0	1	0	1	0	1	0	1	0	1
273	EX_thf(e)	5,6,7,8-Tetrahydrofolate exchange	thf[c] -->	7.47851	0.951814	12.1453	0.997295	15.1989	0.999995	14.9834	1	14.7147	0.999992
274	FE3R2e	Fe(III) reduction (ascorbate)	ascb-L + (2) fe3[c] --> dhdascb + (2) fe2 + (2) h	0	1	0	1	0	1	0	1	0	1
275	SPODMe	superoxide dismutase, extracellular	(2) h + (2) o2s[c] --> h2o2 + o2	0	1	0	1	0	1	0	1	0	1
276	CHTNASEe	chitinase, extracellular	chtn + (2) h2o[c] --> (3) acgam	0	1	0	1	0	1	0	1	0	1
277	EX_cyan(e)	Hydrogen cyanide exchange	cyan[c] -->	0	1	0	1	0	1	0	1	0	1
278	EX_tcynt(e)	Thiocyanate exchange	tcynt[c] -->	0	1	0	1	0	1	0	1	0	1
279	EX_1glyc_hs(e)	1 acyl phosphoglycerol exchange	1glyc_hs[c] -->	0	1	0	1	0	1	0	1	0	1
280	EX_Rtotal(e)	R total exchange	Rtotal[c] -->	0	1	0	1	0	1	0	1	0	1
281	EX_estroneglc(e)	estrone glucuronide exchange	estroneglc[c] -->	0	1	0	1	0	1	0	1	0	1
282	EX_lnlc(e)	linoleic acid (all cis C18:2) exchange	lnlc[c] -->	0	1	0	1	0	1	0	1	0	1
283	EX_mag_hs(e)	monoacylglycerol 2 (homo sapiens) exchange	mag_hs[c] -->	0	1	0	1	0	1	0	1	0	1
284	EX_pglyc_hs(e)	phosphatidylglycerol (homo sapiens) exchange	pglyc_hs[c] -->	0	1	0	1	0	1	0	1	0	1
285	EX_thmtp(e)	Thiamin triphosphate exchange	thmtp[c] -->	0	1	0	1	0	1	0	1	0	1
286	LPS2e	lipase, extracellular	dag_hs + h2o[c] --> Rtotal + h + mag_hs	0	1	0	1	0	1	0	1	0	1
287	LPS3e	lipase, extracellular	h2o + mag_hs[c] --> Rtotal2 + glyc + h	0	1	0	1	0	1	0	1	0	1
288	LPS4e	phospholipase	h2o + pglyc_hs[c] --> 1glyc_hs + Rtotal2 + h	0	1	0	1	0	1	0	1	0	1
289	LPSe	lipase	h2o + tag_hs[c] --> Rtotal3 + dag_hs + h	0	1	0	1	0	1	0	1	0	1
290	FUCASE2e	alpha-fucosidase, extracellular	h2o + ksi[c] --> fuc-L + ksi_deg1	0	1	0	1	0	1	0	1	0	1
291	EX_34dhoxpeg(e)	3,4-Dihydroxyphenylethyleneglycol exchange	34dhoxpeg[c] -->	0	1	0	1	0	1	0	1	0	1
292	EX_3mlda(e)	3-Methylimidazoleacetic acid exchange	3mlda[c] -->	0	1	0	1	0	1	0	1	0	1
293	EX_ha(e)	hyaluronan exchange	ha[c] -->	0	1	0	1	0	1	0	1	0	1
294	EX_ha_pre1(e)	hyaluronan biosynthesis, precursor 1 exchange	ha_pre1[c] -->	0	1	0	1	0	1	0	1	0	1
295	EX_ksi(e)	keratan sulfate I exchange	ksi[c] -->	0	1	0	1	0	1	0	1	0	1
296	EX_ksi_deg1(e)	keratan sulfate I, degradation product 1 exchange	ksi_deg1[c] -->	0	1	0	1	0	1	0	1	0	1
297	EX_pheacgln(e)	alpha-N-Phenylacetyl-L-glutamine exchange	pheacgln[c] -->	0	1	0	1	0	1	0	1	0	1
298	EX_sl-L(e)	L-sulfolactate exchange	sl-L[c] -->	0	1	0	1	0	1	0	1	0	1
299	EX_aqcobal(e)	Aquacob(III)alamin exchange	aqcobal[c] -->	0	1	0	1	0	1	0	1	0	1
300	EX_sarcs(e)	Sarcosine exchange	sarcs[c] -->	0	1	0	1	3.54742e-05	1	4.24887e-05	1	0	1
301	LCAT1e	Lecithin-cholesterol acyltransferase	chsterol + pchol_hs[c] --> lpchol_hs + xolest2_hs	0	1	0	1	0	1	0	1	0	1
302	EX_mthgxl(e)	Methylglyoxal exchange	mthgxl[c] -->	0.010144	1	0.00622961	1	0.000457563	1	0	1	0.000786875	1
303	EX_peplys(e)	Peptidyl-L-lysine exchange	peplys[c] -->	0	1	0	1	0	1	0	1	0	1
304	EX_xolest2_hs(e)	cholesterol ester (from FULLR2) exchange	xolest2_hs[c] -->	0	1	0	1	0	1	0	1	0	1
305	EX_xolest_hs(e)	cholesterol ester exchange	xolest_hs[c] -->	0	1	0	1	0	1	0	1	0	1
306	EX_5fthf(e)	5-Formyltetrahydrofolate exchange	5fthf[c] -->	0	1	0	1	0	1	0	1	0	1
307	EX_5mthf(e)	5-Methyltetrahydrofolate exchange	5mthf[c] -->	0	1	0	1	0	1	0	1	0	1
308	GGH-7THFe	Gamma-glutamyl hydrolase (7THF), extracellular	7thf + h2o[c] --> 6thf + glu-L	0	1	0	1	0	1	0	1	0	1
309	GGH-6THFe	Gamma-glutamyl hydrolase (6THF), extracellular	6thf + h2o[c] --> 5thf + glu-L	0	1	0	1	0	1	0	1	0	1
310	GGH-5THFe	Gamma-glutamyl hydrolase (5THF), extracellular	5thf + (4) h2o[c] --> (4) glu-L + thf	0	1	0	1	0	1	0	1	0	1
311	GGH-5DHFe	Gamma-glutamyl hydrolase (5DHF), extracellular	5dhf + (4) h2o[c] --> dhf + (4) glu-L	0	1	0	1	0	1	0	1	0	1
312	GGH-6DHFe	Gamma-glutamyl hydrolase (6DHF), extracellular	6dhf + h2o[c] --> 5dhf + glu-L	0	1	0	1	0	1	0	1	0	1
313	GGH-7DHFe	Gamma-glutamyl hydrolase (7DHF), extracellular	7dhf + h2o[c] --> 6dhf + glu-L	0	1	0	1	0	1	0	1	0	1
314	GGH-10FTHF5GLUe	Gamma-glutamyl hydrolase (10FTHF5GLU), extracellular	10fthf5glu + (4) h2o[c] --> 10fthf + (4) glu-L	0	1	0	1	0	1	0	1	0	1
315	GGH-10FTHF6GLUe	Gamma-glutamyl hydrolase (10FTHF6GLU), extracellular	10fthf6glu + h2o[c] --> 10fthf5glu + glu-L	0	1	0	1	0	1	0	1	0	1
316	GGH-10FTHF7GLUe	Gamma-glutamyl hydrolase (10FTHF7GLU), extracellular	10fthf7glu + h2o[c] --> 10fthf6glu + glu-L	0	1	0	1	0	1	0	1	0	1
317	EX_10fthf5glu(e)	10-formyltetrahydrofolate-[Glu](5) exchange	10fthf5glu[c] -->	0	1	0	1	0	1	0	1	0	1
318	EX_10fthf6glu(e)	10-formyltetrahydrofolate-[Glu](6) exchange	10fthf6glu[c] -->	0	1	0	1	0	1	0	1	0	1
319	EX_10fthf7glu(e)	10-formyltetrahydrofolate-[Glu](7) exchange	10fthf7glu[c] -->	0	1	0	1	0	1	0	1	0	1
320	EX_5dhf(e)	pentaglutamyl folate (DHF) exchange	5dhf[c] -->	0	1	0	1	0	1	0	1	0	1
321	EX_5thf(e)	pentaglutamyl folate (THF) exchange	5thf[c] -->	0	1	0	1	0	1	0	1	0	1
322	EX_6dhf(e)	haxglutamyl folate (DHF) exchange	6dhf[c] -->	0	1	0	1	0	1	0	1	0	1
323	EX_6thf(e)	hexaglutamyl folate (THF) exchange	6thf[c] -->	0	1	0	1	0	1	0	1	0	1
324	EX_7dhf(e)	heptaglutamyl folate (DHF) exchange	7dhf[c] -->	0	1	0	1	0	1	0	1	0	1
325	EX_7thf(e)	heptaglutamyl folate (THF) exchange	7thf[c] -->	0	1	0	1	0	1	0	1	0	1
326	EX_hspg(e)	heparan sulfate proteoglycan exchange	hspg[c] -->	0	1	0	1	0	1	0	1	0	1
327	EX_cspg_e(e)	chondroitin sulfate E (GalNAc4,6diS-GlcA) proteoglycan exchange	cspg_e[c] -->	0	1	0	1	0	1	0	1	0	1
328	EX_cspg_a(e)	chondroitin sulfate A (GalNAc4S-GlcA) proteoglycan exchange	cspg_a[c] -->	0	1	0	1	0	1	0	1	0	1
329	EX_cspg_b(e)	chondroitin sulfate B / dermatan sulfate (IdoA2S-GalNAc4S) proteoglycan exchange	cspg_b[c] -->	0	1	0	1	0	1	0	1	0	1
330	EX_cspg_c(e)	chondroitin sulfate C (GalNAc6S-GlcA) proteoglycan exchange	cspg_c[c] -->	0	1	0	1	0	1	0	1	0	1
331	EX_ksii_core2(e)	keratan sulfate II (core 2-linked) exchange	ksii_core2[c] -->	0	1	0	1	0	1	0	1	0	1
332	EX_ksii_core4(e)	keratan sulfate II (core 4-linked) exchange	ksii_core4[c] -->	0	1	0	1	0	1	0	1	0	1
333	EX_cspg_d(e)	chondroitin sulfate D (GlcNAc6S-GlcA2S) proteoglycan exchange	cspg_d[c] -->	0	1	0	1	0	1	0	1	0	1
334	PAFHe	Platelet-activating factor acetylhydrolase	h2o + paf_hs[c] --> ac + ak2lgchol_hs + h	0	1	0	1	0	1	0	1	0	1
335	EX_adprbp(e)	ADPribose 2'-phosphate exchange	adprbp[c] -->	0	1	0	1	0	1	0	1	0	1
336	EX_adprib(e)	ADPribose exchange	adprib[c] -->	0	1	0	1	0	1	0	1	0	1
337	EX_ak2lgchol_hs(e)	1-alkyl 2-lysoglycerol 3-phosphocholine exchange	ak2lgchol_hs[c] -->	0	1	0	1	0	1	0	1	0	1
338	EX_paf_hs(e)	1-alkyl 2-acteylglycerol 3-phosphocholine (homo sapiens) exchange	paf_hs[c] -->	0	1	0	1	0	1	0	1	0	1
339	EX_pe_hs(e)	phosphatidylethanolamine (homo sapiens) exchange	pe_hs[c] -->	0	1	0	1	0	1	0	1	0	1
340	EX_ps_hs(e)	phosphatidylserine (homo sapiens) exchange	ps_hs[c] -->	0	1	0	1	0	1	0	1	0	1
341	RETHe	retinyl ester hydrolase, extracellular	h2o + retfa[c] --> Rtotal2 + h + retinol	0	1	0	1	0	1	0	1	0	1
342	EX_retfa(e)	fatty acid retinol exchange	retfa[c] -->	0	1	0	1	0	1	0	1	0	1
343	RETH1e	retinyl ester hydrolase (9-cis), extracellular	9-cis-retfa + h2o[c] --> Rtotal2 + h + retinol-9-cis	0	1	0	1	0	1	0	1	0	1
344	RETH2e	retinyl ester hydrolase (11-cis), extracellular	11-cis-retfa + h2o[c] --> Rtotal2 + h + retinol-cis-11	0	1	0	1	0	1	0	1	0	1
345	EX_11-cis-retfa(e)	fatty acid 11-cis-retinol exchange	11-cis-retfa[c] -->	0	1	0	1	0	1	0	1	0	1
346	EX_9-cis-retfa(e)	fatty acid 9-cis-retinol exchange	9-cis-retfa[c] -->	0	1	0	1	0	1	0	1	0	1
347	EX_retinol-9-cis(e)	9-cis-retinol exchange	retinol-9-cis[c] -->	0	1	0	1	0	1	0	1	0	1
348	EX_retinol-cis-11(e)	cis-11-retinol exchange	retinol-cis-11[c] -->	0	1	0	1	0	1	0	1	0	1
349	EX_retn(e)	Retinoate exchange	retn[c] -->	0	1	0	1	0	1	0	1	0	1
350	EX_retnglc(e)	retinoyl glucuronide exchange	retnglc[c] -->	0	1	0	1	0	1	0	1	0	1
351	EX_retpalm [deleted 10/09/2005 06:18:49 PM](e)	Retinyl palminate exchange	retpalm [deleted 10/09/2005 06:18:49 PM][c] -->	0	1	0	1	0	1	0	1	0	1
352	EX_dopasf(e)	Dopamine 3-O-sulfate exchange	dopasf[c] -->	0	1	0	1	0	1	0	1	0	1
353	EX_nrpphrsf(e)	Sulfate derivative of norepinephrine exchange	nrpphrsf[c] -->	0	1	0	1	0	1	0	1	0	1
354	EX_triodthysuf(e)	Triiodothyronine sulfate exchange	triodthysuf[c] -->	0	1	0	1	0	1	0	1	0	1
355	EX_tymsf(e)	Tyramine O-sulfate exchange	tymsf[c] -->	0	1	0	1	0	1	0	1	0	1
356	EX_urate(e)	Urate exchange	urate[c] -->	0	1	0	1	0	1	0	1	0	1
357	EX_carveol(e)	(E)-carveol exchange	carveol[c] -->	0	1	0	1	0	1	0	1	0	1
358	EX_gp1c_hs(e)	GP1c (homo sapiens) exchange	gp1c_hs[c] -->	0	1	0	1	0	1	0	1	0	1
359	EX_gp1calpha_hs(e)	GP1c alpha (homo sapiens) exchange	gp1calpha_hs[c] -->	0	1	0	1	0	1	0	1	0	1
360	EX_gq1b_hs(e)	GQ1b (homo sapiens) exchange	gq1b_hs[c] -->	0	1	0	1	0	1	0	1	0	1
361	EX_gq1balpha_hs(e)	GQ1balpha (homo sapiens) exchange	gq1balpha_hs[c] -->	0	1	0	1	0	1	0	1	0	1
362	EX_aldstrn(e)	Aldosterone exchange	aldstrn[c] -->	0	1	0	1	0	1	0	1	0	1
363	EX_perillyl(e)	Perillyl alcohol exchange	perillyl[c] -->	0	1	0	1	0	1	0	1	0	1
364	EX_gt1a_hs(e)	GT1a (homo sapiens) exchange	gt1a_hs[c] -->	0	1	0	1	0	1	0	1	0	1
365	EX_acgalfucgalacgalfucgalacglcgal14acglcgalgluside_hs(e)	Type IIIAb exchange	acgalfucgalacgalfucgalacglcgal14acglcgalgluside_hs[c] -->	0	1	0	1	0	1	0	1	0	1
366	EX_andrstrn(e)	Androsterone exchange	andrstrn[c] -->	0	1	0	1	0	1	0	1	0	1
367	EX_digalsgalside_hs(e)	Digalactosylceramidesulfate exchange	digalsgalside_hs[c] -->	0	1	0	1	0	1	0	1	0	1
368	EX_andrstrnglc(e)	androsterone glucuronide exchange	andrstrnglc[c] -->	0	1	0	1	0	1	0	1	0	1
369	EX_phyt(e)	phytanic acid exchange	phyt[c] -->	0	1	0	1	0	1	0	1	0	1
370	EX_antipyrene(e)	antipyrene exchange	antipyrene[c] -->	0	1	0	1	0	1	0	1	0	1
371	EX_dmantipyrine(e)	demethylated antipyrine exchange	dmantipyrine[c] -->	0	1	0	1	0	1	0	1	0	1
372	EX_dmhptcrn(e)	2,6 dimethylheptanoyl carnitine exchange	dmhptcrn[c] -->	0	1	0	1	0	1	0	1	0	1
373	EX_apnnox(e)	alpha-Pinene-oxide exchange	apnnox[c] -->	0	1	0	1	0	1	0	1	0	1
374	EX_appnn(e)	(+)-alpha-Pinene exchange	appnn[c] -->	0	1	0	1	0	1	0	1	0	1
375	EX_drib(e)	Deoxyribose exchange	drib[c] -->	0	1	0	1	0	1	0	1	0	1
376	EX_hcoumarin(e)	hydroxy coumarin exchange	hcoumarin[c] -->	0	1	0	1	0	1	0	1	0	1
377	EX_aprgstrn(e)	20alpha-Hydroxyprogesterone exchange	aprgstrn[c] -->	0	1	0	1	0	1	0	1	0	1
378	EX_eaflatoxin(e)	8,9 epxoy aflatoxin B1 exchange	eaflatoxin[c] -->	0	1	0	1	0	1	0	1	0	1
379	EX_ptdca(e)	pentadecanoate exchange	ptdca[c] -->	0	1	0	1	0	1	0	1	0	1
380	EX_hestratriol(e)	4,17 dihydroxy estradiol exchange	hestratriol[c] -->	0	1	0	1	0	1	0	1	0	1
381	EX_ebastine(e)	ebastine exchange	ebastine[c] -->	0	1	0	1	0	1	0	1	0	1
382	EX_ebastineoh(e)	hydroxylated ebastine exchange	ebastineoh[c] -->	0	1	0	1	0	1	0	1	0	1
383	EX_5adtststerone(e)	5alpha-Dihydrotestosterone exchange	5adtststerone[c] -->	0	1	0	1	0	1	0	1	0	1
384	EX_rbt(e)	Ribitol exchange	rbt[c] -->	0	1	0	1	0	1	0	1	0	1
385	EX_hpdca(e)	heptadecanoate exchange	hpdca[c] -->	0	1	0	1	0	1	0	1	0	1
386	EX_5adtststeroneglc(e)	5alpha-Dihydrotestosterone glucuronide exchange	5adtststeroneglc[c] -->	0	1	0	1	0	1	0	1	0	1
387	EX_htaxol(e)	hydroxylated taxol exchange	htaxol[c] -->	0	1	0	1	0	1	0	1	0	1
388	EX_estriolglc(e)	16-Glucuronide-estriol exchange	estriolglc[c] -->	0	1	0	1	0	1	0	1	0	1
389	EX_acn13acngalgbside_hs(e)	sialyl (1,3) sialyl (2,6) galactosylgloboside (homo sapiens) exchange	acn13acngalgbside_hs[c] -->	0	1	0	1	0	1	0	1	0	1
390	EX_acn23acngalgbside_hs(e)	sialyl (2,3) sialyl (2,6) galactosylgloboside (homo sapiens) exchange	acn23acngalgbside_hs[c] -->	0	1	0	1	0	1	0	1	0	1
391	EX_coumarin(e)	coumarin exchange	coumarin[c] -->	0	1	0	1	0	1	0	1	0	1
392	EX_acnacngal14acglcgalgluside_hs(e)	3',8'-LD1 exchange	acnacngal14acglcgalgluside_hs[c] -->	0	1	0	1	0	1	0	1	0	1
393	EX_crmp_hs(e)	Ceramide 1-phosphate exchange	crmp_hs[c] -->	0	1	0	1	0	1	0	1	0	1
394	EX_acnacngalgbside_hs(e)	disialyl galactosylgloboside (homo sapiens) exchange	acnacngalgbside_hs[c] -->	0	1	0	1	0	1	0	1	0	1
395	EX_acngalacglcgal14acglcgalgluside_hs(e)	VI3NeuAc-nLc6Cer exchange	acngalacglcgal14acglcgalgluside_hs[c] -->	0	1	0	1	0	1	0	1	0	1
396	EX_5adtststerones(e)	5alpha-Dihydrotestosterone sulfate exchange	5adtststerones[c] -->	0	1	0	1	0	1	0	1	0	1
397	EX_13-cis-retnglc(e)	13-cis-retinoyl glucuronide exchange	13-cis-retnglc[c] -->	0	1	0	1	0	1	0	1	0	1
398	EX_fuc13galacglcgal14acglcgalgluside_hs(e)	III3Fuc-nLc6Cer exchange	fuc13galacglcgal14acglcgalgluside_hs[c] -->	0	1	0	1	0	1	0	1	0	1
399	EX_fuc14galacglcgalgluside_hs(e)	Lea glycolipid exchange	fuc14galacglcgalgluside_hs[c] -->	0	1	0	1	0	1	0	1	0	1
400	EX_sph1p(e)	Sphinganine 1-phosphate exchange	sph1p[c] -->	0	1	0	1	0	1	0	1	0	1
401	EX_sphs1p(e)	Sphingosine 1-phosphate exchange	sphs1p[c] -->	0	1	0	1	0	1	0	1	0	1
402	EX_fucacgalfucgalacglcgalgluside_hs(e)	(Gal)2 (GalNAc)1 (Glc)1 (GlcNAc)1 (LFuc)2 (Cer)1 exchange	fucacgalfucgalacglcgalgluside_hs[c] -->	0	1	0	1	0	1	0	1	0	1
403	EX_fucacngal14acglcgalgluside_hs(e)	IV3-a-NeuAc,III3-a-Fuc-nLc4Cer exchange	fucacngal14acglcgalgluside_hs[c] -->	0	1	0	1	0	1	0	1	0	1
404	EX_fucacngalacglcgalgluside_hs(e)	IV3-a-Neu5Ac,III4-a-Fuc-Lc4Cer exchange	fucacngalacglcgalgluside_hs[c] -->	0	1	0	1	0	1	0	1	0	1
405	EX_fucfuc12gal14acglcgalgluside_hs(e)	Ley glycolipid exchange	fucfuc12gal14acglcgalgluside_hs[c] -->	0	1	0	1	0	1	0	1	0	1
406	EX_fucfuc132galacglcgal14acglcgalgluside_hs(e)	V3Fuc,III3Fuc-nLc6Cer exchange	fucfuc132galacglcgal14acglcgalgluside_hs[c] -->	0	1	0	1	0	1	0	1	0	1
407	EX_fucfucfucgalacglc13galacglcgal14acglcgalgluside_hs(e)	(Gal)4 (Glc)1 (GlcNAc)3 (LFuc)3 (Cer)1 exchange	fucfucfucgalacglc13galacglcgal14acglcgalgluside_hs[c] -->	0	1	0	1	0	1	0	1	0	1
408	EX_limnen(e)	Limonene exchange	limnen[c] -->	0	1	0	1	0	1	0	1	0	1
409	EX_tagat-D(e)	D-Tagatose exchange	tagat-D[c] -->	0	1	0	1	0	1	0	1	0	1
410	EX_fucfucfucgalacglcgal14acglcgalgluside_hs(e)	(Gal)3 (Glc)1 (GlcNAc)2 (LFuc)3 (Cer)1 exchange	fucfucfucgalacglcgal14acglcgalgluside_hs[c] -->	0	1	0	1	0	1	0	1	0	1
411	EX_taxol(e)	paclitaxel exchange	taxol[c] -->	0	1	0	1	0	1	0	1	0	1
412	EX_fucfucgalacglcgalgluside_hs(e)	Leb glycolipid exchange	fucfucgalacglcgalgluside_hs[c] -->	0	1	0	1	0	1	0	1	0	1
413	EX_tdchola(e)	taurochenodeoxycholate exchange	tdchola[c] -->	0	1	0	1	0	1	0	1	0	1
414	EX_fucgal14acglcgalgluside_hs(e)	Lacto-N-fucopentaosyl III ceramide exchange	fucgal14acglcgalgluside_hs[c] -->	0	1	0	1	0	1	0	1	0	1
415	EX_fucgalfucgalacglcgalgluside_hs(e)	(Gal)3 (Glc)1 (GlcNAc)1 (LFuc)2 (Cer)1 exchange	fucgalfucgalacglcgalgluside_hs[c] -->	0	1	0	1	0	1	0	1	0	1
416	EX_fucgalgbside_hs(e)	fucosyl galactosylgloboside (homo sapiens) exchange	fucgalgbside_hs[c] -->	0	1	0	1	0	1	0	1	0	1
417	EX_4hdebrisoquine(e)	4 hydroxy debrisoquine exchange	4hdebrisoquine[c] -->	0	1	0	1	0	1	0	1	0	1
418	EX_galacglcgalgbside_hs(e)	Gal-GlcNAc-Gal globoside (homo sapiens) exchange	galacglcgalgbside_hs[c] -->	0	1	0	1	0	1	0	1	0	1
419	EX_galfuc12gal14acglcgalgluside_hs(e)	(Gal)3 (Glc)1 (GlcNAc)1 (LFuc)1 (Cer)1 exchange	galfuc12gal14acglcgalgluside_hs[c] -->	0	1	0	1	0	1	0	1	0	1
420	EX_galfucgalacglcgal14acglcgalgluside_hs(e)	(Gal)4 (Glc)1 (GlcNAc)2 (LFuc)1 (Cer)1 exchange	galfucgalacglcgal14acglcgalgluside_hs[c] -->	0	1	0	1	0	1	0	1	0	1
421	EX_galgalfucfucgalacglcgalacglcgal14acglcgalgluside_hs(e)	(Gal)6 (Glc)1 (GlcNAc)3 (LFuc)2 (Cer)1 exchange	galgalfucfucgalacglcgalacglcgal14acglcgalgluside_hs[c] -->	0	1	0	1	0	1	0	1	0	1
422	EX_galgalgalthcrm_hs(e)	Gal-Gal-Gal-Gal-Gal-Glc-Cer (homo sapiens) exchange	galgalgalthcrm_hs[c] -->	0	1	0	1	0	1	0	1	0	1
423	EX_5homeprazole(e)	5 hydroxy omeprazole exchange	5homeprazole[c] -->	0	1	0	1	0	1	0	1	0	1
424	EX_mepi(e)	Metanephrine exchange	mepi[c] -->	0	1	0	1	0	1	0	1	0	1
425	EX_mercplaccys(e)	3-mercaptolactate-cysteine disulfide exchange	mercplaccys[c] -->	0	1	0	1	0	1	0	1	0	1
426	EX_gbside_hs(e)	globoside (homo sapiens) exchange	gbside_hs[c] -->	0	1	0	1	0	1	0	1	0	1
427	EX_tolbutamide(e)	tolbutamide exchange	tolbutamide[c] -->	0	1	0	1	0	1	0	1	0	1
428	EX_3aib-D(e)	D-3-Amino-isobutanoate exchange	3aib-D[c] -->	0	1	0	1	0	1	0	1	0	1
429	EX_gd1b2_hs(e)	GD1beta (homo sapiens) exchange	gd1b2_hs[c] -->	0	1	0	1	0	1	0	1	0	1
430	EX_gd1c_hs(e)	GD1c (homo sapiens) exchange	gd1c_hs[c] -->	0	1	0	1	0	1	0	1	0	1
431	EX_gdchola(e)	glycochenodeoxycholate exchange	gdchola[c] -->	0	1	0	1	0	1	0	1	0	1
432	EX_tststeroneglc(e)	testosterone glucuronide exchange	tststeroneglc[c] -->	0	1	0	1	0	1	0	1	0	1
433	EX_tststerones(e)	testosterone sulfate exchange	tststerones[c] -->	0	1	0	1	0	1	0	1	0	1
434	EX_4mtolbutamide(e)	4 hydroxy tolbutamide exchange	4mtolbutamide[c] -->	0	1	0	1	0	1	0	1	0	1
435	EX_txa2(e)	Thromboxane A2 exchange	txa2[c] -->	0	1	0	1	0	1	0	1	0	1
436	EX_aflatoxin(e)	aflatoxin B1 exchange	aflatoxin[c] -->	0	1	0	1	0	1	0	1	0	1
437	EX_nifedipine(e)	nifedipine exchange	nifedipine[c] -->	0	1	0	1	0	1	0	1	0	1
438	EX_npthl(e)	Naphthalene exchange	npthl[c] -->	0	1	0	1	0	1	0	1	0	1
439	EX_ahandrostanglc(e)	Etiocholan-3alpha-ol-17-one 3-glucuronide exchange	ahandrostanglc[c] -->	0	1	0	1	0	1	0	1	0	1
440	EX_4nph(e)	4-Nitrophenol exchange	4nph[c] -->	0	1	0	1	0	1	0	1	0	1
441	EX_4nphsf(e)	4-Nitrophenyl sulfate exchange	4nphsf[c] -->	0	1	0	1	0	1	0	1	0	1
442	EX_6htststerone(e)	6 beta hydroxy testosterone exchange	6htststerone[c] -->	0	1	0	1	0	1	0	1	0	1
443	EX_glyc-S(e)	(S)-Glycerate exchange	glyc-S[c] -->	0	1	0	1	0	1	0	1	0	1
444	EX_oagd3_hs(e)	9-O-Acetylated GD3 (homo sapiens) exchange	oagd3_hs[c] -->	0	1	0	1	0	1	0	1	0	1
445	EX_oagt3_hs(e)	9-O-Acetylated GT3 (homo sapiens) exchange	oagt3_hs[c] -->	0	1	0	1	0	1	0	1	0	1
446	EX_24nph(e)	2,4 dihydroxy nitrophenol exchange	24nph[c] -->	0	1	0	1	0	1	0	1	0	1
447	EX_whddca(e)	omega hydroxy dodecanoate (n-C12:0) exchange	whddca[c] -->	0	1	0	1	0	1	0	1	0	1
448	EX_whhdca(e)	omega hydroxy hexadecanoate (n-C16:0) exchange	whhdca[c] -->	0	1	0	1	0	1	0	1	0	1
449	EX_whtststerone(e)	w hydroxy testosterone exchange	whtststerone[c] -->	0	1	0	1	0	1	0	1	0	1
450	EX_whttdca(e)	omega hydroxy tetradecanoate (n-C14:0) exchange	whttdca[c] -->	0	1	0	1	0	1	0	1	0	1
451	EX_acgalfucgalacgalfuc12gal14acglcgalgluside_hs(e)	Type IIIA glycolipid exchange	acgalfucgalacgalfuc12gal14acglcgalgluside_hs[c] -->	0	1	0	1	0	1	0	1	0	1
452	EX_xoltri24(e)	7-alpha,24(S)-Dihydroxycholesterol exchange	xoltri24[c] -->	0	1	0	1	0	1	0	1	0	1
453	EX_xoltri25(e)	7-alpha,25-Dihydroxycholesterol exchange	xoltri25[c] -->	0	1	0	1	0	1	0	1	0	1
454	EX_xoltri27(e)	7-alpha,27-Dihydroxycholesterol exchange	xoltri27[c] -->	0	1	0	1	0	1	0	1	0	1
455	EX_dgchol(e)	Chenodeoxyglycocholate exchange	dgchol[c] -->	0	1	0	1	0	1	0	1	0	1
456	EX_omeprazole(e)	omeprazole exchange	omeprazole[c] -->	0	1	0	1	0	1	0	1	0	1
457	EX_onpthl(e)	naphthalene epoxide exchange	onpthl[c] -->	0	1	0	1	0	1	0	1	0	1
458	EX_2mcit(e)	2-Methylcitrate exchange	2mcit[c] -->	0	1	0	1	7.09485e-05	1	0.000361154	1	0.000579174	1
459	EX_n2m2nmasn(e)	N-Acetyl-beta-D-glucosaminyl-1,2-alpha-D-mannosyl-1,3-(N-acetyl-beta-D-glucosaminyl-1,2-alpha-D-mannosyl-1,6)-(N-acetyl-beta-D-glucosaminyl-1,4)-beta-D-mannosyl-1,4-N-acetyl-beta-D-glucosaminyl-R exchange	n2m2nmasn[c] -->	0	1	0	1	0	1	0	1	0	1
460	EX_bz(e)	Benzoate exchange	bz[c] -->	0	1	0	1	0	1	0	1	0	1
461	EX_spc_hs(e)	sphingosylphosphorylcholine (homo sapiens) exchange	spc_hs[c] -->	0	1	0	1	0	1	0	1	0	1
462	ENO	enolase	[c] : 2pg <==> h2o + pep	-8.06949	0.0244094	-5.16252	0.0985032	4.88483	0.101423	29.4503	0.663247	58.6565	0.625524
463	FBA	fructose-bisphosphate aldolase	[c] : fdp <==> dhap + g3p	1.44432	0.253815	6.28297	0.701227	11.9823	0.949916	20.0104	0.750129	29.214	0.874301
464	HEX1	hexokinase (D-glucose:ATP)	[c] : atp + glc-D --> adp + g6p + h	1.12405	0.381869	4.81839	0.41456	9.17976	0.857864	15.6494	0.124348	22.1433	0.621832
465	FBP	fructose-bisphosphatase	[c] : fdp + h2o --> f6p + pi	0	1	0	1	0	1	0	1	0	1
466	GAPD	glyceraldehyde-3-phosphate dehydrogenase	[c] : g3p + nad + pi <==> 13dpg + h + nadh	4.001	0.0214368	17.4323	0.146481	33.3695	0.370047	54.8147	0.617817	78.4808	0.722165
467	PYK	pyruvate kinase	[c] : adp + h + pep --> atp + pyr	0	1	0.101813	1	7.38973	0.414362	30.9116	0.561321	59.6895	0.541516
468	PFK	phosphofructokinase	[c] : atp + f6p --> adp + fdp + h	1.44432	0.253815	6.28297	0.701227	11.9823	0.949916	20.0104	0.750129	29.214	0.874301
469	MGSA	methylglyoxal synthase	[c] : dhap --> mthgxl + pi	0	1	0	1	0	1	0	1	0	1
470	PGI	glucose-6-phosphate isomerase	[c] : g6p <==> f6p	1.12405	0.381869	4.81839	0.41456	9.17976	0.857864	15.6494	0.124348	22.1433	0.53659
471	PGM	phosphoglycerate mutase	[c] : 2pg <==> 3pg	8.06949	0.0244094	5.16252	0.0985032	-4.88483	0.101423	-29.4503	0.663247	-58.6565	0.625524
472	PGK	phosphoglycerate kinase	[c] : 3pg + atp <==> 13dpg + adp	-4.001	0.0214368	-17.4323	0.146481	-33.3695	0.370047	-54.8147	0.617817	-78.4808	0.722165
473	TPI	triose-phosphate isomerase	[c] : dhap <==> g3p	2.00088	0.0214368	8.71652	0.146481	16.6851	0.370047	27.4077	0.617817	39.2408	0.722165
474	GND	phosphogluconate dehydrogenase	[c] : 6pgc + nadp --> co2 + nadph + ru5p-D	0	1	0	1	2.40904e-06	1	8.65617e-06	1	2.9e-05	1
475	PGL	6-phosphogluconolactonase	[c] : 6pgl + h2o --> 6pgc + h	0	1	0	1	2.40904e-06	1	8.65617e-06	1	2.9e-05	1
476	RPI	ribose-5-phosphate isomerase	[c] : r5p <==> ru5p-D	-0.001527	1	-0.001527	1	-0.0015278	1	-0.00152989	1	-0.00153667	1
477	RPE	ribulose 5-phosphate 3-epimerase	[c] : ru5p-D <==> xu5p-D	-0.001527	1	-0.001527	1	-0.00152539	1	-0.00152123	1	-0.00150767	1
478	TALA	transaldolase	[c] : g3p + s7p <==> e4p + f6p	-0.000764	1	-0.000764	1	-0.000763197	1	-0.000761113	1	-0.000754329	1
479	TKT1	transketolase	[c] : r5p + xu5p-D <==> g3p + s7p	-0.000764	1	-0.000764	1	-0.000763197	1	-0.000761113	1	-0.000754329	1
480	TKT2	transketolase	[c] : e4p + xu5p-D <==> f6p + g3p	-0.000764	1	-0.000764	1	-0.000763197	1	-0.000761113	1	-0.000754329	1
481	ACONT	aconitase	[c] : cit <==> icit	6.1309	0.804097	7.24909	0.765172	6.61826	0.996175	4.32668	1	3.34317	0.999932
482	ACS	acetyl-CoA synthetase	[c] : ac + atp + coa --> accoa + amp + ppi	0	1	0	1	0	1	0	1	0	1
483	FDH	formate dehydrogenase	[c] : for + nad --> co2 + nadh	1.70218	1	2.9172	0.999999	3.8998	0.999614	4.0331	0.999815	2.99466	0.999964
484	LDH_D	D-lactate dehydrogenase	[c] : lac-D + nad <==> h + nadh + pyr	0.0613715	1	0.0209323	1	-2.54572	0.95982	-9.9489	0.834271	-21.3955	0.96503
485	LDH_L	L-lactate dehydrogenase	[c] : lac-L + nad <==> h + nadh + pyr	17.3363	0.262666	13.4101	0.762675	6.59921	0.921138	-5.37806	0.634427	-19.5608	0.525702
486	PPA	inorganic diphosphatase	[c] : h2o + ppi --> h + (2) pi	0.00165915	1	0.00534815	1	0.0411353	0.174983	0.0726371	0.767953	0.0847561	0.112081
487	ME2	malic enzyme (NADP)	[c] : mal-L + nadp --> co2 + nadph + pyr	0	1	0	1	0.00568061	1	0.0104583	1	0.0130364	1
488	TRDR	thioredoxin reductase (NADPH)	[c] : h + nadph + trdox --> nadp + trdrd	0	1	0	1	0	1	0	1	0	1
489	GALK	galactokinase	[c] : atp + gal --> adp + gal1p + h	0	1	0	1	0	1	0	1	0	1
490	GALT	galactose-1-phosphate uridylyltransferase	[c] : gal1p + h + utp <==> ppi + udpgal	0	1	0	1	0	1	0	1	0	1
491	UDPG4E	UDPglucose 4-epimerase	[c] : udpg <==> udpgal	0	1	0	1	0	1	0	1	0	1
492	GALU	UTP-glucose-1-phosphate uridylyltransferase	[c] : g1p + h + utp <==> ppi + udpg	0	1	0	1	0	1	0	1	0	1
493	PGMT	phosphoglucomutase	[c] : g1p <==> g6p	0	1	0	1	0	1	0	1	0	1
494	PMANM	phosphomannomutase	[c] : man1p <==> man6p	0	1	0	1	0	1	0	1	0	1
495	MAN6PI	mannose-6-phosphate isomerase	[c] : man6p <==> f6p	0	1	0	1	0	1	0	1	0	1
496	G6PDA	glucosamine-6-phosphate deaminase	[c] : gam6p + h2o --> f6p + nh4	0	1	0	1	0	1	0	1	0	1
497	ALDD2x	aldehyde dehydrogenase (acetaldehyde, NAD)	[c] : acald + h2o + nad --> ac + (2) h + nadh	0	1	0	1	0	1	0	1	0	1
498	ALDD2y	aldehyde dehydrogenase (acetaldehyde, NADP)	[c] : acald + h2o + nadp --> ac + (2) h + nadph	0	1	0	1	0	1	0	1	0	1
499	XYLK	xylulokinase	[c] : atp + xylu-D --> adp + h + xu5p-D	0	1	0	1	0	1	0	1	0	1
500	RBK	ribokinase	[c] : atp + rib-D --> adp + h + r5p	0	1	0	1	0	1	0	1	0	1
501	GLYK	glycerol kinase	[c] : atp + glyc --> adp + glyc3p + h	0.0927184	1	0.0873022	1	0.0518156	1	0.102197	1	0.225721	1
502	G3PD1	glycerol-3-phosphate dehydrogenase (NAD)	[c] : glyc3p + nad <==> dhap + h + nadh	-0.0948459	1	-0.22852	0.983205	-0.524339	1	-0.666964	1	-0.280323	1
503	PPM	phosphopentomutase	[c] : r1p <==> r5p	0.000344905	0.99996	0.000432327	0.999964	0.000210644	1	5.99471e-05	1	2.94593e-05	1
504	DRPA	deoxyribose-phosphate aldolase	[c] : 2dr5p --> acald + g3p	0	1	0	1	0	1	0	1	0	1
505	ASNS1	asparagine synthase (glutamine-hydrolysing)	[c] : asp-L + atp + gln-L + h2o --> amp + asn-L + glu-L + h + ppi	0.0231361	0.107625	0.0293622	0.570507	0.0328098	0.290325	0.0334071	1	0.0334767	1
506	ASPTA	aspartate transaminase	[c] : akg + asp-L <==> glu-L + oaa	-2.33325	0.472766	-2.35349	0.56344	-2.58956	0.991279	-2.18321	0.37733	-1.66324	0.917704
507	ALAR	alanine racemase	[c] : ala-L <==> ala-D	0	1	0	1	0.0923803	1	0.273585	1	0.44831	1
508	ALATA_L	L-alanine transaminase	[c] : akg + ala-L <==> glu-L + pyr	-0.0482002	0.107625	-0.0686038	0.570507	-0.462083	0.290325	-1.30662	0.999998	-1.49594	1
509	MTRI	5-methylthioribose-1-phosphate isomerase	[c] : 5mdr1p <==> 5mdru1p	0	1	0	1	0	1	0	1	0	1
510	ADMDC	adenosylmethionine decarboxylase	[c] : amet + h --> ametam + co2	0	1	0	1	0	1	0	1	0	1
511	ARGSL	argininosuccinate lyase	[c] : argsuc <==> arg-L + fum	0.0803336	0.107625	0.101952	0.570507	0.113923	0.290325	0.115996	1	0.116238	1
512	ARGSS	argininosuccinate synthase	[c] : asp-L + atp + citr-L --> amp + argsuc + h + ppi	0.0803336	0.107625	0.101952	0.570507	0.113923	0.290325	0.115996	1	0.116238	1
513	CBPS	carbamoyl-phosphate synthase (glutamine-hydrolysing)	[c] : (2) atp + gln-L + h2o + hco3 --> (2) adp + cbp + glu-L + (2) h + pi	0.000827	1	0.000827	1	0.000827	1	0.000827	1	0.000827	1
514	SPMS	spermidine synthase	[c] : ametam + ptrc --> 5mta + h + spmd	0	1	0	1	0	1	0	1	0	1
515	ILETA	isoleucine transaminase	[c] : akg + ile-L <==> 3mop + glu-L	2.75475	0.892176	5.72055	0.988122	7.66678	1	6.62659	0.959183	5.61669	0.737738
516	VALTA	valine transaminase	[c] : akg + val-L <==> 3mob + glu-L	2.54442	0.999999	5.60192	0.999597	7.23295	0.999746	6.41397	0.342126	4.84194	0.366015
517	THRD_L	L-threonine deaminase	[c] : thr-L --> 2obut + nh4	0	1	0	1	0	1	0.155185	1	0	1
518	TYRTA	tyrosine transaminase	[c] : akg + tyr-L <==> 34hpp + glu-L	0	1	0	1	8.58307e-05	1	0.000790107	1	0	1
519	PHETA1	phenylalanine transaminase	[c] : akg + phe-L <==> glu-L + phpyr	0	1	0	1	0	1	0	1	0	1
520	PRPPS	phosphoribosylpyrophosphate synthetase	[c] : atp + r5p <==> amp + h + prpp	0.0026359	0.99996	0.00272332	0.999964	0.00250164	1	0.00235095	1	0.00232046	1
521	PGCD	phosphoglycerate dehydrogenase	[c] : 3pg + nad --> 3php + h + nadh	12.0705	0.123654	22.5948	0.508012	28.4846	0.144578	25.3644	0.801803	19.8242	0.795608
522	PSP_L	phosphoserine phosphatase (L-serine)	[c] : h2o + pser-L --> pi + ser-L	12.0705	0.123654	22.5948	0.508012	28.4846	0.144578	25.3644	0.801803	19.8242	0.795608
523	SADT	sulfate adenylyltransferase	[c] : atp + h + so4 --> aps + ppi	0	1	0	1	0	1	0	1	0	1
524	ADSK	adenylyl-sulfate kinase	[c] : aps + atp --> adp + h + paps	0	1	0	1	0	1	0	1	0	1
525	BPNT	3',5'-bisphosphate nucleotidase	[c] : h2o + pap --> amp + pi	0	1	0	1	0	1	0	1	0	1
526	THRS	threonine synthase	[c] : h2o + phom --> pi + thr-L	0	1	0	1	0	1	0	1	0	1
527	AHC	adenosylhomocysteinase	[c] : ahcys + h2o <==> adn + hcys-L	0.0116484	0.107625	0.0147831	0.570507	0.0165186	0.290325	0.0168192	1	0.0168543	1
528	METAT	methionine adenosyltransferase	[c] : atp + h2o + met-L --> amet + pi + ppi	0.0116484	0.107625	0.0147831	0.570507	0.0165186	0.290325	0.0168192	1	0.0168543	1
529	ARGN	arginase	[c] : arg-L + h2o --> orn + urea	0	1	0	1	0	1	0	1	0	1
530	HISD	histidase	[c] : his-L --> nh4 + urcan	0.591662	0.123654	0.758721	0.570507	1.58723	0.521046	3.9325	0.98976	6.20845	0.678157
531	URCN	urocanase	[c] : h2o + urcan --> 4izp	0.591662	0.123654	0.758721	0.570507	1.58723	0.521046	3.9325	0.98976	6.20845	0.678157
532	ADSL1	adenylosuccinate lyase	[c] : dcamp --> amp + fum	4.7e-05	1	4.7e-05	1	4.7e-05	1	4.7e-05	1	4.7e-05	1
533	ADSL2	adenylosuccinate lyase	[c] : 25aics --> aicar + fum	0.001463	1	0.001463	1	0.001463	1	0.001463	1	0.001463	1
534	AICART	phosphoribosylaminoimidazolecarboxamide formyltransferase	[c] : 10fthf + aicar <==> fprica + thf	0.001463	1	0.001463	1	0.001463	1	0.001463	1	0.001463	1
535	IMPC	IMP cyclohydrolase	[c] : h2o + imp <==> fprica	-0.001463	1	-0.001463	1	-0.001463	1	-0.001463	1	-0.001463	1
536	IMPD	IMP dehydrogenase	[c] : h2o + imp + nad --> h + nadh + xmp	0.001417	1	0.001417	1	0.001417	1	0.001417	1	0.001417	1
537	CTPS2	CTP synthase (glutamine)	[c] : atp + gln-L + h2o + utp --> adp + ctp + glu-L + (2) h + pi	0	1	0	1	0	1	0	1	0	1
538	DHORTS	dihydroorotase	[c] : dhor-S + h2o <==> cbasp + h	-0.000827	1	-0.000827	1	-0.000827	1	-0.000827	1	-0.000827	1
539	OMPDC	orotidine-5'-phosphate decarboxylase	[c] : h + orot5p --> co2 + ump	0.000827	1	0.000827	1	0.000827	1	0.000827	1	0.000827	1
540	ORPT	orotate phosphoribosyltransferase	[c] : orot5p + ppi <==> orot + prpp	-0.000827	1	-0.000827	1	-0.000827	1	-0.000827	1	-0.000827	1
541	NTD1	5'-nucleotidase (dUMP)	[c] : dump + h2o --> duri + pi	0	1	0	1	0	1	0	1	0	1
542	NTD2	5'-nucleotidase (UMP)	[c] : h2o + ump --> pi + uri	0	1	0	1	0	1	0	1	0	1
543	NTD3	5'-nucleotidase (dCMP)	[c] : dcmp + h2o --> dcyt + pi	0	1	0	1	0	1	0	1	0	1
544	NTD4	5'-nucleotidase (CMP)	[c] : cmp + h2o --> cytd + pi	0	1	0	1	0	1	0	1	0	1
545	NTD5	5'-nucleotidase (dTMP)	[c] : dtmp + h2o --> pi + thymd	0	1	0	1	0	1	0	1	0	1
546	NTD6	5'-nucleotidase (dAMP)	[c] : damp + h2o --> dad-2 + pi	0	1	0	1	0	1	0	1	0	1
547	NTD7	5'-nucleotidase (AMP)	[c] : amp + h2o --> adn + pi	0	1	0	1	0	1	0	1	0	1
548	NTD8	5'-nucleotidase (dGMP)	[c] : dgmp + h2o --> dgsn + pi	0	1	0	1	0	1	0	1	0	1
549	NTD9	5'-nucleotidase (GMP)	[c] : gmp + h2o --> gsn + pi	0	1	0	1	0	1	0	1	0	1
550	NTD10	5'-nucleotidase (XMP)	[c] : h2o + xmp --> pi + xtsn	0	1	0	1	0	1	0	1	0	1
551	NTD11	5'-nucleotidase (IMP)	[c] : h2o + imp --> ins + pi	0	1	0	1	0	1	0	1	0	1
552	ADPT	adenine phosphoribosyltransferase	[c] : ade + prpp --> amp + ppi	0.000344905	0.99996	0.000432327	0.999964	0.000210644	1	5.99471e-05	1	2.94593e-05	1
553	ADNK1	adenosine kinase	[c] : adn + atp --> adp + amp + h	0.0113035	0.135388	0.0143507	0.339224	0.0163079	0.326126	0.0167593	1	0.0168248	1
554	ADK1	adenylate kinase	[c] : amp + atp <==> (2) adp	0.000956422	1	0.00345831	0.999964	0.0256332	0.383557	0.0440368	0.646196	0.0536273	0.55197
555	CYTK1	cytidylate kinase (CMP)	[c] : atp + cmp <==> adp + cdp	-6.4347e-05	0.859033	8.75726e-05	0.713572	0.000925096	0.987363	0.00375868	0.999211	0.00358136	1
556	CYTK2	cytidylate kinase (dCMP)	[c] : atp + dcmp <==> adp + dcdp	6.86148e-05	0.999996	0.000238993	0.999997	0.00244525	0.999991	0.00324069	0.965803	0.00301548	0.999424
557	UMPK	UMP kinase	[c] : atp + ump <==> adp + udp	0.000156877	1	0.000259631	1	0.00221063	1	0.00393655	0.999985	0.00425551	1
558	GK1	guanylate kinase (GMP:ATP)	[c] : atp + gmp <==> adp + gdp	0	1	0	1	0	1	0	1	0	1
559	DGK1	deoxyguanylate kinase (dGMP:ATP)	[c] : atp + dgmp <==> adp + dgdp	0	1	0	1	0	1	0	1	0	1
560	DTMPK	dTMP kinase	[c] : atp + dtmp <==> adp + dtdp	0	1	0	1	0	1	0	1	0	1
561	NDPK1	nucleoside-diphosphate kinase (ATP:GDP)	[c] : atp + gdp <==> adp + gtp	0.000444424	0.999712	0.00106654	0.999877	0.00891573	0.999023	0.0170175	0.934164	0.01856	1
562	NDPK2	nucleoside-diphosphate kinase (ATP:UDP)	[c] : atp + udp <==> adp + utp	0.000327036	0.978708	0.00035333	0.971211	0.00100743	0.997328	0.00119006	0.993612	0.00152647	1
563	NDPK3	nucleoside-diphosphate kinase (ATP:CDP)	[c] : atp + cdp <==> adp + ctp	-0.000173464	0.772582	-0.000173357	0.758917	-3.16614e-05	0.818278	0.00133548	0.798488	0.00128827	0.914692
564	NDPK4	nucleoside-diphosphate kinase (ATP:dTDP)	[c] : atp + dtdp <==> adp + dttp	0	1	0	1	0	1	0	1	0	1
565	NDPK5	nucleoside-diphosphate kinase (ATP:dGDP)	[c] : atp + dgdp <==> adp + dgtp	-3.64393e-06	0.99999	7.03276e-05	0.999998	0.000548999	0.999912	0.00111054	0.991908	0.00108452	1
566	NDPK6	nucleoside-diphosphate kinase (ATP:dUDP)	[c] : atp + dudp <==> adp + dutp	0	1	0	1	0	1	0	1	0	1
567	NDPK7	nucleoside-diphosphate kinase (ATP:dCDP)	[c] : atp + dcdp <==> adp + dctp	-8.82347e-06	1	0.000137055	1	0.00070661	1	0.000634339	1	0.0013855	1
568	NDPK8	nucleoside-diphosphate kinase (ATP:dADP)	[c] : atp + dadp <==> adp + datp	2.97693e-06	1	2.93952e-06	1	0.00037355	1	0.00129742	1	0.00150349	0.999999
569	PUNP1	purine-nucleoside phosphorylase (Adenosine)	[c] : adn + pi <==> ade + r1p	0.000344905	0.99996	0.000432327	0.999964	0.000210644	1	5.99471e-05	1	2.94593e-05	1
570	PUNP2	purine-nucleoside phosphorylase (Deoxyadenosine)	[c] : dad-2 + pi <==> 2dr1p + ade	0	1	0	1	0	1	0	1	0	1
571	PUNP3	purine-nucleoside phosphorylase (Guanosine)	[c] : gsn + pi <==> gua + r1p	0	1	0	1	0	1	0	1	0	1
572	PUNP4	purine-nucleoside phosphorylase (Deoxyguanosine)	[c] : dgsn + pi <==> 2dr1p + gua	0	1	0	1	0	1	0	1	0	1
573	PUNP5	purine-nucleoside phosphorylase (Inosine)	[c] : ins + pi <==> hxan + r1p	0	1	0	1	0	1	0	1	0	1
574	PUNP6	purine-nucleoside phosphorylase (Deoxyinosine)	[c] : din + pi <==> 2dr1p + hxan	0	1	0	1	0	1	0	1	0	1
575	PUNP7	purine-nucleoside phosphorylase (Xanthosine)	[c] : pi + xtsn <==> r1p + xan	0	1	0	1	0	1	0	1	0	1
576	RNDR1	ribonucleoside-diphosphate reductase (ADP)	[c] : adp + trdrd --> dadp + h2o + trdox	0	1	0	1	0	1	0	1	0	1
577	RNDR2	ribonucleoside-diphosphate reductase (GDP)	[c] : gdp + trdrd --> dgdp + h2o + trdox	0	1	0	1	0	1	0	1	0	1
578	RNDR3	ribonucleoside-diphosphate reductase (CDP)	[c] : cdp + trdrd --> dcdp + h2o + trdox	0	1	0	1	0	1	0	1	0	1
579	RNDR4	ribonucleoside-diphosphate reductase (UDP)	[c] : trdrd + udp --> dudp + h2o + trdox	0	1	0	1	0	1	0	1	0	1
580	TMDS	thymidylate synthase	[c] : dump + mlthf --> dhf + dtmp	0	1	0	1	0	1	0	1	0	1
581	TMDK1	thymidine kinase (ATP:thymidine)	[c] : atp + thymd --> adp + dtmp + h	0	1	0	1	0	1	0	1	0	1
582	DURIK1	deoxyuridine kinase (ATP:Deoxyuridine)	[c] : atp + duri --> adp + dump + h	0	1	0	1	0	1	0	1	0	1
583	TMDPP	thymidine phosphorylase	[c] : pi + thymd <==> 2dr1p + thym	0	1	0	1	0	1	0	1	0	1
584	URIK1	uridine kinase (ATP:Uridine)	[c] : atp + uri --> adp + h + ump	0	1	0	1	0	1	0	1	0	1
585	CYTDK1	cytidine kinase (ATP)	[c] : atp + cytd --> adp + cmp + h	0	1	0	1	0	1	0	1	0	1
586	HXPRT	hypoxanthine phosphoribosyltransferase (Hypoxanthine)	[c] : hxan + prpp --> imp + ppi	0	1	0	1	0	1	0	1	0	1
587	DMATT	dimethylallyltranstransferase	[c] : dmpp + ipdp --> grdp + ppi	0	1	0	1	0	1	0	1	0	1
588	GRTT	geranyltranstransferase	[c] : grdp + ipdp --> frdp + ppi	0	1	0	1	0	1	0	1	0	1
589	FRTT	farnesyltranstransferase	[c] : frdp + ipdp --> ggdp + ppi	0	1	0	1	0	1	0	1	0	1
590	RBFK	riboflavin kinase	[c] : atp + ribflv --> adp + fmn + h	0	1	0	1	0	1	0	1	0	1
591	ACP1(FMN)	acid phosphatase (FMN)	[c] : fmn + h2o --> pi + ribflv	0	1	0	1	0	1	0	1	0	1
592	DNADDP	Deaminido NAD diphosphatase	[c] : dnad + h2o --> amp + (2) h + nicrnt	0	1	0	1	0	1	0	1	0	1
593	DHFR	dihydrofolate reductase	[c] : dhf + h + nadph <==> nadp + thf	7.47851	0.951814	12.1453	0.997295	15.1989	0.999995	14.9834	1	14.7147	0.999992
594	LEUTA	leucine transaminase	[c] : akg + leu-L <==> 4mop + glu-L	2.5325	0.956354	5.46088	0.996095	7.03009	0.999999	5.98378	0.999923	4.33103	0.999338
595	PNTK	pantothenate kinase	[c] : atp + pnto-R --> 4ppan + adp + h	0	1	0	1	0	1	0	1	0	1
596	PPCDC	phosphopantothenoylcysteine decarboxylase	[c] : 4ppcys + h --> co2 + pan4p	0	1	0	1	0	1	0	1	0	1
597	PTPAT	pantetheine-phosphate adenylyltransferase	[c] : atp + h + pan4p <==> dpcoa + ppi	0	1	0	1	0	1	0	1	0	1
598	DPCOAK	dephospho-CoA kinase	[c] : atp + dpcoa --> adp + coa + h	0	1	0	1	0	1	0	1	0	1
599	DHPM1	dihydropyrimidinase (5,6-dihydrouracil)	[c] : 56dura + h2o --> cala + h	0	1	0	1	0	1	0	1	0	1
600	DHPM2	dihydropyrimidinase (dihydrothymine)	[c] : 56dthm + h2o --> 3uib + h	0	1	0	1	0	1	0	1	0	1
601	NADPN	NADP nucleosidase	[c] : h2o + nadp --> adprbp + h + ncam	0	1	0	1	0	1	0	1	0	1
602	NADN	NAD nucleosidase	[c] : h2o + nad --> adprib + h + ncam	0	1	0	1	0	1	0	1	0	1
603	NNAT	nicotinate-nucleotide adenylyltransferase	[c] : atp + h + nicrnt --> dnad + ppi	0	1	0	1	0	1	0	1	0	1
604	NADK	NAD kinase	[c] : atp + nad --> adp + h + nadp	0	1	0	1	0	1	0	1	0	1
605	NADS2	NAD synthase (glutamine-hydrolysing)	[c] : atp + dnad + gln-L + h2o --> amp + glu-L + h + nad + ppi	0	1	0	1	0	1	0	1	0	1
606	RBK_D	D-ribulokinase	[c] : atp + rbl-D --> adp + h + ru5p-D	0	1	0	1	0	1	0	1	0	1
607	FADDP	FAD diphosphatase	[c] : fad + h2o --> amp + fmn + (2) h	0	1	0	1	0	1	0	1	0	1
608	FMNAT	FMN adenylyltransferase	[c] : atp + fmn + h --> fad + ppi	0	1	0	1	0	1	0	1	0	1
609	NMNS	NMN synthetase	[c] : h + ncam + prpp --> nmn + ppi	0	1	0	1	0	1	0	1	0	1
610	RNMK	ribosylnicotinamide kinase	[c] : atp + rnam --> adp + h + nmn	0	1	0	1	0	1	0	1	0	1
611	DADNK	deoxyadenosine kinase	[c] : atp + dad-2 --> adp + damp + h	0	1	0	1	0	1	0	1	0	1
612	GUAPRT	guanine phosphoribosyltransferase	[c] : gua + prpp --> gmp + ppi	0	1	0	1	0	1	0	1	0	1
613	ACCOAC	acetyl-CoA carboxylase	[c] : accoa + atp + hco3 --> adp + h + malcoa + pi	0	1	0	1	0	1	0	1	0	1
614	ACACT1	acetyl-CoA C-acetyltransferase	[c] : (2) accoa --> aacoa + coa	0.059746	0.572387	0.0734696	0.150433	0.0628254	0.99813	0.0464668	0.999428	0.0424607	0.99998
615	HMBS	hydroxymethylbilane synthase	[c] : h2o + (4) ppbng --> hmbil + (4) nh4	0	1	0	1	0	1	0	1	0	1
616	UPP3S	uroporphyrinogen-III synthase	[c] : hmbil --> h2o + uppg3	0	1	0	1	0	1	0	1	0	1
617	UPPDC1	uroporphyrinogen decarboxylase (uroporphyrinogen III)	[c] : (4) h + uppg3 --> (4) co2 + cpppg3	0	1	0	1	0	1	0	1	0	1
618	PDHm	pyruvate dehydrogenase	[m] : coa + nad + pyr --> accoa + co2 + nadh	15.6	0.02292	9.97437	0.0175696	3.94942	0.0918784	1.18768	0.850197	0.404851	0.869507
619	CSm	citrate synthase	[m] : accoa + h2o + oaa --> cit + coa + h	0.390204	0.999995	0.33452	0.999937	0.17004	0.999938	0.0530722	1	0.00558256	1
620	NNDPR	nicotinate-nucleotide diphosphorylase (carboxylating)	[c] : (2) h + prpp + quln --> co2 + nicrnt + ppi	0	1	0	1	0	1	0	1	0	1
621	ASP1DC	aspartate 1-decarboxylase	[c] : asp-L + h --> ala-B + co2	0	1	0	1	0.0209596	1	0.0203697	1	0.000803467	1
622	ALCD1	alcohol dehydrogenase (methanol)	[c] : meoh + nad <==> fald + h + nadh	-9.79826	0.860725	-17.8642	0.682935	-22.8971	0.998159	-21.4127	0.853174	-18.4783	0.954413
623	ADPRDP	ADPribose diphosphatase	[c] : adprib + h2o --> amp + (2) h + r5p	0	1	0	1	0	1	0	1	0	1
624	ACONTm	Aconitate hydratase	[m] : cit <==> icit	-5.74642	0.818655	-6.92955	0.765172	-6.79736	0.654492	-5.31268	0.693209	-4.53869	0.468053
625	ICDHxm	Isocitrate dehydrogenase (NAD+)	[m] : icit + nad --> akg + co2 + nadh	0.89061	0.999978	0.892813	0.999975	0.949953	1	0.476898	1	0.406815	0.999822
626	ICDHyp	Isocitrate dehydrogenase (NADP+)	[x] : icit + nadp --> akg + co2 + nadph	0	1	0	1	0	1	0	1	0	1
627	SUCOAS1m	Succinate--CoA ligase (GDP-forming)	[m] : coa + gtp + succ <==> gdp + pi + succoa	-8.06949	0.0244094	-5.26433	0.0985032	-2.50483	0.330992	-1.46077	0.987072	-1.03507	0.97529
628	ME2m	malic enzyme (NADP), mitochondrial	[m] : mal-L + nadp --> co2 + nadph + pyr	0	1	0	1	0	1	0	1	0	1
629	MDH	malate dehydrogenase	[c] : mal-L + nad <==> h + nadh + oaa	2.32752	0.518286	2.3385	0.822789	2.34566	0.901093	1.51394	0.784313	0.889259	0.985922
630	FUM	fumarase	[c] : fum + h2o <==> mal-L	-3.52281	0.946209	-3.40752	0.975115	-2.66159	0.64594	-1.91042	0.996857	-1.11967	0.808482
631	MDHm	malate dehydrogenase, mitochondrial	[m] : mal-L + nad <==> h + nadh + oaa	-1.42843	0.289145	-1.3636	0.546847	-1.42418	0.88584	-0.690497	0.407888	-0.291467	0.810516
632	FUMm	fumarase, mitochondrial	[m] : fum + h2o <==> mal-L	4.4219	0.581704	4.38242	0.826783	3.58875	0.54396	2.74432	0.887458	1.7305	0.98164
633	HEX4	hexokinase (D-mannose:ATP)	[c] : atp + man --> adp + h + man6p	0	1	0	1	0	1	0	1	0	1
634	HEX7	hexokinase (D-fructose:ATP)	[c] : atp + fru --> adp + f6p + h	0.321791	0.471727	1.4661	0.484206	2.8041	0.639441	4.36256	0.187501	7.07224	0.592136
635	HEX10	hexokinase (D-glucosamine:ATP)	[c] : atp + gam --> adp + gam6p + h	0	1	0	1	0	1	0	1	0	1
636	MALT	alpha-glucosidase	[c] : h2o + malt --> (2) glc-D	0	1	0	1	0	1	0	1	0	1
637	TREH	alpha,alpha-trehalase	[c] : h2o + tre --> (2) glc-D	0	1	0	1	0	1	0	1	0	1
638	PFK26	6-phosphofructo-2-kinase	[c] : atp + f6p --> adp + f26bp + h	0	1	0	1	0	1	0	1	0	1
639	ACSm	acetyl-CoA synthetase	[m] : ac + atp + coa --> accoa + amp + ppi	0	1	0	1	0	1	0	1	0	1
640	GLYOX	hydroxyacylglutathione hydrolase	[c] : h2o + lgt-S --> gthrd + h + lac-D	0	1	0	1	0	1	0	1	0	1
641	GLYOXm	hydroxyacylglutathione hydrolase, mitochondrial	[m] : h2o + lgt-S --> gthrd + h + lac-D	0	1	0	1	0	1	0	1	0	1
642	LGTHL	lactoylglutathione lyase	[c] : gthrd + mthgxl --> lgt-S	0.174113	1	0.276239	1	0.443669	1	0.66516	1	0.502246	1
643	PPAm	inorganic diphosphatase	[m] : h2o + ppi --> h + (2) pi	0	1	0	1	0	1	0	1	0	1
644	UAGDP	UDP-N-acetylglucosamine diphosphorylase	[c] : acgam1p + h + utp --> ppi + uacgam	0	1	0	1	0	1	0	1	0	1
645	FBP26	Fructose-2,6-bisphosphate 2-phosphatase	[c] : f26bp + h2o --> f6p + pi	0	1	0	1	0	1	0	1	0	1
646	UNK2	2-keto-4-methylthiobutyrate transamination	[c] : 2kmb + gln-L + h --> glu-L + met-L	0	1	0	1	0	1	0	1	0	1
647	NDP6	nucleoside-diphosphatase (dCDP)	[c] : dcdp + h2o --> dcmp + h + pi	0	1	0	1	0	1	0	1	0	1
648	NDP8	nucleoside-diphosphatase (dUDP)	[c] : dudp + h2o --> dump + h + pi	0	1	0	1	0	1	0	1	0	1
649	CO2tm	CO2 transport (diffusion), mitochondrial	co2[c] <==> co2[m]	-23.4553	0.0611222	-27.12	0.169141	-27.1465	0.563044	-22.9641	0.755974	-17.1088	0.693185
650	PIt2m	phosphate transporter, mitochondrial	h[c] + pi[c] <==> h[m] + pi[m]	6.48378	0.0189583	7.09552	0.124264	8.10342	0.848709	8.185	0.995609	6.37651	0.754231
651	PYRt2m	pyruvate mitochondrial transport via proton symport	h[c] + pyr[c] <==> h[m] + pyr[m]	21.1455	0.0819383	16.0077	0.301553	11.5057	0.550573	9.44165	0.924498	7.64548	0.947766
652	H2Otm	H2O transport, mitochondrial	h2o[c] <==> h2o[m]	-14.8869	0.291554	-14.4299	0.469229	-12.2606	0.245439	-8.27646	0.58801	-5.9175	0.861493
653	CITtbm	citrate transport, mitochondrial	cit[c] + pep[m] <==> cit[m] + pep[c]	8.06949	0.0244094	5.26433	0.0985032	2.50475	0.330992	1.45971	0.987072	1.032	0.97529
654	PSERT	phosphoserine transaminase	[c] : 3php + glu-L --> akg + pser-L	12.0705	0.123654	22.5948	0.508012	28.4846	0.144578	25.3644	0.801803	19.8242	0.795608
655	SUCOASm	Succinate--CoA ligase (ADP-forming)	[m] : atp + coa + succ <==> adp + pi + succoa	0	1	0	1	-8.00158e-05	1	-0.00590303	1	-0.00535725	1
656	MALtm	malate transport, mitochondrial	mal-L[c] + pi[m] <==> mal-L[m] + pi[c]	-3.95859	0.598502	-0.572234	0.974523	2.57643	0.986583	3.83955	0.834961	3.40316	0.893057
657	HCO3Em	HCO3 equilibration reaction	[m] : co2 + h2o <==> h + hco3	5.53748	0.683982	3.47269	0.929543	1.34079	0.596347	0.366842	1	0.13581	0.918927
658	DPGase	Diphosphoglycerate phosphatase	[c] : 23dpg + h2o --> 3pg + pi	0	1	0	1	0	1	0	1	0	1
659	O2tm	O2 transport (diffusion)	o2[c] <==> o2[m]	3.75388	0.66456	2.75441	0.39215	1.92567	0.576439	1.10601	0.471689	0.727429	0.971017
660	CITtam	citrate transport, mitochondrial	cit[c] + mal-L[m] <==> cit[m] + mal-L[c]	-14.2061	0.353867	-12.5284	0.0983151	-9.47215	0.0751506	-6.82546	0.997707	-5.57627	0.981846
661	H2Otn	H2O transport, nuclear	h2o[n] <==> h2o[c]	0	1	0	1	-0.000179192	1	-0.000349385	1	-0.000262291	1
662	H2CO3D	carboxylic acid dissociation	[c] : co2 + h2o <==> h2co3	9.63585	0.685936	10.7191	0.68097	10.6028	0.896166	9.47626	0.738352	7.53756	0.667639
663	UGLT	UDPglucose--hexose-1-phosphate uridylyltransferase	[c] : gal1p + udpg <==> g1p + udpgal	0	1	0	1	0	1	0	1	0	1
664	SUCD1m	succinate dehydrogenase	[m] : fad + succ <==> fadh2 + fum	0.781799	0.828614	0.426841	0.892692	0.503239	0.946758	0.767042	0.99027	0.601021	0.690071
665	G6PDH2r	glucose 6-phosphate dehydrogenase	[c] : g6p + nadp <==> 6pgl + h + nadph	0	1	0	1	2.40904e-06	1	8.65617e-06	1	2.9e-05	1
666	ME1m	malic enzyme (NAD), mitochondrial	[m] : mal-L + nad --> co2 + nadh + pyr	0	1	0	1	0	1	0	1	0	1
667	LCADi	lactaldehyde dehydrogenase	[c] : h2o + lald-L + nad --> (2) h + lac-L + nadh	0.00545659	1	0.000849608	1	0	1	0	1	0	1
668	ALCD2if	alcohol dehydrogenase, forward rxn (ethanol -> acetaldehyde)	[c] : etoh + nad --> acald + h + nadh	0	1	0	1	0	1	0	1	0	1
669	ORNDC	Ornithine Decarboxylase	[c] : h + orn --> co2 + ptrc	0	1	0	1	0	1	0	1	0	1
670	ABUTD	Aminobutyraldehyde dehydrogenase	[c] : 4abutn + h2o + nad --> 4abut + (2) h + nadh	0	1	0	1	0	1	0	1	0	1
671	GLUDC	Glutamate Decarboxylase	[c] : glu-L + h --> 4abut + co2	0	1	0	1	0.0299959	1	0.0921416	1	0.102713	1
672	L-LACtm	L-lactate transport, mitochondrial	h[c] + lac-L[c] <==> h[m] + lac-L[m]	2.14396	0.900563	-1.25409	0.93321	-5.79601	0.973309	-7.85698	0.818465	-7.16388	0.933149
673	GMPS2	GMP synthase	[c] : atp + gln-L + h2o + xmp --> amp + glu-L + gmp + (2) h + ppi	0.001417	1	0.001417	1	0.001417	1	0.001417	1	0.001417	1
674	D-LACtm	D-lactate transport, mitochondrial	h[c] + lac-D[c] <==> h[m] + lac-D[m]	0	1	0	1	0	1	0	1	0	1
675	ADK3	adentylate kinase (GTP)	[c] : amp + gtp <==> adp + gdp	0.000702731	1	0.00199612	1	0.0169002	0.999787	0.0318939	0.999303	0.0351875	0.994699
676	PYNP2r	pyrimidine-nucleoside phosphorylase (uracil)	[c] : pi + uri <==> r1p + ura	0	1	0	1	0	1	0	1	0	1
677	DURIPP	deoxyuridine phosphorylase	[c] : duri + pi <==> 2dr1p + ura	0	1	0	1	0	1	0	1	0	1
678	ALDD2xm	aldehyde dehydrogenase (acetylaldehyde, NAD), mitochondrial	[m] : acald + h2o + nad --> ac + (2) h + nadh	0	1	0	1	0	1	0	1	0	1
679	GLXtp	glyoxylate transport, peroxisomal	glx[c] <==> glx[x]	-0.0195285	1	-0.0410071	1	-0.0331977	1	-0.0358138	1	0	1
680	ACCOAtn	acetyl-CoA transport, nuclear	accoa[c] <==> accoa[n]	0	1	0	1	0	1	0	1	0	1
681	COAtn	coenzyme A transport, nuclear	coa[c] <==> coa[n]	0	1	0	1	0	1	0	1	0	1
682	ADK1m	adenylate kinase, mitochondrial	[m] : amp + atp <==> (2) adp	0	1	0	1	0	1	0	1	-0.000508758	1
683	ADK3m	adentylate kinase (GTP)	[m] : amp + gtp <==> adp + gdp	0	1	0	1	0	1	0	1	0.000508758	1
684	AIRCr	phosphoribosylaminoimidazole carboxylase	[c] : air + co2 <==> 5aizc + h	0.001463	1	0.001463	1	0.001463	1	0.001463	1	0.001463	1
685	TRDRm	thioredoxin reductase (NADPH)	[m] : h + nadph + trdox --> nadp + trdrd	0	1	0	1	0	1	0	1	0	1
686	NDPK9	nucleoside-diphosphate kinase (ATP:IDP)	[c] : atp + idp <==> adp + itp	0	1	0	1	0	1	0	1	0	1
687	UMPKn	UMP kinase, nuclear	[n] : atp + ump <==> adp + udp	0	1	0	1	0	1	0	1	0	1
688	ACGAMPM	phosphoacetylglucosamine mutase	[c] : acgam6p <==> acgam1p	0	1	0	1	0	1	0	1	0	1
689	ASPTAm	aspartate transaminase	[m] : akg + asp-L <==> glu-L + oaa	2.1986	0.472766	2.18323	0.793385	2.33867	0.936501	1.80629	0.483171	1.2523	0.996866
690	P450SCC1m	cholesterol monooxygenase	[m] : chsterol + h + nadph + o2 <==> 20ahchsterol + h2o + nadp	0	1	0	1	0	1	0	1	0	1
691	GHMT2rm	glycine hydroxymethyltransferase, reversible, mitochondrial	[m] : ser-L + thf <==> gly + h2o + mlthf	0	1	0	1	0	1	0	1	0	1
692	GHMT2r	glycine hydroxymethyltransferase, reversible	[c] : ser-L + thf <==> gly + h2o + mlthf	12.0243	0.129413	22.5362	0.523536	28.4191	0.144578	25.2977	0.801803	19.7574	0.795608
693	CYSTS	cystathionine beta-synthase	[c] : hcys-L + ser-L --> cyst-L + h2o	0.0116484	0.107625	0.0147831	0.570507	0.0165186	0.290325	0.0168192	1	0.0168543	1
694	DCT	Dopachrome tautomerase	[c] : L-dpchrm <==> 56dihindlcrbxlt	0	1	0	1	0	1	0	1	0	1
695	CYSTGL	cystathionine g-lyase	[c] : cyst-L + h2o --> 2obut + cys-L + nh4	0.0116484	0.107625	0.0147831	0.570507	0.0165186	0.290325	0.0168192	1	0.0168543	1
696	LEUTAm	leucine transaminase, mitochondrial	[m] : akg + leu-L <==> 4mop + glu-L	-2.5325	0.956354	-5.46088	0.996095	-7.03009	0.999999	-5.98378	0.999923	-4.33103	0.999338
697	ILETAm	isoleucine transaminase, mitochondrial	[m] : akg + ile-L <==> 3mop + glu-L	-2.75475	0.892176	-5.72055	0.988122	-7.66678	1	-6.62659	0.959183	-5.61669	0.737738
698	AGPRim	N-acetyl-g-glutamyl-phosphate reductase, irreversible, mitochondrial	[m] : acg5p + h + nadph --> acg5sa + nadp + pi	0	1	0	1	0	1	0	1	0	1
699	SPRMS	spermine synthase	[c] : ametam + spmd --> 5mta + h + sprm	0	1	0	1	0	1	0	1	0	1
700	TRPO2	L-Tryptophan:oxygen 2,3-oxidoreductase (decyclizing)	[c] : o2 + trp-L --> Lfmkynr	0	1	0	1	0	1	0	1	0	1
701	PCLAD	picolinic acid decarboxylase	[c] : cmusa + h --> am6sa + co2	0	1	0	1	0	1	0	1	0	1
702	AM6SAD	aminomuconate-semialdehyde dehydrogenase	[c] : am6sa + h2o + nad --> amuco + (2) h + nadh	0	1	0	1	0	1	0	1	0	1
703	TYRTAm	tyrosine transaminase, mitochondrial	[m] : akg + tyr-L <==> 34hpp + glu-L	0	1	0	1	0	1	0	1	0	1
704	GTHP	glutathione peroxidase	[c] : (2) gthrd + h2o2 <==> gthox + (2) h2o	1.25261	0.977045	2.01171	0.957451	2.54633	0.972008	2.44325	1	2.12727	0.999999
705	GTHO	glutathione oxidoreductase	[c] : gthox + h + nadph --> (2) gthrd + nadp	1.25469	0.977045	2.01296	0.957451	2.54753	0.972008	2.4439	1	2.12792	0.999999
706	APRTO2	N-acetylputrescine: oxygen oxireductase (deaminating)	[c] : aprut + h2o + o2 --> h2o2 + n4abutn + nh4	0	1	0	1	0	1	0	1	0	1
707	NABTNO	N4-Acetylaminobutanal:NAD+ oxidoreductase	[c] : h2o + n4abutn + nad --> 4aabutn + (2) h + nadh	0	1	0	1	0	1	0	1	0	1
708	ACACT1r	acetyl-CoA C-acetyltransferase	[c] : (2) accoa <==> aacoa + coa	0.0577653	0.422302	0.0713132	0.7633	0.0618099	0.211936	0.0475923	0.387135	0.0390302	0.267527
709	THFtm	5,6,7,8-Tetrahydrofolate transport, diffusion, mitochondrial	thf[c] <==> thf[m]	12.2449	0.112452	22.6082	0.493909	28.4929	0.309538	25.3431	0.711708	19.7079	0.769138
710	PROtm	L-proline transport, mitochondrial	pro-L[c] <==> pro-L[m]	-0.0251444	0.107625	-0.031911	0.570507	-0.0356576	0.290325	-0.0363067	1	-0.0363823	1
711	GLUt2m	L-glutamate reversible transport via proton symport, mitochondrial	glu-L[c] + h[c] <==> glu-L[m] + h[m]	-3.88827	0.378458	-5.36435	0.608791	-6.0137	0.32008	-5.6952	0.745432	-4.33573	0.981224
712	ACRNtm	O-acetylcarnintine transport into mitochondria via diffusion	acrn[c] --> acrn[m]	0	1	0	1	0	1	0	1	0	1
713	CRNtim	L-carnitine transport out of mitochondria via diffusion	crn[m] --> crn[c]	0	1	0	1	0	1	0	1	0	1
714	CPPPGO	coproporphyrinogen oxidase (O2 required)	[c] : cpppg3 + (2) h + o2 --> (2) co2 + (2) h2o + pppg9	0	1	0	1	0	1	0	1	0	1
715	EHGLAT	L-erythro-4-Hydroxyglutamate:2-oxoglutarate aminotransferase	[c] : akg + e4hglu --> 4h2oglt + glu-L	0	1	0	1	0	1	0	1	0	1
716	4HGLSDm	L-4-hydroxyglutamate semialdehyde dehydrogenase, mitochondrial	[m] : 4hglusa + h2o + nad <==> e4hglu + (2) h + nadh	0	1	0	1	0	1	0	1	0	1
717	EHGLATm	L-erythro-4-Hydroxyglutamate:2-oxoglutarate aminotransferase, mitochondrial	[m] : akg + e4hglu --> 4h2oglt + glu-L	0	1	0	1	0	1	0	1	0	1
718	CO2tn	CO2 nuclear transport via diffusion	co2[n] <==> co2[c]	0	1	0	1	0	1	0	1	0	1
719	H2O2tp	hydrogen peroxide peroxisomal transport via diffusion	h2o2[c] <==> h2o2[x]	-0.204432	1	-0.199906	1	-0.12216	1	-0.17168	1	-0.165131	1
720	COAtp	coenzyme A transport, peroxisomal	coa[c] <==> coa[x]	-0.235023	0.379899	-0.287869	0.297057	-0.204273	0.192351	-0.0948957	0.974857	-0.055527	0.627228
721	4ABUTtm	4-aminobutanoate mitochondrial transport via diffusion	4abut[c] <==> 4abut[m]	0	1	0	1	0	1	0	1	0.00021111	1
722	PYDXNK	pyridoxine kinase	[c] : atp + pydxn --> adp + h + pdx5p	0	1	0	1	0	1	0	1	0	1
723	PYDAMK	pyridoxamine kinase	[c] : atp + pydam --> adp + h + pyam5p	0	1	0	1	0	1	0	1	0	1
724	PYDXK	pyridoxal kinase	[c] : atp + pydx --> adp + h + pydx5p	0	1	0	1	0	1	0	1	0	1
725	PDX5PO	pyridoxine 5'-phosphate oxidase	[c] : o2 + pdx5p <==> h2o2 + pydx5p	0	1	0	1	0	1	0	1	0	1
726	HYPOE	hypothetical enyme	[c] : h2o + pyam5p --> pi + pydam	0	1	0	1	0	1	0	1	0	1
727	NNATm	nicotinate-nucleotide adenylyltransferase, mitochondrial	[m] : atp + h + nicrnt --> dnad + ppi	0	1	0	1	0	1	0	1	0	1
728	NMNATm	nicotinamide-nucleotide adenylyltransferase, mitochondrial	[m] : atp + h + nmn --> nad + ppi	0	1	0	1	0	1	0	1	0	1
729	ALASm	5-aminolevulinate synthase	[m] : gly + h + succoa --> 5aop + co2 + coa	0	1	0	1	0	1	0	1	0	1
730	DHFtm	dihydrofolate reversible mitochondrial transport	dhf[c] <==> dhf[m]	0	1	0	1	0	1	0	1	0	1
731	5AOPtm	5-Aminolevulinate mitochondrial transport	5aop[c] <==> 5aop[m]	0	1	0	1	0	1	0	1	0	1
732	PPPG9tm	protoporphyrinogen IX mitochondrial transport	pppg9[c] <==> pppg9[m]	0	1	0	1	0	1	0	1	0	1
733	FCLTm	Ferrochelatase, mitochondrial	[m] : fe2 + ppp9 --> (2) h + pheme	0	1	0	1	0	1	0	1	0	1
734	PYDXPP	Pyridoxal 5-phosphate phosphatase	[c] : h2o + pydx5p --> pi + pydx	0	1	0	1	0	1	0	1	0	1
735	PDXPP	Pyridoxine 5-phosphate phosphatase	[c] : h2o + pdx5p --> pi + pydxn	0	1	0	1	0	1	0	1	0	1
736	MDRPD	5-Methylthio-5-deoxy-D-ribulose 1-phosphate dehydratase	[c] : 5mdru1p --> dkmpp + h2o	0	1	0	1	0	1	0	1	0	1
737	DKMPPD	2,3-diketo-5-methylthio-1-phosphopentane degradation reaction	[c] : dkmpp + h2o + o2 --> 2kmb + for + (2) h + pi	0	1	0	1	0	1	0	1	0	1
738	FACOAL161	fatty-acid--CoA ligase (hexadecenoate)	[c] : atp + coa + hdcea <==> amp + hdcoa + ppi	0	1	0	1	0	1	0	1	0	1
739	ACOAO7p	acyl-CoA oxidase (hexadecanoyl-CoA), peroxisomal	[x] : o2 + pmtcoa --> h2o2 + hdd2coa	0.217438	1	0.258834	1	0.223643	1	0.272412	1	0.305285	1
740	ACACT8p	acetyl-CoA acyltransferase (hexadecanoyl-CoA), peroxisomal	[x] : 3ohodcoa + coa --> accoa + pmtcoa	0	1	0	1	0	1	0	1	0	1
741	ACACT7p	acetyl-CoA acyltransferase (tetradecanoyl-CoA), peroxisomal	[x] : 3ohdcoa + coa --> accoa + tdcoa	0	1	0	1	0	1	0	1	0	1
742	ACACT6p	acetyl-CoA C-acetyltransferase (dodecanoyl), peroxisomal	[x] : 3otdcoa + coa --> accoa + ddcacoa	0	1	0	1	0	1	0	1	0	1
743	ACACT5p	acetyl-CoA C-acyltransferase (decanoyl-CoA), peroxisomal	[x] : 3oddcoa + coa --> accoa + dcacoa	0	1	0	1	0	1	0	1	0	1
744	ACACT4p	acetyl-CoA C-acetyltransferase (octanoyl-CoA), peroxisomal	[x] : 3odcoa + coa --> accoa + occoa	0	1	0	1	0	1	0	1	0	1
745	SERPT	serine C-palmitoyltransferase	[c] : h + pmtcoa + ser-L --> 3dsphgn + co2 + coa	0	1	0	1	0	1	0	1	0	1
746	3DSPHR	3-Dehydrosphinganine reductase	[c] : 3dsphgn + h + nadph --> nadp + sphgn	0	1	0	1	0	1	0	1	0	1
747	FAS100COA	fatty acyl-CoA synthase (n-C10:0CoA)	[c] : (3) h + malcoa + (2) nadph + occoa --> co2 + coa + dcacoa + h2o + (2) nadp	0	1	0	1	0	1	0	1	0	1
748	FAS80COA_L	fatty acyl-CoA synthase (n-C8:0CoA), lumped reaction	[c] : accoa + (9) h + (3) malcoa + (6) nadph --> (3) co2 + (3) coa + (3) h2o + (6) nadp + occoa	0	1	0	1	0	1	0	1	0	1
749	FAS120COA	fatty-acyl-CoA synthase (n-C12:0CoA)	[c] : dcacoa + (3) h + malcoa + (2) nadph --> co2 + coa + ddcacoa + h2o + (2) nadp	0	1	0	1	0	1	0	1	0	1
750	FAS140COA	fatty-acyl-CoA synthase (n-C14:0CoA)	[c] : ddcacoa + (3) h + malcoa + (2) nadph --> co2 + coa + h2o + (2) nadp + tdcoa	0	1	0	1	0	1	0	1	0	1
751	FAS160COA	fatty-acyl-CoA synthase (n-C16:0CoA)	[c] : (3) h + malcoa + (2) nadph + tdcoa --> co2 + coa + h2o + (2) nadp + pmtcoa	0	1	0	1	0	1	0	1	0	1
752	FAS180COA	fatty-acyl-CoA synthase (n-C18:0CoA)	[c] : (3) h + malcoa + (2) nadph + pmtcoa --> co2 + coa + h2o + (2) nadp + stcoa	0	1	0	1	0	1	0	1	0	1
753	GCALDD	Glycolaldehyde dehydrogenase	[c] : gcald + h2o + nad --> glyclt + (2) h + nadh	0	1	0	1	0	1	0	1	0	1
754	SQLEr	Squalene epoxidase, endoplasmic reticular (NADP)	[r] : h + nadph + o2 + sql --> Ssq23epx + h2o + nadp	0	1	0	1	0	1	0	1	0	1
755	GLYC3Ptm	glycerol-3-phosphate shuttle	glyc3p[c] --> glyc3p[m]	0	1	0	1	0	1	0	1	0	1
756	HMGCOAtm	Hydroxymethylglutaryl-CoA reversible mitochondrial transport	hmgcoa[c] <==> hmgcoa[m]	-0.235023	0.379899	-0.287869	0.297057	-0.204273	0.192351	-0.0948957	0.974857	-0.055527	0.627228
757	DRBK	Deoxyribokinase	[c] : atp + drib --> 2dr5p + adp + h	0	1	0	1	0	1	0	1	0	1
758	SBTD_D2	D-sorbitol dehydrogenase (D-fructose producing)	[c] : nad + sbt-D --> fru + h + nadh	0.878358	0.560881	3.89965	0.612059	7.50689	0.80303	11.7599	0.371843	17.099	0.623535
759	ARABR	arabinose reductase	[c] : arab-L + h + nadph --> abt + nadp	0	1	0	1	0	1	0	1	0	1
760	ACACT9p	acetyl-CoA acyltransferase (tetracosanoyl-CoA), peroxisomal	[x] : 3ohxccoa + coa --> accoa + ttccoa	0	1	0	1	0	1	0	1	0	1
761	ACt2m	acetate mitochondrial transport via proton symport	ac[c] + h[c] <==> ac[m] + h[m]	0	1	0	1	0	1	0	1	0	1
762	H2Otp	H2O transport, peroxisomal	h2o[c] <==> h2o[x]	-0.0325337	1	-0.0999342	1	-0.134681	1	-0.136545	1	-0.140155	1
763	CO2tp	CO2 peroxisomal transport	co2[c] <==> co2[x]	0	1	0	1	0	1	0	1	0	1
764	CO2tg	CO2 Golgi transport	co2[c] <==> co2[g]	0	1	0	1	0	1	0	1	0	1
765	O2ter	O2 transport, endoplasmic reticulum	o2[c] <==> o2[r]	0.02006	1	0.0525178	1	0.0812834	1	0.087396	1	0.06975	1
766	H2Oter	H2O endoplasmic reticulum transport	h2o[c] <==> h2o[r]	-0.04012	1	-0.104929	1	-0.161348	1	-0.171848	1	-0.135704	1
767	CITL	Citrate lyase	[c] : cit --> ac + oaa	0.00572642	1	0.0132873	1	0.199122	0.958131	0.577987	0.634427	0.668068	0.247774
768	GMAND	GDP-D-mannose dehydratase	[c] : gdpmann --> gdpddman + h2o	0	1	0	1	0	1	0	1	0	1
769	MMCD	Methylmalonyl-CoA decarboxylase	[c] : h + mmcoa-S --> co2 + ppcoa	0	1	0	1	0	1	0	1	0	1
770	CO2ter	CO2 endoplasmic reticular transport via diffusion	co2[c] <==> co2[r]	0	1	0	1	0	1	0	1	0	1
771	MCITS	2-methylcitrate synthase	[c] : h2o + oaa + ppcoa --> 2mcit + coa + h	0	1	0	1	7.09485e-05	1	0.000361154	1	0.000579174	1
772	G6Pter	glucose 6-phosphate endoplasmic reticular transport via diffusion	g6p[c] <==> g6p[r]	0	1	0	1	0	1	0	1	0	1
773	AHCYStn	S-adenosyl-L-homocysteine nuclear transport	ahcys[c] <==> ahcys[n]	0	1	0	1	0	1	0	1	0	1
774	AMETtn	S-adenosyl-L-methionine nuclear transport	amet[c] <==> amet[n]	0	1	0	1	0	1	0	1	0	1
775	DUMPtn	dUMP nuclear transport	dump[c] <==> dump[n]	0	1	0	1	0	1	0	1	0	1
776	PYRt2p	pyruvate peroxisomal transport via proton symport	h[c] + pyr[c] <==> h[x] + pyr[x]	0	1	0	1	0	1	0	1	-0.0245725	1
777	NH4tp	ammonia peroxisomal transport	nh4[c] <==> nh4[x]	0	1	0	1	0	1	0	1	-0.0245725	1
778	GCCcm	glycine-cleavage complex (lipoylprotein), mitochondrial	[m] : dhlpro + nad <==> h + lpro + nadh	6.21207	0.132433	11.525	0.564081	14.4358	0.262161	13.0417	0.794042	10.5454	0.777171
779	GCC2cm	glycine-cleavage complex (lipoamide), mitochondrial	[m] : dhlam + nad <==> h + lpam + nadh	5.76754	0.540295	10.9548	0.841323	13.8699	0.991352	12.0369	0.971822	8.92118	0.863516
780	UDPGD	UDPglucose 6-dehydrogenase	[c] : h2o + (2) nad + udpg --> (3) h + (2) nadh + udpglcur	0	1	0	1	0	1	0	1	0	1
781	PGLYCP	Phosphoglycolate phosphatase	[c] : 2pglyc + h2o --> glyclt + pi	0	1	0	1	0	1	0	1	0	1
782	GLYCLTDy	Glycolate dehydrogenase (NADP)	[c] : glx + h + nadph --> glyclt + nadp	0.0195285	1	0.0410071	1	0.0331977	1	0.0358138	1	0	1
783	HPYRRy	Hydroxypyruvate reductase (NADPH)	[c] : h + hpyr + nadph --> glyc-R + nadp	0	1	0	1	0	1	0	1	0	1
784	TDPGDH	dTDPglucose 4,6-dehydratase	[c] : dtdpglu --> dtdp4d6dg + h2o	0	1	0	1	0	1	0	1	0	1
785	G1PTT	glucose-1-phosphate thymidylyltransferase	[c] : dttp + g1p + h --> dtdpglu + ppi	0	1	0	1	0	1	0	1	0	1
786	TDPDRE	dTDP-4-dehydrorhamnose 3,5-epimerase	[c] : dtdp4d6dg --> dtdp4d6dm	0	1	0	1	0	1	0	1	0	1
787	TDPDRR	dTDP-4-dehydrorhamnose reductase	[c] : dtdp4d6dm + h + nadph --> dtdprmn + nadp	0	1	0	1	0	1	0	1	0	1
788	GPDDA1	Glycerophosphodiester phosphodiesterase (Glycerophosphocholine)	[c] : g3pc + h2o --> chol + glyc3p + h	0	1	0	1	0	1	0	1	0	1
789	MAN1PT2	mannose-1-phosphate guanylyltransferase (GDP)	[c] : gdp + h + man1p --> gdpmann + pi	0	1	0	1	0	1	0	1	0	1
790	ADNCYC	adenylate cyclase	[c] : atp --> camp + ppi	0	1	0	1	0	1	0	1	0	1
791	MI1PP	myo-inositol 1-phosphatase	[c] : h2o + mi1p-D --> inost + pi	0	1	0	1	0	1	0	1	0	1
792	PDE1	3',5'-cyclic-nucleotide phosphodiesterase	[c] : camp + h2o --> amp + h	0	1	0	1	0	1	0	1	0	1
793	MI1PS	myo-Inositol-1-phosphate synthase	[c] : g6p --> mi1p-D	0	1	0	1	0	1	0	1	0	1
794	ACCOAL	acetate-CoA ligase (ADP-forming)	[c] : atp + coa + ppa --> adp + pi + ppcoa	0	1	0	1	0	1	0	1	0	1
795	AMCOXO	2-aminomuconate reductase	[c] : amuco + h + h2o + nadph --> 2oxoadp + nadp + nh4	0	1	0	1	0	1	0	1	0	1
796	PDE4	3',5'-cyclic-nucleotide phosphodiesterase	[c] : 35cgmp + h2o --> gmp + h	0	1	0	1	0	1	0	1	0	1
797	HKYNH	3-Hydroxy-L-kynurenine hydrolase	[c] : h2o + hLkynr --> 3hanthrn + ala-L	0	1	0	1	0	1	0	1	0	1
798	3HAO	3-hydroxyanthranilate 3,4-dioxygenase	[c] : 3hanthrn + o2 --> cmusa + h	0	1	0	1	0	1	0	1	0	1
799	MACACI	maleylacetoacetate isomerase	[c] : 4mlacac --> 4fumacac	0	1	0	1	8.58307e-05	1	0.000790107	1	0	1
800	FUMAC	fumarylacetoacetase	[c] : 4fumacac + h2o --> acac + fum + h	0	1	0	1	8.58307e-05	1	0.000790107	1	0	1
801	HGNTOR	Homogentisate:oxygen 1,2-oxidoreductase (decyclizing)	[c] : hgentis + o2 --> 4mlacac + h	0	1	0	1	8.58307e-05	1	0.000790107	1	0	1
802	BETALDHx	betaine-aldehyde dehydrogenase	[c] : betald + h2o + nad --> glyb + (2) h + nadh	0	1	0	1	0	1	0	1	0	1
803	KYN	kynureninase	[c] : Lkynr + h2o --> ala-L + anth + h	0	1	0	1	0	1	0	1	0	1
804	FKYNH	N-Formyl-L-kynurenine amidohydrolase	[c] : Lfmkynr + h2o --> Lkynr + for + h	0	1	0	1	0	1	0	1	0	1
805	FALDH	formaldehyde dehydrogenase	[c] : fald + gthrd + nad <==> Sfglutth + h + nadh	-8.36535	0.994916	-15.759	0.799977	-20.0628	0.999967	-18.3337	0.718906	-15.1816	0.979567
806	SFGTH	S-Formylglutathione hydralase	[c] : Sfglutth + h2o <==> for + gthrd + h	-8.36535	0.994916	-15.759	0.799977	-20.0628	0.999967	-18.3337	0.718906	-15.1816	0.979567
807	CHLPCTD	choline phosphate cytididyltransferase	[c] : cholp + ctp + h --> cdpchol + ppi	0	1	0	1	0	1	0	1	0	1
808	CHOLK	Choline kinase	[c] : atp + chol --> adp + cholp + h	0	1	0	1	0	1	0	1	0	1
809	ETHAK	Ethanolamine kinase	[c] : atp + etha --> adp + ethamp + h	0	1	0	1	0	1	0	1	0	1
810	PETHCT	phosphoethanolamine cytidyltransferase	[c] : ctp + ethamp + h --> cdpea + ppi	0	1	0	1	0	1	0	1	0	1
811	34HPPOR	4-Hydroxyphenylpyruvate:oxygen oxidoreductase	[c] : 34hpp + o2 --> co2 + hgentis	0	1	0	1	8.58307e-05	1	0.000790107	1	0	1
812	ALDD20x	aldehyde dehydrogenase (indole-3-acetaldehyde, NAD)	[c] : h2o + id3acald + nad --> (2) h + ind3ac + nadh	0	1	0	1	0	1	0	1	0	1
813	ALDD20xm	aldehyde dehydrogenase (indole-3-acetaldehyde, NAD), mitochondrial	[m] : h2o + id3acald + nad --> (2) h + ind3ac + nadh	0	1	0	1	0	1	0	1	0	1
814	SLCBK1	sphingolipid long chain base kinase (sphinganine)	[c] : atp + sphgn --> adp + h + sph1p	0	1	0	1	0	1	0	1	0	1
815	MLTG1	Maltodextrin glucosidase (maltotriose)	[c] : h2o + malttr --> glc-D + malt	0	1	0	1	0	1	0	1	0	1
816	SPODM	superoxide dismutase	[c] : (2) h + (2) o2s --> h2o2 + o2	0.000225875	1	0.000162627	1	0.000384403	1	0.00024923	0.99922	0.000333014	1
817	PEAMNO	Phenethylamine oxidase	[c] : h2o + o2 + peamn --> h2o2 + nh4 + pacald	0	1	0	1	0	1	0	1	0	1
818	ALDD19x	aldehyde dehydrogenase (phenylacetaldehyde, NAD)	[c] : h2o + nad + pacald --> (2) h + nadh + pac	0	1	0	1	0	1	0	1	0	1
819	PACCOAL	phenylacetate-CoA ligase	[c] : atp + coa + pac --> amp + phaccoa + ppi	0	1	0	1	0	1	0	1	0	1
820	FBA2	D-Fructose 1-phosphate D-glyceraldehyde-3-phosphate-lyase	[c] : f1p <==> dhap + glyald	0.556568	0.725386	2.43355	0.873404	4.70279	0.898527	7.39732	0.975936	10.0268	1
821	SELNPS	Selenophosphate synthase	[c] : atp + h2o + seln --> amp + pi + selnp	0	1	0	1	0	1	0	1	0	1
822	AMANK	N-acetyl-D-mannosamine kinase	[c] : acmana + atp --> acmanap + adp + h	0	1	0	1	0	1	0	1	0	1
823	ATPtm	ADP/ATP transporter, mitochondrial	adp[c] + atp[m] --> adp[m] + atp[c]	1.90977	0.965826	0.999381	0.707083	1.05801	0.876347	1.11574	0.24163	0.857212	0.955036
824	CRNCARtp	carnitine-acetylcarnitine carrier, peroxisomal	acrn[x] + crn[c] --> acrn[c] + crn[x]	0.235023	0.379899	0.287869	0.297057	0.204273	0.192351	0.0948957	0.974857	0.055527	0.627228
825	ORNt3m	ornithine mitochondrial transport via proton antiport	h[c] + orn[m] <==> h[m] + orn[c]	0.0222469	0.981347	0.0283919	0.998919	0.0313314	0.999851	0.0327303	1	0.0327905	0.982852
826	CATp	catalase A, peroxisomal	[x] : (2) h2o2 --> (2) h2o + o2	0.0162668	1	0.0499671	1	0.0673405	1	0.0682725	1	0.0823636	1
827	ITCOALm	Itaconate--CoA ligase (ADP-forming), mitochondrial	[m] : atp + coa + itacon <==> adp + itaccoa + pi	0	1	0	1	0	1	-0.000360856	1	0	1
828	ICDHy	isocitrate dehydrogenase (NADP)	[c] : icit + nadp --> akg + co2 + nadph	6.1309	0.804097	7.24909	0.765172	6.61826	0.996175	4.32668	1	3.34317	0.999932
829	DPGM	Diphosphoglyceromutase	[c] : 13dpg <==> 23dpg + h	0	1	0	1	0	1	0	1	0	1
830	PEPCK	Phosphoenolpyruvate carboxykinase (GTP)	[c] : gtp + oaa --> co2 + gdp + pep	0	1	0	1	0.000154455	1	0.00158045	1	0.000966103	1
831	ACACT1rm	acetyl-CoA C-acetyltransferase, mitochondrial	[m] : (2) accoa <==> aacoa + coa	7.48726	0.0182198	4.67584	0.0145811	1.78727	0.0332603	0.519549	0.964751	0.171871	0.975458
832	ACOATA	Acetyl-CoA ACP transacylase	[c] : ACP + accoa <==> acACP + coa	0	1	0	1	0	1	0	1	0	1
833	FA120ACPH	fatty-acyl-ACP hydrolase	[c] : ddcaACP + h2o <==> ACP + ddca + h	0	1	0	1	0	1	0	1	0	1
834	FA140ACPH	fatty-acyl-ACP hydrolase	[c] : h2o + myrsACP <==> ACP + h + ttdca	0	1	0	1	0	1	0	1	0	1
835	FA141ACPH	fatty-acyl-ACP hydrolase	[c] : h2o + tdeACP <==> ACP + h + ttdcea	0	1	0	1	0	1	0	1	0	1
836	FA160ACPH	fatty-acyl-ACP hydrolase	[c] : h2o + palmACP <==> ACP + h + hdca	0	1	0	1	0	1	0	1	0	1
837	FA180ACPH	fatty-acyl-ACP hydrolase	[c] : h2o + ocdcaACP <==> ACP + h + ocdca	0	1	0	1	0	1	0	1	0	1
838	FA161ACPH	fatty-acyl-ACP hydrolase	[c] : h2o + hdeACP <==> ACP + h + hdcea	0	1	0	1	0	1	0	1	0	1
839	FA181ACPH	fatty-acyl-ACP hydrolase	[c] : h2o + octeACP <==> ACP + h + ocdcea	0	1	0	1	0	1	0	1	0	1
840	FA182ACPH	fatty-acyl-ACP hydrolase	[c] : h2o + ocdcyaACP <==> ACP + h + ocdcya	0	1	0	1	0	1	0	1	0	1
841	PPPGOm	protoporphyrinogen oxidase, mitochondrial	[m] : (3) o2 + (2) pppg9 --> (6) h2o + (2) ppp9	0	1	0	1	0	1	0	1	0	1
842	MCOATA	Malonyl-CoA-ACP transacylase	[c] : ACP + malcoa <==> coa + malACP	0	1	0	1	0	1	0	1	0	1
843	MCOATAm	Malonyl-CoA-ACP transacylase, mitochondrial	[m] : ACP + malcoa <==> coa + malACP	0	1	0	1	0	1	0	1	0	1
844	TMDPPK	thiamine-diphosphate kinase	[c] : atp + thmpp --> adp + thmtp	0	1	0	1	0	1	0	1	0	1
845	SBTR	D-sorbitol reductase	[c] : glc-D + h + nadph --> nadp + sbt-D	0.878358	0.560881	3.89965	0.612059	7.50689	0.80303	11.7599	0.371843	17.099	0.623535
846	LNS14DM	cytochrome P450 lanosterol 14-alpha-demethylase (NADP)	[c] : (2) h + lanost + (3) nadph + (3) o2 --> 44mctr + for + (4) h2o + (3) nadp	0	1	0	1	0	1	0	1	0	1
847	GUAD	guanine deaminase	[c] : gua + h + h2o --> nh4 + xan	0	1	0	1	0	1	0	1	0	1
848	P5CDm	1-pyrroline-5-carboxylate dehydrogenase, mitochondrial	[m] : 1pyr5c + (2) h2o + nad --> glu-L + h + nadh	0	1	0	1	0	1	0	1	0	1
849	ACGSm	N-acteylglutamate synthase, mitochondrial	[m] : accoa + glu-L --> acglu + coa + h	0	1	0	1	0	1	0	1	0	1
850	ACODA	acetylornithine deacetylase	[c] : acorn + h2o --> ac + orn	0	1	0	1	0	1	0	1	0	1
851	ADA	Adenosine deaminase	[c] : adn + h + h2o --> ins + nh4	0	1	0	1	0	1	0	1	0	1
852	DADA	Deoxyadenosine deaminase	[c] : dad-2 + h + h2o --> din + nh4	0	1	0	1	0	1	0	1	0	1
853	ADSS	adenylosuccinate synthase	[c] : asp-L + gtp + imp --> dcamp + gdp + (2) h + pi	4.7e-05	1	4.7e-05	1	4.7e-05	1	4.7e-05	1	4.7e-05	1
854	AGDC	N-acetylglucosamine-6-phosphate deacetylase	[c] : acgam6p + h2o --> ac + gam6p	0	1	0	1	0	1	0	1	0	1
855	CSND	Cytosine deaminase	[c] : csn + h + h2o --> nh4 + ura	0	1	0	1	0	1	0	1	0	1
856	CYTD	cytidine deaminase	[c] : cytd + h + h2o --> nh4 + uri	0	1	0	1	0	1	0	1	0	1
857	DCYTD	deoxycytidine deaminase	[c] : dcyt + h + h2o --> duri + nh4	0	1	0	1	0	1	0	1	0	1
858	GF6PTA	glutamine-fructose-6-phosphate transaminase	[c] : f6p + gln-L --> gam6p + glu-L	0	1	0	1	0	1	0	1	0	1
859	GLNS	glutamine synthetase	[c] : atp + glu-L + nh4 --> adp + gln-L + h + pi	0.0557923	0.0889643	0.0682366	0.538613	0.0792045	0.290325	0.0860226	1	0.0931535	1
860	GLUCYS	gamma-glutamylcysteine synthetase	[c] : atp + cys-L + glu-L --> adp + glucys + h + pi	0	1	0	1	0	1	0	1	0	1
861	GLUPRT	glutamine phosphoribosyldiphosphate amidotransferase	[c] : gln-L + h2o + prpp --> glu-L + ppi + pram	0.001463	1	0.001463	1	0.001463	1	0.001463	1	0.001463	1
862	GMPR	GMP reductase	[c] : gmp + (2) h + nadph --> imp + nadp + nh4	0	1	0	1	0	1	0	1	0	1
863	GTHS	glutathione synthetase	[c] : atp + glucys + gly --> adp + gthrd + h + pi	0	1	0	1	0	1	0	1	0	1
864	PPBNGS	porphobilinogen synthase	[c] : (2) 5aop --> h + (2) h2o + ppbng	0	1	0	1	0	1	0	1	0	1
865	PRAGSr	phosphoribosylglycinamide synthase	[c] : atp + gly + pram <==> adp + gar + h + pi	0.001463	1	0.001463	1	0.001463	1	0.001463	1	0.001463	1
866	PRFGS	phosphoribosylformylglycinamidine synthase	[c] : atp + fgam + gln-L + h2o --> adp + fpram + glu-L + h + pi	0.001463	1	0.001463	1	0.001463	1	0.001463	1	0.001463	1
867	KYN3OX	kynurenine 3-monooxygenase	[c] : Lkynr + h + nadph + o2 --> h2o + hLkynr + nadp	0	1	0	1	0	1	0	1	0	1
868	PHCDm	L-1-pyrroline-3-hydroxy-5-carboxylate dehydrogenase	[m] : 1p3h5c + (2) h2o + nad --> e4hglu + h + nadh	0	1	0	1	0	1	0	1	0	1
869	P5CR	pyrroline-5-carboxylate reductase	[c] : 1pyr5c + (2) h + nadph --> nadp + pro-L	0.195043	1	0.20233	1	0.196532	1	0.107137	1	0.0389897	1
870	G5SADs	L-glutamate 5-semialdehyde dehydratase (spontaneous)	[c] : glu5sa --> 1pyr5c + h + h2o	0	1	0	1	0	1	0	1	0	1
871	GARFT	phosphoribosylglycinamide formyltransferase	[c] : 10fthf + gar <==> fgam + h + thf	0.001463	1	0.001463	1	0.001463	1	0.001463	1	0.001463	1
872	PRAIS	phosphoribosylaminoimidazole synthase	[c] : atp + fpram --> adp + air + (2) h + pi	0.001463	1	0.001463	1	0.001463	1	0.001463	1	0.001463	1
873	PRASCS	phosphoribosylaminoimidazolesuccinocarboxamide synthase	[c] : 5aizc + asp-L + atp <==> 25aics + adp + h + pi	0.001463	1	0.001463	1	0.001463	1	0.001463	1	0.001463	1
874	PROD2	Proline dehydrogenase	[c] : fad + pro-L --> 1pyr5c + fadh2 + h	0	1	0	1	0	1	0	1	0	1
875	UNK3	2-keto-4-methylthiobutyrate transamination	[c] : 2kmb + glu-L --> akg + met-L	0	1	0	1	0	1	0	1	0	1
876	HPROxm	L-hydroxyproline dehydrogenase (NAD), mitochondrial	[m] : 4hpro-LT + nad --> 1p3h5c + (2) h + nadh	0	1	0	1	0	1	0	1	0	1
877	PHCHGSm	L-1-Pyrroline-3-hydroxy-5-carboxylate spontaneous conversion to L-4-Hydroxyglutamate semialdehyde, mitochondrial	[m] : 1p3h5c + h + h2o <==> 4hglusa	0	1	0	1	0	1	0	1	0	1
878	AMPDA	Adenosine monophosphate deaminase	[c] : amp + h + h2o --> imp + nh4	0	1	0	1	0	1	0	1	0	1
879	DCMPDA	dCMP deaminase	[c] : dcmp + h + h2o <==> dump + nh4	0	1	0	1	0	1	0	1	0	1
880	CTPS1	CTP synthase (NH3)	[c] : atp + nh4 + utp --> adp + ctp + (2) h + pi	0.000781	1	0.000781	1	0.000781	1	0.000781	1	0.000781	1
881	G5SADrm	L-glutamate 5-semialdehyde dehydratase, reversible, mitochondrial	[m] : glu5sa <==> 1pyr5c + h + h2o	0.0251444	0.107625	0.031911	0.570507	0.0356576	0.290325	0.0363067	1	0.0363823	1
882	PRO1x	proline oxidase (L-proline, NAD)	[c] : nad + pro-L --> 1pyr5c + (2) h + nadh	0.195043	1	0.20233	1	0.196532	1	0.107137	1	0.0389897	1
883	PRO1xm	proline oxidase (NAD), mitochondrial	[m] : nad + pro-L --> 1pyr5c + (2) h + nadh	0.497168	1	0.97294	1	1.31877	1	0.688956	0.999858	0.411892	0.999997
884	THMP	thiamin phosphatase	[c] : h2o + thmmp --> pi + thm	0	1	0	1	0	1	0	1	0	1
885	TMDPK	thiamine diphosphokinase	[c] : atp + thm --> amp + h + thmpp	0	1	0	1	0	1	0	1	0	1
886	FTHFCL	5-formethyltetrahydrofolate cyclo-ligase	[c] : 5fthf + atp --> adp + methf + pi	0	1	0	1	0	1	0	1	0	1
887	10FTHFtm	10-Formyltetrahydrofolate mitochondrial transport via diffusion	10fthf[c] <==> 10fthf[m]	-12.2449	0.112452	-22.6082	0.493909	-28.4929	0.309538	-25.3431	0.711708	-19.7079	0.769138
888	GCC2am	glycine-cleavage complex (lipoamide), mitochondrial	[m] : gly + h + lpam <==> alpam + co2	5.76754	0.540295	10.9548	0.841323	13.8699	0.991352	12.0369	0.971822	8.92118	0.863516
889	GCC2bim	glycine-cleavage system (lipoamide) irreversible, mitochondrial	[m] : alpam + thf --> dhlam + mlthf + nh4	5.76754	0.540295	10.9548	0.841323	13.8699	0.991352	12.0369	0.971822	8.92118	0.863516
890	GCCam	glycine-cleavage complex (lipoylprotein), mitochondrial	[m] : gly + h + lpro <==> alpro + co2	6.21207	0.132433	11.525	0.564081	14.4358	0.262161	13.0417	0.794042	10.5454	0.777171
891	GCCbim	glycine-cleavage complex (lipoylprotein) irreversible, mitochondrial	[m] : alpro + thf --> dhlpro + mlthf + nh4	6.21207	0.132433	11.525	0.564081	14.4358	0.262161	13.0417	0.794042	10.5454	0.777171
892	VALTAm	valine transaminase, mitochondiral	[m] : akg + val-L <==> 3mob + glu-L	-2.54095	0.999999	-5.59777	0.999597	-7.22816	0.999746	-6.41229	0.342126	-4.83751	0.364678
893	FTHFLm	formate-tetrahydrofolate ligase, mitochondrial	[m] : atp + for + thf <==> 10fthf + adp + pi	0.253654	1	0.113545	1	0.170613	0.831636	0.24769	0.993237	0.224459	0.999998
894	FTHFL	formate-tetrahydrofolate ligase	[c] : atp + for + thf <==> 10fthf + adp + pi	-24.8579	0.102825	-45.9002	0.669163	-58.4963	0.393993	-54.5704	0.679869	-45.6709	0.652268
895	CSNATr	carnitine O-acetyltransferase	[c] : accoa + crn <==> acrn + coa	-0.235023	0.379899	-0.287869	0.297057	-0.204273	0.192351	-0.0948957	0.974857	-0.055527	0.627228
896	CSNATp	carnitine O-acetyltransferase, reverse direction, peroxisomal	[x] : accoa + crn <==> acrn + coa	0.235023	0.379899	0.287869	0.297057	0.204273	0.192351	0.0948957	0.974857	0.055527	0.627228
897	AKGDm	2-oxoglutarate dehydrogenase	[m] : akg + coa + nad --> co2 + nadh + succoa	0.813785	0.294197	0.872211	0.736107	0.915257	0.581653	1.03642	0.945302	0.914558	0.256203
898	COAtm	CoA transporter	coa[c] <==> coa[m]	0.235023	0.379899	0.287869	0.297057	0.204273	0.192351	0.0948957	0.974857	0.055527	0.627228
899	C160CPT1	carnitine O-palmitoyltransferase	[c] : crn + pmtcoa --> coa + pmtcrn	0	1	0	1	0	1	0	1	0	1
900	C180CPT1	carnitine O-stearoyl transferase	[c] : crn + stcoa --> coa + stcrn	0	1	0	1	0	1	0	1	0	1
901	C160CPT2	C160 transport into the mitochondria	[m] : coa + pmtcrn --> crn + pmtcoa	0	1	0	1	0	1	0	1	0	1
902	C181CPT1	carnitine octadecenoyl transferase	[c] : crn + odecoa --> coa + odecrn	0	1	0	1	0	1	0	1	0	1
903	C180CPT2	carnitine O-stearoyl transferase	[m] : coa + stcrn --> crn + stcoa	0	1	0	1	0	1	0	1	0	1
904	C181CRNt	C181 transport into the mitochondria	odecrn[c] --> odecrn[m]	0	1	0	1	0	1	0	1	0	1
905	C180CRNt	C180 transport into the mitochondria	stcrn[c] --> stcrn[m]	0	1	0	1	0	1	0	1	0	1
906	C160CRNt	C160 transport into the mitochondria	pmtcrn[c] --> pmtcrn[m]	0	1	0	1	0	1	0	1	0	1
907	C181CPT2	carnitine octadecenoyl transferase	[m] : coa + odecrn --> crn + odecoa	0	1	0	1	0	1	0	1	0	1
908	C204CPT1	carnitine C20:4 transferase	[c] : arachdcoa + crn --> arachdcrn + coa	0	1	0	1	0	1	0	1	0	1
909	C204CRNt	arachidonic acid transport into the mitochondria	arachdcrn[c] --> arachdcrn[m]	0	1	0	1	0	1	0	1	0	1
910	C204CPT2	arachidonic acid transport into the mitochondria	[m] : arachdcrn + coa --> arachdcoa + crn	0	1	0	1	0	1	0	1	0	1
911	C226CPT1	carnitine C22:6 transferase	[c] : c226coa + crn --> c226crn + coa	0	1	0	1	0	1	0	1	0	1
912	C226CRNt	C226 transport into the mitochondria	c226crn[c] --> c226crn[m]	0	1	0	1	0	1	0	1	0	1
913	C226CPT2	C226 transport into the mitochondria	[m] : c226crn + coa --> c226coa + crn	0	1	0	1	0	1	0	1	0	1
914	FAOXC160	Beta oxidation of long chain fatty acid	[m] : (7) coa + (7) fad + (7) h2o + (7) nad + pmtcoa --> (8) accoa + (7) fadh2 + (7) h + (7) nadh	0	1	0	1	0	1	0	1	0	1
915	FAOXC180	Beta oxidation of long chain fatty acid	[m] : coa + fad + h2o + nad + stcoa --> accoa + fadh2 + h + nadh + pmtcoa	0	1	0	1	0	1	0	1	0	1
916	FAOXC204	Beta oxidation of long chain fatty acid	[m] : arachdcoa + (9) coa + (5) fad + (9) h2o + (9) nad --> (10) accoa + (5) fadh2 + (9) h + (9) nadh	0	1	0	1	0	1	0	1	0	1
917	FAOXC226	Beta oxidation of long chain fatty acid	[m] : c226coa + (10) coa + (4) fad + (10) h2o + (10) nad --> (11) accoa + (4) fadh2 + (10) h + (10) nadh	0	1	0	1	0	1	0	1	0	1
918	NADH2-u10m	NADH dehydrogenase, mitochondrial	(5) h[m] + nadh[m] + q10[m] --> (4) h[c] + nad[m] + q10h2[m]	3.51232	0.97143	2.31525	0.999693	2.15616	0.37615	1.86043	0.569649	1.37353	0.970165
919	AKGMALtm	alpha-ketoglutarate/malate transporter	akg[m] + mal-L[c] <==> akg[c] + mal-L[m]	-12.7512	0.157327	-15.4826	0.384138	-16.2106	0.830023	-13.9934	0.746608	-11.1768	0.999989
920	FACOAL160i	C160 fatty acid activation	[c] : atp + coa + hdca --> amp + pmtcoa + ppi	0	1	0	1	0	1	0	1	0	1
921	FACOAL180i	C180 fatty acid activation	[c] : atp + coa + ocdca --> amp + ppi + stcoa	0	1	0	1	0	1	0	1	0	1
922	FACOAL181i	C181 fatty acid activation	[c] : atp + coa + ocdcea --> amp + odecoa + ppi	0	1	0	1	0	1	0	1	0	1
923	FACOAL204i	arachidonic acid activation	[c] : arachd + atp + coa --> amp + arachdcoa + ppi	0	1	0	1	0	1	0	1	0	1
924	FACOAL226i	C226 fatty acid activation	[c] : atp + coa + crvnc --> amp + c226coa + ppi	0	1	0	1	0	1	0	1	0	1
925	CATm	catalase	[m] : (2) h2o2 --> (2) h2o + o2	0.355863	0.404364	0.306543	0.41846	0.273754	0.901209	0.152584	0.823791	0.140018	0.780098
926	LDH_Lm	L-lactate dehydrogenase	[m] : lac-L + nad <==> h + nadh + pyr	2.14396	0.900563	-1.25409	0.93321	-5.79601	0.973309	-7.85698	0.818465	-7.16388	0.933149
927	H2CO3Dm	carboxylic acid dissociation	[m] : co2 + h2o <==> h2co3	2.23237	0.31283	1.40849	0.360721	0.533431	0.734019	0.146149	1	0.0571857	0.998283
928	PEPCKm	Phosphoenolpyruvate carboxykinase (GTP)	[m] : gtp + oaa --> co2 + gdp + pep	8.06949	0.0244094	5.26433	0.0985032	2.50475	0.330992	1.45971	0.987072	1.032	0.97529
929	GLYKm	glycerol kinase	[m] : atp + glyc --> adp + glyc3p + h	0	1	0	1	0	1	0	1	0	1
930	HMGLm	hydroxymethylglutaryl-CoA lyase	[m] : hmgcoa --> acac + accoa	0	1	0	1	0	1	0	1	0	1
931	PPCOACm	Propionyl-CoA carboxylase, mitochondrial	[m] : atp + hco3 + ppcoa --> adp + h + mmcoa-S + pi	0	1	0	1	0	1	0	1	0	1
932	MMSAD1m	methylmalonate-semialdehyde dehydrogenase	[m] : 2mop + coa + nad --> co2 + nadh + ppcoa	0	1	0	1	0	1	0	1	0	1
933	CK	ATP Creatine kinase	[m] : atp + creat <==> adp + pcreat	0.205139	1	0.117544	1	0.146444	1	0.170201	1	0.0974166	1
934	TMDK1m	thymidine kinase (ATP:thymidine)	[m] : atp + thymd --> adp + dtmp + h	0	1	0	1	0	1	0	1	0	1
935	CYOR-u10m	ubiquinol-6 cytochrome c reductase, Complex III	(2) ficytC[m] + (2) h[m] + q10h2[m] --> (2) focytC[m] + (4) h[c] + q10[m]	4.82636	0.944205	3.8365	0.845698	3.22132	0.778178	2.11423	0.243538	1.39745	0.826282
936	ATPS4m	ATP synthase (four protons for one ATP)	adp[m] + (4) h[c] + pi[m] --> atp[m] + (3) h[m] + h2o[m]	10.3242	0.265119	6.34746	0.254697	3.51263	0.250442	2.30796	0.983644	1.63252	0.986036
937	DGNSKm	deoxyguanosine kinase	[m] : atp + dgsn --> adp + dgmp + h	0	1	0	1	0	1	0	1	0	1
938	DUTPDPm	dUTP diphosphatase	[m] : dutp + h2o --> dump + h + ppi	0	1	0	1	0	1	0	1	0	1
939	GTHRDt	Glutathione transport into mitochondria	atp[c] + gthrd[c] + h2o[c] <==> adp[c] + gthrd[m] + h[c] + pi[c]	0	1	0	1	0	1	0	1	0	1
940	GTHOm	glutathione oxidoreductase	[m] : gthox + h + nadph --> (2) gthrd + nadp	4.30875	0.408052	5.69805	0.898183	4.89909	0.542476	3.34496	0.999698	2.19627	0.977497
941	GTHPm	glutathione peroxidase, mitochondria	[m] : (2) gthrd + h2o2 <==> gthox + (2) h2o	4.30875	0.408052	5.69805	0.898183	4.89909	0.542476	3.34496	0.999698	2.19627	0.977497
942	SPODMm	superoxide dismutase	[m] : (2) h + (2) o2s --> h2o2 + o2	0.0352726	0.356631	0.0269655	0.364302	0.018735	0.463311	0.00995033	0.197292	0.00652504	0.97874
943	CYOOm3	cytochrome c oxidase, mitochondrial Complex IV	(4) focytC[m] + (7.92) h[m] + o2[m] --> (4) ficytC[m] + (4) h[c] + (1.96) h2o[m] + (0.02) o2s[m]	4.14502	0.425242	3.08792	0.264847	2.21816	0.501723	1.26855	0.157814	0.873972	0.968709
944	OCOAT1m	3-oxoacid CoA-transferase	[m] : acac + succoa <==> aacoa + succ	-7.25224	0.0193661	-4.38798	0.0154971	-1.58486	0.0639479	-0.42857	0.999991	-0.121436	0.60568
945	OCBTm	ornithine carbamoyltransferase, irreversible	[m] : cbp + orn --> citr-L + h + pi	0.0803336	0.107625	0.101952	0.570507	0.113923	0.290325	0.115996	1	0.116238	1
946	THYMDtm	thymd transport	thymd[c] <==> thymd[m]	0	1	0	1	0	1	0	1	0	1
947	GLYCtm	glycerol transport	glyc[c] <==> glyc[m]	0	1	0	1	0	1	0	1	0	1
948	FE2tm	iron (II) transport	fe2[c] + h[c] --> fe2[m] + h[m]	0	1	0	1	0	1	0	1	0	1
949	GLYtm	glycine passive transport to mitochondria	gly[c] <==> gly[m]	11.968	0.129413	22.4651	0.523536	28.2893	0.193194	25.0619	0.744647	19.4498	0.783278
950	PCm	pyruvate carboxylase	[m] : atp + hco3 + pyr --> adp + h + oaa + pi	7.68952	0.0244094	4.77923	0.103305	1.7603	0.0748	0.396994	1	0.0767577	1
951	ORNt4m	ornithine mitochondrial transport exchange with citruline	citr-L[c] + h[c] + orn[m] <==> citr-L[m] + h[m] + orn[c]	-0.0222469	0.981347	-0.0283919	0.998919	-0.0313314	0.999851	-0.0327303	1	-0.0327905	0.982852
952	CITRtm	citrulline mitochondrial transport via proton antiport	citr-L[m] <==> citr-L[c]	0.0580867	0.608076	0.0735604	0.760798	0.0825912	0.193701	0.0832661	0.999999	0.0834477	0.992567
953	ARGtm	arginine mitochondrial transport via ornithine carrier	arg-L[c] + h[m] <==> arg-L[m] + h[c]	0	1	0	1	0	1	0	1	0	1
954	LYStm	Lysine mitochondrial transport via ornithine carrier	h[m] + lys-L[c] <==> h[c] + lys-L[m]	0	1	0	1	0.0018606	1	0.00391668	1	0.00509265	1
955	ASPGLUm	aspartate-glutamate mitochondrial shuttle	asp-L[m] + glu-L[c] + h[c] <==> asp-L[c] + glu-L[m] + h[m]	-2.19884	0.472766	-2.18353	0.793385	-2.33924	0.945261	-1.8069	0.483171	-1.2523	0.996866
956	SUCCt2m	succinate transport, mitochondrial	pi[m] + succ[c] <==> pi[c] + succ[m]	0	1	-0.00492433	1	-0.108409	1	-0.322494	0.895233	-0.42612	0.999288
957	THD1m	NAD(P) transhydrogenase	h[c] + nadh[m] + nadp[m] <==> h[m] + nad[m] + nadph[m]	2.57952	0.985159	5.08716	0.999294	7.63551	0.999912	5.35932	0.218938	4.22985	0.249136
958	Htm	Uncoupling protein	h[c] --> h[m]	5.6097	0.999997	6.76184	0.999997	10.8541	0.999869	9.19958	1	5.74378	0.997083
959	BDHm	(R)-3-Hydroxybutanoate:NAD+ oxidoreductase	[m] : bhb + nad <==> acac + h + nadh	-5.89667	0.0166188	-3.66134	0.138578	-1.39529	0.354083	-0.467976	0.997469	-0.186808	0.999874
960	BHBtm	(R)-3-Hydroxybutanoate mitochondrial transport via H+ symport	bhb[c] + h[c] <==> bhb[m] + h[m]	-5.89667	0.0166188	-3.66134	0.138578	-1.39529	0.354083	-0.467976	0.997469	-0.186808	0.999874
961	ACACt2m	Acetoacetate mitochondrial transport via H+ symport	acac[c] + h[c] <==> acac[m] + h[m]	-0.850285	0.659166	-0.390808	0.635655	-0.0551935	0.551899	0.0572107	0.976638	0.0732292	0.179532
962	ACALDtm	acetaldehyde mitochondrial diffusion	acald[m] <==> acald[c]	0	1	0	1	0	1	0	1	0	1
963	SBPP1er	sphingoid base-phosphate phosphatase (sphinganine 1-phosphatase), endoplasmic reticulum	[r] : h2o + sph1p --> pi + sphgn	0	1	0	1	0	1	0	1	0	1
964	BILIRED	Nad(p)h biliverdin reductase	[c] : biliverd + h + nadph --> bilirub + nadp	0	1	0	1	0	1	0	1	0	1
965	GFUCS	GDP-L-fucose synthase	[c] : gdpddman + h + nadph --> gdpfuc + nadp	0	1	0	1	0	1	0	1	0	1
966	BACCL	biotin-[acetyl-CoA-carboxylase] ligase	[c] : atp + btn + h --> btamp + ppi	0	1	0	1	0	1	0	1	0	1
967	CYSO	cysteine oxidase	[c] : cys-L + o2 --> 3sala + (2) h	0	1	0	1	0	1	0	1	0	1
968	G6PPer	glucose-6-phosphate phosphatase, edoplasmic reticular	[r] : g6p + h2o --> glc-D + pi	0	1	0	1	0	1	0	1	0	1
969	FT	farnesyltranstransferase (trans,trans,cis-geranylgeranyl diphosphate-generating)	[c] : frdp + ipdp --> ppi + ttc-ggdp	0	1	0	1	0	1	0	1	0	1
970	GLYCK2	glycerate kinase	[c] : atp + glyc-R --> 2pg + adp + h	0	1	0	1	0	1	0	1	0	1
971	NNATr	nicotinate-nucleotide adenylyltransferase	[c] : atp + h + nicrnt <==> dnad + ppi	0	1	0	1	0	1	-0.000166707	1	0	1
972	ITCOAL1m	Itaconate--CoA ligase (GDP-forming), mitochondrial	[m] : coa + gtp + itacon <==> gdp + itaccoa + pi	0	1	0	1	0	1	0.000360856	1	0	1
973	H2CO3D2	carboxylic acid dissociation	[c] : h + hco3 <==> h2co3	-9.63585	0.685936	-10.7191	0.68097	-10.6028	0.896166	-9.47626	0.738352	-7.53756	0.667639
974	KAS8	b-ketoacyl synthetase (palmitate, n-C16:0)	[c] : accoa + (20) h + (7) malcoa + (14) nadph --> (7) co2 + (8) coa + (6) h2o + hdca + (14) nadp	0	1	0	1	0	1	0	1	0	1
975	HMGCOASi	Hydroxymethylglutaryl CoA synthase (ir)	[c] : aacoa + accoa + h2o --> coa + h + hmgcoa	0	1	0	1	0	1	0	1	0	1
976	ADKd	adenylate kinase (d form)	[c] : damp + datp <==> (2) dadp	0	1	0	1	0	1	0	1	0	1
977	ALKP	alkaline phosphatase	[c] : dhap + h2o --> dha + pi	0	1	0	1	0	1	0	1	0	1
978	MTAP	5'-methylthioadenosine phosphorylase	[c] : 5mta + pi --> 5mdr1p + ade	0	1	0	1	0	1	0	1	0	1
979	ACYP	acylphosphatase	[c] : 13dpg + h2o --> 3pg + h + pi	0	1	0	1	0	1	0	1	0	1
980	P5CRx	pyrroline-5-carboxylate reductase	[c] : 1pyr5c + (2) h + nadh --> nad + pro-L	0	1	0	1	0	1	0	1	0	1
981	DOLK_L	Dolichol kinase, human (liver)	[c] : ctp + (0.1) dolichol_L --> cdp + (0.1) dolp_L + h	0	1	0	1	0	1	0	1	0	1
982	DOLICHOL_Lter	dolichol diffusion, human (liver)	(0.1) dolichol_L[r] <==> (0.1) dolichol_L[c]	0	1	0	1	0	1	0	1	0	1
983	DOLICHOL_Uter	dolichol diffusion, human (uterus)	(0.1) dolichol_U[r] <==> (0.1) dolichol_U[c]	0	1	0	1	0	1	0	1	0	1
984	DOLK_U	Dolichol kinase, human (uterus)	[c] : ctp + (0.1) dolichol_U --> cdp + (0.1) dolp_U + h	0	1	0	1	0	1	0	1	0	1
985	DOLPH_Ler	Dolichol-phosphate phosphohydrolase, human (liver)	[r] : (0.1) dolp_L + h2o --> (0.1) dolichol_L + pi	0	1	0	1	0	1	0	1	0	1
986	DOLPH_Uer	Dolichol-phosphate phosphohydrolase, human (uterus)	[r] : (0.1) dolp_U + h2o --> (0.1) dolichol_U + pi	0	1	0	1	0	1	0	1	0	1
987	DOLDPP_Ler	Dolichyl-diphosphate phosphohydrolase, human (liver)	[r] : (0.1) doldp_L + h2o --> (0.1) dolp_L + h + pi	0	1	0	1	0	1	0	1	0	1
988	DOLDPP_Uer	Dolichyl-diphosphate phosphohydrolase, human (uterus)	[r] : (0.1) doldp_U + h2o --> (0.1) dolp_U + h + pi	0	1	0	1	0	1	0	1	0	1
989	DOLGPP_Ler	Dolichyl-beta-D-glucosyl-phosphate dolichylphosphohydrolase (liver)	[r] : (0.1) dolglcp_L + h2o --> (0.1) dolp_L + glc-D + h	0	1	0	1	0	1	0	1	0	1
990	DOLGPP_Uer	Dolichyl-beta-D-glucosyl-phosphate dolichylphosphohydrolase (uterus)	[r] : (0.1) dolglcp_U + h2o --> (0.1) dolp_U + glc-D + h	0	1	0	1	0	1	0	1	0	1
991	UDPDOLPT_L	UDPglucose:dolichyl-phosphate beta-D-glucosyltransferase (liver)	[c] : (0.1) dolp_L + udpg --> (0.1) dolglcp_L + udp	0	1	0	1	0	1	0	1	0	1
992	UDPDOLPT_U	UDPglucose:dolichyl-phosphate beta-D-glucosyltransferase (uterus)	[c] : (0.1) dolp_U + udpg --> (0.1) dolglcp_U + udp	0	1	0	1	0	1	0	1	0	1
993	DOLP_Lter	dolichol phosphate flippase (liver)	(0.1) dolp_L[r] --> (0.1) dolp_L[c]	0	1	0	1	0	1	0	1	0	1
994	DOLP_Uter	dolichol phosphate flippase (uterus)	(0.1) dolp_U[r] --> (0.1) dolp_U[c]	0	1	0	1	0	1	0	1	0	1
995	DOLPMT_L	Dolichyl-phosphate D-mannosyltransferase (liver)	[c] : (0.1) dolp_L + gdpmann --> (0.1) dolmanp_L + gdp	0	1	0	1	0	1	0	1	0	1
996	DOLPMT_U	Dolichyl-phosphate D-mannosyltransferase (uterus)	[c] : (0.1) dolp_U + gdpmann --> (0.1) dolmanp_U + gdp	0	1	0	1	0	1	0	1	0	1
997	GLCNACPT_L	UDP-GlcNAc:dolichol-phosphate GlcNAc phosphotransferase (liver)	[c] : (0.1) dolp_L + uacgam --> (0.1) naglc2p_L + ump	0	1	0	1	0	1	0	1	0	1
998	GLCNACPT_U	UDP-GlcNAc:dolichol-phosphate GlcNAc phosphotransferase (uterus)	[c] : (0.1) dolp_U + uacgam --> (0.1) naglc2p_U + ump	0	1	0	1	0	1	0	1	0	1
999	GLCNACT_L	UDP-GlcNAc:N-acetyl-D-glucosaminyl diphosphodolichol N-acetyl-D-glucosaminyltransferase (liver)	[c] : (0.1) naglc2p_L + uacgam --> (0.1) chito2pdol_L + h + udp	0	1	0	1	0	1	0	1	0	1
1000	GLCNACT_U	UDP-GlcNAc:N-acetyl-D-glucosaminyl diphosphodolichol N-acetyl-D-glucosaminyltransferase (uterus)	[c] : (0.1) naglc2p_U + uacgam --> (0.1) chito2pdol_U + h + udp	0	1	0	1	0	1	0	1	0	1
1001	BDMT_L	GDPmannose:chitobiosyldiphosphodolichol beta-D-mannosyltransferase (liver)	[c] : (0.1) chito2pdol_L + gdpmann --> gdp + h + (0.1) mpdol_L	0	1	0	1	0	1	0	1	0	1
1002	BDMT_U	GDPmannose:chitobiosyldiphosphodolichol beta-D-mannosyltransferase (uterus)	[c] : (0.1) chito2pdol_U + gdpmann --> gdp + h + (0.1) mpdol_U	0	1	0	1	0	1	0	1	0	1
1003	G12MT1_L	Glycolipid 1,2-alpha-D-mannosyltransferase (liver)	[c] : gdpmann + (0.1) m2mpdol_L --> gdp + h + (0.1) m3mpdol_L	0	1	0	1	0	1	0	1	0	1
1004	G12MT1_U	Glycolipid 1,2-alpha-D-mannosyltransferase (uterus)	[c] : gdpmann + (0.1) m2mpdol_U --> gdp + h + (0.1) m3mpdol_U	0	1	0	1	0	1	0	1	0	1
1005	G12MT2_L	Glycolipid 1,2-alpha-D-mannosyltransferase (liver)	[c] : gdpmann + (0.1) m3mpdol_L --> gdp + h + (0.1) m4mpdol_L	0	1	0	1	0	1	0	1	0	1
1006	G12MT2_U	Glycolipid 1,2-alpha-D-mannosyltransferase (uterus)	[c] : gdpmann + (0.1) m3mpdol_U --> gdp + h + (0.1) m4mpdol_U	0	1	0	1	0	1	0	1	0	1
1007	G13MT_L	Glycolipid 1,3-alpha-D-mannosyltransferase (liver)	[c] : gdpmann + (0.1) mpdol_L --> gdp + h + (0.1) m1mpdol_L	0	1	0	1	0	1	0	1	0	1
1008	G13MT_U	Glycolipid 1,3-alpha-D-mannosyltransferase (uterus)	[c] : gdpmann + (0.1) mpdol_U --> gdp + h + (0.1) m1mpdol_U	0	1	0	1	0	1	0	1	0	1
1009	G16MT_L	Glycolipid 1,6-alpha-D-mannosyltransferase (liver)	[c] : gdpmann + (0.1) m1mpdol_L --> gdp + h + (0.1) m2mpdol_L	0	1	0	1	0	1	0	1	0	1
1010	G16MT_U	Glycolipid 1,6-alpha-D-mannosyltransferase (uterus)	[c] : gdpmann + (0.1) m1mpdol_U --> gdp + h + (0.1) m2mpdol_U	0	1	0	1	0	1	0	1	0	1
1011	DOLMANP_Lter	dolichol-phosphate mannose flippase (liver)	(0.1) dolmanp_L[c] --> (0.1) dolmanp_L[r]	0	1	0	1	0	1	0	1	0	1
1012	DOLMANP_Uter	dolichol-phosphate mannose flippase (uterus)	(0.1) dolmanp_U[c] --> (0.1) dolmanp_U[r]	0	1	0	1	0	1	0	1	0	1
1013	DOLGLCP_Lter	Dolichyl beta-D-glucosyl phosphate flippase (liver)	(0.1) dolglcp_L[c] --> (0.1) dolglcp_L[r]	0	1	0	1	0	1	0	1	0	1
1014	DOLGLCP_Uter	Dolichyl beta-D-glucosyl phosphate flippase (uterus)	(0.1) dolglcp_U[c] --> (0.1) dolglcp_U[r]	0	1	0	1	0	1	0	1	0	1
1015	HISDC	histidine decarboxylase	[c] : h + his-L --> co2 + hista	0	1	0	1	0	1	0	1	0	1
1016	GGT_L	geranylgeranyltransferase (liver)	[c] : (17.6) ipdp + ttc-ggdp --> (0.1) dedoldp_L + (17.6) ppi	0	1	0	1	0	1	0	1	0	1
1017	PNTEH	Hydrolase Class ( RXN R02973)	[c] : h2o + ptth --> cysam + pnto-R	0	1	0	1	0	1	0	1	0	1
1018	DEDOLP1_L	dehydrodolichol diphosphate phosphatase (liver)	[c] : (0.1) dedoldp_L + h2o --> (0.1) dedolp_L + h + pi	0	1	0	1	0	1	0	1	0	1
1019	DEDOLP2_L	dehydrodolichol phosphate phosphatase (liver)	[c] : (0.1) dedolp_L + h2o --> (0.1) dedol_L + pi	0	1	0	1	0	1	0	1	0	1
1020	DEDOLR_L	dehydrodolichol reductase (liver)	[c] : (0.1) dedol_L + h + nadph --> (0.1) dolichol_L + nadp	0	1	0	1	0	1	0	1	0	1
1021	GGT_U	geranylgeranyltransferase (uterus)	[c] : (16.5) ipdp + ttc-ggdp --> (0.1) dedoldp_U + (16.5) ppi	0	1	0	1	0	1	0	1	0	1
1022	DEDOLP1_U	dehydrodolichol diphosphate phosphatase (uterus)	[c] : (0.1) dedoldp_U + h2o --> (0.1) dedolp_U + h + pi	0	1	0	1	0	1	0	1	0	1
1023	DEDOLP2_U	dehydrodolichol phosphate phosphatase (uterus)	[c] : (0.1) dedolp_U + h2o --> (0.1) dedol_U + pi	0	1	0	1	0	1	0	1	0	1
1024	DEDOLR_U	dehydrodolichol reductase (uterus)	[c] : (0.1) dedol_U + h + nadph --> (0.1) dolichol_U + nadp	0	1	0	1	0	1	0	1	0	1
1025	DOLASNT_Ler	Dolichyl-diphosphooligosaccharide:protein-L-asparagine oligopolysaccharidotransferase (liver)	[r] : Asn-X-Ser/Thr + (0.1) g3m8mpdol_L --> (0.1) doldp_L + g3m8masn + h	0	1	0	1	0	1	0	1	0	1
1026	DOLASNT_Uer	Dolichyl-diphosphooligosaccharide:protein-L-asparagine oligopolysaccharidotransferase (uterus)	[r] : Asn-X-Ser/Thr + (0.1) g3m8mpdol_U --> (0.1) doldp_U + g3m8masn + h	0	1	0	1	0	1	0	1	0	1
1027	MG1er	mannosyl-oligosaccharide glucosidase, endoplasmic reticulum	[r] : g3m8masn + h2o --> g2m8masn + glc-D	0	1	0	1	0	1	0	1	0	1
1028	MG2er	mannosyl-oligosaccharide glucosidase, endoplasmic reticulum	[r] : g2m8masn + h2o --> g1m8masn + glc-D	0	1	0	1	0	1	0	1	0	1
1029	MG3er	mannosyl-oligosaccharide glucosidase, endoplasmic reticulum	[r] : g1m8masn + h2o --> glc-D + m8masn	0	1	0	1	0	1	0	1	0	1
1030	DOLPMT4_Uer	dolichyl-phosphate-mannose-glycolipid alpha-mannosyltransferase (uterus)	[r] : (0.1) dolmanp_U + (0.1) m7mpdol_U --> (0.1) dolp_U + h + (0.1) m8mpdol_U	0	1	0	1	0	1	0	1	0	1
1031	DOLPMT4_Ler	dolichyl-phosphate-mannose-glycolipid alpha-mannosyltransferase (liver)	[r] : (0.1) dolmanp_L + (0.1) m7mpdol_L --> (0.1) dolp_L + h + (0.1) m8mpdol_L	0	1	0	1	0	1	0	1	0	1
1032	DOLPMT3_Uer	dolichyl-phosphate-mannose-glycolipid alpha-mannosyltransferase (uterus)	[r] : (0.1) dolmanp_U + (0.1) m6mpdol_U --> (0.1) dolp_U + h + (0.1) m7mpdol_U	0	1	0	1	0	1	0	1	0	1
1033	DOLPMT3_Ler	dolichyl-phosphate-mannose-glycolipid alpha-mannosyltransferase (liver)	[r] : (0.1) dolmanp_L + (0.1) m6mpdol_L --> (0.1) dolp_L + h + (0.1) m7mpdol_L	0	1	0	1	0	1	0	1	0	1
1034	DOLPMT2_Uer	dolichyl-phosphate-mannose-glycolipid alpha-mannosyltransferase (uterus)	[r] : (0.1) dolmanp_U + (0.1) m5mpdol_U --> (0.1) dolp_U + h + (0.1) m6mpdol_U	0	1	0	1	0	1	0	1	0	1
1035	DOLPMT2_Ler	dolichyl-phosphate-mannose-glycolipid alpha-mannosyltransferase (liver)	[r] : (0.1) dolmanp_L + (0.1) m5mpdol_L --> (0.1) dolp_L + h + (0.1) m6mpdol_L	0	1	0	1	0	1	0	1	0	1
1036	DOLPMT1_Uer	dolichyl-phosphate-mannose-glycolipid alpha-mannosyltransferase (uterus)	[r] : (0.1) dolmanp_U + (0.1) m4mpdol_U --> (0.1) dolp_U + h + (0.1) m5mpdol_U	0	1	0	1	0	1	0	1	0	1
1037	DOLPMT1_Ler	dolichyl-phosphate-mannose-glycolipid alpha-mannosyltransferase (liver)	[r] : (0.1) dolmanp_L + (0.1) m4mpdol_L --> (0.1) dolp_L + h + (0.1) m5mpdol_L	0	1	0	1	0	1	0	1	0	1
1038	DOLPGT3_Uer	dolichyl-phosphate-glucose-glycolipid alpha-glucosyltransferase (uterus)	[r] : (0.1) dolglcp_U + (0.1) g2m8mpdol_U --> (0.1) dolp_U + (0.1) g3m8mpdol_U + h	0	1	0	1	0	1	0	1	0	1
1039	DOLPGT3_Ler	dolichyl-phosphate-glucose-glycolipid alpha-glucosyltransferase (liver)	[r] : (0.1) dolglcp_L + (0.1) g2m8mpdol_L --> (0.1) dolp_L + (0.1) g3m8mpdol_L + h	0	1	0	1	0	1	0	1	0	1
1040	DOLPGT2_Uer	dolichyl-phosphate-glucose-glycolipid alpha-glucosyltransferase (uterus)	[r] : (0.1) dolglcp_U + (0.1) g1m8mpdol_U --> (0.1) dolp_U + (0.1) g2m8mpdol_U + h	0	1	0	1	0	1	0	1	0	1
1041	DOLPGT2_Ler	dolichyl-phosphate-glucose-glycolipid alpha-glucosyltransferase (liver)	[r] : (0.1) dolglcp_L + (0.1) g1m8mpdol_L --> (0.1) dolp_L + (0.1) g2m8mpdol_L + h	0	1	0	1	0	1	0	1	0	1
1042	DOLPGT1_Uer	dolichyl-phosphate-glucose-glycolipid alpha-glucosyltransferase (uterus)	[r] : (0.1) dolglcp_U + (0.1) m8mpdol_U --> (0.1) dolp_U + (0.1) g1m8mpdol_U + h	0	1	0	1	0	1	0	1	0	1
1043	DOLPGT1_Ler	dolichyl-phosphate-glucose-glycolipid alpha-glucosyltransferase (liver)	[r] : (0.1) dolglcp_L + (0.1) m8mpdol_L --> (0.1) dolp_L + (0.1) g1m8mpdol_L + h	0	1	0	1	0	1	0	1	0	1
1044	MM8Ber	mannosyl-oligosaccharide 1,2-alpha-mannosidase, endoplasmic reticulum	[r] : h2o + m8masn --> m7masnB + man	0	1	0	1	0	1	0	1	0	1
1045	MM8Ag	mannosyl-oligosaccharide 1,2-alpha-mannosidase, Golgi apparatus	[g] : h2o + m8masn --> m7masnA + man	0	1	0	1	0	1	0	1	0	1
1046	MM8Cg	mannosyl-oligosaccharide 1,2-alpha-mannosidase, Golgi apparatus	[g] : h2o + m8masn --> m7masnC + man	0	1	0	1	0	1	0	1	0	1
1047	MM7B1g	mannosyl-oligosaccharide 1,2-alpha-mannosidase, Golgi apparatus	[g] : h2o + m7masnB --> m6masnB1 + man	0	1	0	1	0	1	0	1	0	1
1048	MM7B2g	mannosyl-oligosaccharide 1,2-alpha-mannosidase, Golgi apparatus	[g] : h2o + m7masnB --> m6masnB2 + man	0	1	0	1	0	1	0	1	0	1
1049	MM6B1ag	mannosyl-oligosaccharide 1,2-alpha-mannosidase, Golgi apparatus	[g] : h2o + m6masnB1 --> m5masnB1 + man	0	1	0	1	0	1	0	1	0	1
1050	MM6B1bg	mannosyl-oligosaccharide 1,2-alpha-mannosidase, Golgi apparatus	[g] : h2o + m6masnB2 --> m5masnB1 + man	0	1	0	1	0	1	0	1	0	1
1051	MM6B2g	mannosyl-oligosaccharide 1,2-alpha-mannosidase, Golgi apparatus	[g] : h2o + m6masnB2 --> m5masnB2 + man	0	1	0	1	0	1	0	1	0	1
1052	MM5bg	mannosyl-oligosaccharide 1,2-alpha-mannosidase, Golgi apparatus	[g] : h2o + m5masnB1 --> m4masn + man	0	1	0	1	0	1	0	1	0	1
1053	MM5cg	mannosyl-oligosaccharide 1,2-alpha-mannosidase, Golgi apparatus	[g] : h2o + m5masnB2 --> m4masn + man	0	1	0	1	0	1	0	1	0	1
1054	MM7Cbg	mannosyl-oligosaccharide 1,2-alpha-mannosidase, Golgi apparatus	[g] : h2o + m7masnC --> m6masnC + man	0	1	0	1	0	1	0	1	0	1
1055	MM7Cag	mannosyl-oligosaccharide 1,2-alpha-mannosidase, Golgi apparatus	[g] : h2o + m7masnA --> m6masnC + man	0	1	0	1	0	1	0	1	0	1
1056	MM7Ag	mannosyl-oligosaccharide 1,2-alpha-mannosidase, Golgi apparatus	[g] : h2o + m7masnA --> m6masnA + man	0	1	0	1	0	1	0	1	0	1
1057	MM6ag	mannosyl-oligosaccharide 1,2-alpha-mannosidase, Golgi apparatus	[g] : h2o + m6masnA --> m5masnC + man	0	1	0	1	0	1	0	1	0	1
1058	MM6bg	mannosyl-oligosaccharide 1,2-alpha-mannosidase, Golgi apparatus	[g] : h2o + m6masnC --> m5masnC + man	0	1	0	1	0	1	0	1	0	1
1059	MM5ag	mannosyl-oligosaccharide 1,2-alpha-mannosidase, Golgi apparatus	[g] : h2o + m5masnC --> m4masn + man	0	1	0	1	0	1	0	1	0	1
1060	M13N2Tg	alpha-1,3-mannosyl-glycoprotein 2-beta-N-acetylglucosaminyltransferase	[g] : m4masn + uacgam --> h + nm4masn + udp	0	1	0	1	0	1	0	1	0	1
1061	M7MASNBterg	m7masnB transport from endoplasmic reticulum to Golgi apparatus	m7masnB[r] --> m7masnB[g]	0	1	0	1	0	1	0	1	0	1
1062	G1M8MASNterg	g1m8masn transport from endoplasmic reticulum to Golgi apparatus	g1m8masn[r] --> g1m8masn[g]	0	1	0	1	0	1	0	1	0	1
1063	M1316Mg	mannosyl-oligosaccharide 1,3-1,6-alpha-mannosidase	[g] : (2) h2o + nm4masn --> (2) man + nm2masn	0	1	0	1	0	1	0	1	0	1
1064	M16NTg	alpha-1,6-mannosyl-glycoprotein 2-beta-N-acetylglucosaminyltransferase	[g] : nm2masn + uacgam --> h + n2m2masn + udp	0	1	0	1	0	1	0	1	0	1
1065	F6Tg	glycoprotein 6-alpha-L-fucosyltransferase	[g] : gdpfuc + n2m2masn --> fn2m2masn + gdp + h	0	1	0	1	0	1	0	1	0	1
1066	G14Tg	beta-N-acetylglucosaminylglycopeptide beta-1,4-galactosyltransferase	[g] : fn2m2masn + (2) udpgal --> (2) h + l2fn2m2masn + (2) udp	0	1	0	1	0	1	0	1	0	1
1067	S26Tg	beta-galactoside alpha-2,6-sialyltransferase	[g] : (2) cmpacna + l2fn2m2masn --> (2) cmp + (2) h + s2l2fn2m2masn	0	1	0	1	0	1	0	1	0	1
1068	M14NTg	beta-1,4-mannosyl-glycoprotein 4-beta-N-acetylglucosaminyltransferase	[g] : n2m2masn + uacgam --> h + n2m2nmasn + udp	0	1	0	1	0	1	0	1	0	1
1069	M13N4Tg	alpha-1,3-mannosyl-glycoprotein 4-beta-N-acetylglucosaminyltransferase	[g] : n2m2masn + uacgam --> h + n3m2masn + udp	0	1	0	1	0	1	0	1	0	1
1070	M16N6Tg	alpha-1,6-mannosyl-glycoprotein 6-beta-N-acetylglucosaminyltransferase	[g] : n3m2masn + uacgam --> h + n4m2masn + udp	0	1	0	1	0	1	0	1	0	1
1071	M16N4Tg	alpha-1,6-mannosyl-glycoprotein 4-beta-N-acetylglucosaminyltransferase	[g] : n4m2masn + uacgam --> h + n5m2masn + udp	0	1	0	1	0	1	0	1	0	1
1072	GTPCI	GTP cyclohydrolase I	[c] : gtp + h2o --> ahdt + for + h	0	1	0	1	0	1	0	1	0	1
1073	PTHPS	6-pyruvoyltetrahydropterin synthase	[c] : ahdt --> 6pthp + pppi	0	1	0	1	0	1	0	1	0	1
1074	METS	methionine synthase	[c] : 5mthf + hcys-L --> h + met-L + thf	0	1	0	1	0	1	0	1	0	1
1075	MTHFC	methenyltetrahydrofolate cyclohydrolase	[c] : h2o + methf <==> 10fthf + h	12.616	0.107776	23.2949	0.477587	30.0064	0.122871	29.2302	0.853174	25.9659	0.420777
1076	MTHFCm	methenyltetrahydrifikate cyclohydrolase, mitochondrial	[m] : h2o + methf <==> 10fthf + h	11.9913	0.135388	22.4947	0.523536	28.3223	0.193194	25.0954	0.744647	19.4835	0.783278
1077	MTHFD	methylenetetrahydrofolate dehydrogenase (NADP)	[c] : mlthf + nadp <==> methf + nadph	9.06714	0.298641	16.1625	0.347122	21.2951	0.236245	20.3775	0.0813331	16.8889	0.67418
1078	MTHFDm	methylenetetrahydrofolate dehydrogenase (NADP), mitochondrial	[m] : mlthf + nadp <==> methf + nadph	12.3591	0.92653	18.2622	0.998099	19.2289	0.472736	15.465	0.765261	11.9571	0.57028
1079	MTHFR3	5,10-methylenetetrahydrofolatereductase (NADPH)	[c] : (2) h + mlthf + nadph --> 5mthf + nadp	0.00354025	0.800105	0.00459219	0.994388	0.00495843	1	0.0047002	1	0.00466257	1
1080	IZPN	imidazolonepropionase	[c] : 4izp + h2o --> forglu + h	0.591662	0.123654	0.758721	0.570507	1.58723	0.521046	3.9325	0.98976	6.20845	0.678157
1081	ACS2	acetyl-CoA synthase (propionate)	[c] : atp + coa + ppa --> amp + ppcoa + ppi	0	1	0	1	0	1	0	1	0	1
1082	M4MPDOL_Lter	m4mpdol flippase	m4mpdol_L[c] --> m4mpdol_L[r]	0	1	0	1	0	1	0	1	0	1
1083	M4MPDOL_Uter	m4mpdol flippase	m4mpdol_U[c] --> m4mpdol_U[r]	0	1	0	1	0	1	0	1	0	1
1084	M8MASNterg	m8masn transport from ER to Golgi apparatus	m8masn[r] --> m8masn[g]	0	1	0	1	0	1	0	1	0	1
1085	G2M8MASNterg	g2m8masn transport from endoplasmic reticulum to Golgi apparatus	g2m8masn[r] --> g2m8masn[g]	0	1	0	1	0	1	0	1	0	1
1086	G3M8MASNterg	g3m8masn transport from endoplasmic reticulum to Golgi apparatus	g3m8masn[r] --> g3m8masn[g]	0	1	0	1	0	1	0	1	0	1
1087	ENMAN3g	Endomannosidase (glc3man-producing), Golgi apparatus	[g] : g3m8masn + h2o --> glc3man + m7masnA	0	1	0	1	0	1	0	1	0	1
1088	ENMAN2g	Endomannosidase (glc2man-producing), Golgi apparatus	[g] : g2m8masn + h2o --> glc2man + m7masnA	0	1	0	1	0	1	0	1	0	1
1089	ENMAN1g	Endomannosidase (glc1man-producing), Golgi apparatus	[g] : g1m8masn + h2o --> glc1man + m7masnA	0	1	0	1	0	1	0	1	0	1
1090	MAN1_7Ber	mannosidase I, endoplasmic reticulum (g1m7masnB-producing)	[r] : g1m8masn + h2o --> g1m7masnB + man	0	1	0	1	0	1	0	1	0	1
1091	MAN2_7Cer	mannosidase II, endoplasmic reticulum (g1m7masnC-producing)	[r] : g1m8masn + h2o --> g1m7masnC + man	0	1	0	1	0	1	0	1	0	1
1092	MAN1_6B1er	mannosidase I, endoplasmic reticulum (g1m6masnB1-producing)	[r] : g1m7masnC + h2o --> g1m6masnB1 + man	0	1	0	1	0	1	0	1	0	1
1093	MAN2_6B1er	mannosidase II, endoplasmic reticulum (g1m6masnB1-producing)	[r] : g1m7masnB + h2o --> g1m6masnB1 + man	0	1	0	1	0	1	0	1	0	1
1094	G1M7MASNCterg	g1m7masnC endoplasmic reticulum to Golgi transport	g1m7masnC[r] --> g1m7masnC[g]	0	1	0	1	0	1	0	1	0	1
1095	G1M7MASNBterg	g1m7masnC endoplasmic reticulum to Golgi transport	g1m7masnB[r] --> g1m7masnB[g]	0	1	0	1	0	1	0	1	0	1
1096	ENMAN4g	Endomannosidase (m6masnC-producing), Golgi apparatus	[g] : g1m7masnC + h2o --> glc1man + m6masnC	0	1	0	1	0	1	0	1	0	1
1097	ENMAN5g	Endomannosidase (m6masnB2-producing), Golgi apparatus	[g] : g1m7masnB + h2o --> glc1man + m6masnB2	0	1	0	1	0	1	0	1	0	1
1098	ENMAN6g	Endomannosidase (m5masnB1-producing), Golgi apparatus	[g] : g1m6masnB1 + h2o --> glc1man + m5masnB1	0	1	0	1	0	1	0	1	0	1
1099	FACOAL80i	fatty-acid--CoA ligase (octanoate)	[c] : atp + coa + octa --> amp + occoa + ppi	0	1	0	1	0	1	0	1	0	1
1100	FACOAL140i	fatty-acid--CoA ligase (tetradecanoate)	[c] : atp + coa + ttdca --> amp + ppi + tdcoa	0	1	0	1	0	1	0	1	0	1
1101	G1M6MASNB1terg	g1m6masnB1 endoplasmic reticulum to Golgi transport	g1m6masnB1[r] --> g1m6masnB1[g]	0	1	0	1	0	1	0	1	0	1
1102	FAOXC80	Beta oxidation of med/long chain fatty acid	[m] : (3) coa + (3) fad + (3) h2o + (3) nad + occoa --> (4) accoa + (3) fadh2 + (3) h + (3) nadh	0	1	0	1	0	1	0	1	0	1
1103	OCCOAtm	Octanoyl-CoA transport, diffusion	occoa[c] --> occoa[m]	0	1	0	1	0	1	0	1	0	1
1104	FUMtm	fumarate transport, mitochondrial	fum[c] + pi[m] <==> fum[m] + pi[c]	0.25797	0.470098	1.29142	0.361231	1.9262	0.946095	1.92229	0.987526	1.41283	0.97409
1105	MMEm	methylmalonyl-CoA epimerase/racemase	[m] : mmcoa-R <==> mmcoa-S	0	1	0	1	0	1	0	1	0	1
1106	ACCOACm	Acetyl-Coa carboxylase, beta isoform	[m] : accoa + atp + hco3 --> adp + h + malcoa + pi	0	1	0	1	0	1	0	1	0	1
1107	MCDm	Malonyl-CoA Decarboxylase, mitochondrial	[m] : h + malcoa --> accoa + co2	0	1	0	1	0	1	0	1	0	1
1108	CSNATm	carnitine O-aceyltransferase, mitochondrial	[m] : acrn + coa <==> accoa + crn	0	1	0	1	0	1	0	1	0	1
1109	ACCOALm	acetate-CoA ligase (AMP-forming)	[m] : atp + coa + ppa --> amp + ppcoa + ppi	0	1	0	1	0	1	0	1	0	1
1110	PPAtm	Propionate transport, diffusion	ppa[c] --> ppa[m]	0	1	0	1	0	1	0	1	0	1
1111	CSNAT2m	carnitine O-aceyltransferase, mitochondrial	[m] : coa + pcrn <==> crn + ppcoa	0	1	0	1	0	1	0	1	0	1
1112	ENGASE	endo-beta-N-acetylglucosaminidase	[c] : h2o + s2l2n2m2m --> acgam + s2l2n2m2mn	0	1	0	1	0	1	0	1	0	1
1113	SIAASE	sialidase	[c] : (2) h2o + s2l2n2m2mn --> (2) acnam + l2n2m2mn	0	1	0	1	0	1	0	1	0	1
1114	A_MANASE	alpha-mannosidase	[c] : (2) h2o + m2mn --> (2) man + mn	0	1	0	1	0	1	0	1	0	1
1115	ENGASE2	endo-beta-N-acetylglucosaminidase	[c] : h2o + n2m2nm --> acgam + n2m2nmn	0	1	0	1	0	1	0	1	0	1
1116	PHEMEtm	Heme transport to cytosol	pheme[m] <==> pheme[c]	0	1	0	1	0	1	0	1	0	1
1117	A_MANASEly	alpha-mannosidase, lysosomal	[l] : (2) h2o + m2mn --> (2) man + mn	0	1	0	1	0	1	0	1	0	1
1118	AHEXASE2ly	beta-N-acetylhexosaminidase, lysosomal	[l] : (3) h2o + n2m2nmn --> (3) acgam + m2mn	0	1	0	1	0	1	0	1	0	1
1119	AHEXASEly	beta-N-acetylhexosaminidase, lysosomal	[l] : (2) h2o + n2m2mn --> (2) acgam + m2mn	0	1	0	1	0	1	0	1	0	1
1120	B_MANNASEly	beta-mannosidase, lysosomal	[l] : h2o + mn --> acgam + man	0	1	0	1	0	1	0	1	0	1
1121	ENGASE2ly	endo-beta-N-acetylglucosaminidase, lysosomal	[l] : h2o + n2m2nm --> acgam + n2m2nmn	0	1	0	1	0	1	0	1	0	1
1122	ENGASEly	endo-beta-N-acetylglucosaminidase, lysosomal	[l] : h2o + s2l2n2m2m --> acgam + s2l2n2m2mn	0	1	0	1	0	1	0	1	0	1
1123	FUCASEly	alpha-fucosidase, lysosomal	[l] : h2o + s2l2fn2m2masn --> fuc-L + s2l2n2m2masn	0	1	0	1	0	1	0	1	0	1
1124	GALASE1ly	beta-galactosidase, lysosomal	[l] : (2) h2o + l2n2m2mn --> (2) gal + n2m2mn	0	1	0	1	0	1	0	1	0	1
1125	GASNASE2ly	glycosylasparaginase, lysosomal	[l] : h2o + n2m2nmasn --> Asn-X-Ser/Thr + n2m2nm	0	1	0	1	0	1	0	1	0	1
1126	GASNASEly	glycosylasparaginase, lysosomal	[l] : h2o + s2l2n2m2masn --> Asn-X-Ser/Thr + s2l2n2m2m	0	1	0	1	0	1	0	1	0	1
1127	SIAASEly	sialidase, lysosomal	[l] : (2) h2o + s2l2n2m2mn --> (2) acnam + l2n2m2mn	0	1	0	1	0	1	0	1	0	1
1128	SLDx	L-sulfolactate dehydrogenase (NAD+)	[c] : nad + sl-L <==> 3spyr + h + nadh	0	1	0	1	0	1	0	1	0	1
1129	GALNTg	GalNAc transferase, Golgi apparatus	[g] : Ser/Thr + udpacgal --> Tn_antigen + h + udp	0	1	0	1	0	1	0	1	0	1
1130	NS26Tg	alpha-N-acetylgalactosaminide alpha-2,6-sialyltransferase	[g] : Tn_antigen + cmpacna --> cmp + h + sTn_antigen	0	1	0	1	0	1	0	1	0	1
1131	N3Tg	N-acetylgalactosamine 3-beta-galactosyltransferase, Golgi apparatus	[g] : Tn_antigen + udpgal --> T_antigen + h + udp	0	1	0	1	0	1	0	1	0	1
1132	CORE2GTg	Core 2 acetylglucosaminyltransferase, Golgi apparatus	[g] : T_antigen + uacgam --> core2 + h + udp	0	1	0	1	0	1	0	1	0	1
1133	S23Tg	beta-galactoside alpha-2,3-sialyltransferase (T antigen)	[g] : T_antigen + cmpacna --> cmp + h + sT_antigen	0	1	0	1	0	1	0	1	0	1
1134	NS26T2g	alpha-N-acetylgalactosaminide alpha-2,6-sialyltransferase	[g] : cmpacna + sT_antigen --> cmp + dsT_antigen + h	0	1	0	1	0	1	0	1	0	1
1135	CORE3GTg	Core 3 beta-GlcNAc-transferase, Golgi apparatus	[g] : Tn_antigen + uacgam --> core3 + h + udp	0	1	0	1	0	1	0	1	0	1
1136	CORE4GTg	Core 4 beta6-GalNAc-transferase, Golgi apparatus	[g] : core3 + uacgam --> core4 + h + udp	0	1	0	1	0	1	0	1	0	1
1137	CORE6GTg	Core 6 beta-GlcNAc-transferase A, Golgi apparatus	[g] : Tn_antigen + uacgam --> core6 + h + udp	0	1	0	1	0	1	0	1	0	1
1138	CORE5GTg	Core 5 alpha-GalNAc-transferase, Golgi apparatus	[g] : Tn_antigen + udpacgal --> core5 + h + udp	0	1	0	1	0	1	0	1	0	1
1139	CORE7GTg	Core 7 alpha-GalNAc-transferase, Golgi apparatus	[g] : Tn_antigen + udpacgal --> core7 + h + udp	0	1	0	1	0	1	0	1	0	1
1140	CORE8GTg	N-acetylgalactosamine 3-alpha-galactosyltransferase, Golgi apparatus	[g] : Tn_antigen + udpgal --> core8 + h + udp	0	1	0	1	0	1	0	1	0	1
1141	N4Tg	N-acetylgalactosamine 4-beta-galactosyltransferase, Golgi apparatus	[g] : core6 + udpgal --> f1a + h + udp	0	1	0	1	0	1	0	1	0	1
1142	A4GNT2g	alpha 1,4-N-acetylglucosaminyltransferase, Golgi apparatus	[g] : core2 + uacgam --> gncore2 + h + udp	0	1	0	1	0	1	0	1	0	1
1143	A4GNT1g	alpha 1,4-N-acetylglucosaminyltransferase, Golgi apparatus	[g] : T_antigen + uacgam --> gncore1 + h + udp	0	1	0	1	0	1	0	1	0	1
1144	FOLR2	folate reductase	[c] : fol + nadph --> dhf + nadp	0	1	0	1	0	1	0	1	0	1
1145	IMACTD	Imidazole acetaldeyde dehydrogenase	[c] : h2o + im4act + nad --> (2) h + im4ac + nadh	0	1	0	1	0	1	0	1	0	1
1146	IMACTD_m	Imidazole acetaldeyde dehydrogenase (mito)	[m] : h2o + im4act + nad --> (2) h + im4ac + nadh	0	1	0	1	0	1	0	1	0	1
1147	NACASPAH	N-Acetyl-L-aspartate amidohydrolase	[c] : Nacasp + h2o --> ac + asp-L	0.000239358	1	0.000295077	1	0.000564596	1	0.000609559	1	0	1
1148	SAMHISTA	S-Adenosyl-L-methionine:histamine N-tele-methyltransferase	[c] : amet + hista --> ahcys + h + mhista	0	1	0	1	0	1	0	1	0	1
1149	MHISOR	N-Methylhistamine:oxygen oxidoreductase (deaminating)	[c] : h2o + mhista + o2 --> 3mldz + h2o2 + nh4	0	1	0	1	0	1	0	1	0	1
1150	MACOXO	3-Methylimidazole acetaldehyde:NAD+ oxidoreductase	[c] : 3mldz + h2o + nad --> 3mlda + (2) h + nadh	0	1	0	1	0	1	0	1	0	1
1151	GLUDxm	glutamate dehydrogenase (NAD) (mitochondrial)	[m] : glu-L + h2o + nad <==> akg + h + nadh + nh4	-11.598	0.716877	-17.6455	0.774478	-19.1126	0.861406	-16.8615	0.64173	-12.6361	0.858321
1152	GLUDym	glutamate dehydrogenase (NADP), mitochondrial	[m] : glu-L + h2o + nadp <==> akg + h + nadph + nh4	-0.302861	0.60288	-4.73329	0.562799	-9.08377	0.297137	-8.11124	0.669332	-6.73132	0.963091
1153	GluForTx	Glutamate formimidoyltransferase	[c] : forglu + h + thf --> 5forthf + glu-L	0.591662	0.123654	0.758721	0.570507	1.58723	0.521046	3.9325	0.98976	6.20845	0.678157
1154	GLUNm	glutaminase (mitochondrial)	[m] : gln-L + h2o --> glu-L + nh4	0.00161792	1	0.000874875	1	0.00454082	1	0.010094	1	0.0170774	1
1155	ABTArm	4-aminobutyrate transaminase, reversible (mitochondrial)	[m] : 4abut + akg <==> glu-L + sucsal	0	1	0	1	0	1	0	1	0.00021111	1
1156	ACGAMK	N-acetylglucosamine kinase	[c] : acgam + atp --> acgam6p + adp + h	0	1	0	1	0	1	0	1	0	1
1157	CBPSam	carbamoyl-phosphate synthase (ammonia) (mitochondria	[m] : (2) atp + hco3 + nh4 --> (2) adp + cbp + (2) h + pi	0.0803336	0.107625	0.101952	0.570507	0.113923	0.290325	0.115996	1	0.116238	1
1158	ASNNm	L-asparaginase (mitochondrial)	[m] : asn-L + h2o --> asp-L + nh4	0	1	0	1	0	1	0	1	0	1
1159	TYRASE	Tyrosinase	[c] : 56dihindlcrbxlt --> melanin	0	1	0	1	0	1	0	1	0	1
1160	3HLYTCL	3-Hydroxy-L-tyrosine carboxy-lyase	[c] : 34dhphe + h --> co2 + dopa	0	1	0	1	0	1	0	1	0	1
1161	MAOLNOR	monoamine oxidase (L-Normetanephrine)	[c] : h2o + normete-L + o2 --> 3m4hpga + h2o2 + nh4	0	1	0	1	0	1	0	1	0	1
1162	41R1H2MAE12BOOX	4-[(1R)-1-Hydroxy-2-(methylamino)ethyl]-1,2-benzenediol:oxygen oxidoreductase(deaminating)(flavin-containing)	[c] : adrnl + h2o + o2 --> 34dhmald + h2o2 + mma	0	1	0	1	0	1	0	1	0	1
1163	ASPCTr	aspartate carbamoyltransferase (reversible)	[c] : asp-L + cbp <==> cbasp + h + pi	0.000827	1	0.000827	1	0.000827	1	0.000827	1	0.000827	1
1164	CSNATer	carnitine O-acetyltransferase, endolasmic reticulum	[r] : accoa + crn <==> acrn + coa	0	1	0	1	0	1	0	1	0	1
1165	42A12BOOX	4-(2-Aminoethyl)-1,2-benzenediol:oxygen oxidoreductase(deaminating)(flavin-containing)	[c] : dopa + h2o + o2 --> 34dhpac + h2o2 + nh4	0	1	0	1	0	1	0	1	0	1
1166	3M4HDXPAC	3-Methoxy-4-hydroxyphenylacetaldehyde:NAD+ oxidoreductase	[c] : 3mox4hpac + h2o + nad <==> (2) h + homoval + nadh	0	1	0	1	0	1	0	1	0	1
1167	34DHPLACOX(NADP)	3,4-Dihydroxyphenylacetaldehyde:NADP+ oxidoreductase	[c] : 34dhpac + h2o + nadp <==> 34dhpha + (2) h + nadph	-0.188959	1	-0.327745	1	-0.410842	1	-0.28837	1	-0.24348	1
1168	34DHXMANDACOX(NADP)	3,4-Dihydroxymandelaldehyde:NADP+ oxidoreductase	[c] : 34dhmald + h2o + nadp <==> 34dhoxmand + (2) h + nadph	-0.130907	1	-0.131487	1	-0.204078	1	-0.242908	1	-0.198712	1
1169	3MOX4HOXPGALDOX(NADP)	3-Methoxy-4-hydroxyphenylglycolaldehyde:NADP+ oxidoreductase	[c] : 3m4hpga + h2o + nadp <==> 3mox4hoxm + (2) h + nadph	-0.133195	1	-0.147413	1	-0.134761	1	-0.0388914	1	-0.0148261	1
1170	4HOXPACDOX(NADP)	4-Hydroxyphenylacetaldehyde:NADP+ oxidoreductase	[c] : 4hoxpacd + h2o + nadp <==> 4hphac + (2) h + nadph	0	1	0	1	0	1	0	1	0	1
1171	34DHOXPEGOX	3,4-Dihydroxyphenylethyleneglycol:NAD+ oxidoreductase	[c] : 34dhmald + h + nadh <==> 34dhoxpeg + nad	0	1	0	1	0	1	0	1	0	1
1172	IDHPOXOX3	Iodide:hydrogen-peroxide oxidoreductase 3	[c] : 35diotyr + 3ityr-L + h2o2 --> 2amac + (2) h2o + triodthy	0	1	0	1	0	1	0	1	0	1
1173	IDHPOXOX4	Iodide:hydrogen-peroxide oxidoreductase 4	[c] : (2) 35diotyr + h2o2 --> 2amac + (2) h2o + thyox-L	0	1	0	1	0	1	0	1	0	1
1174	PPNCL3	phosphopantothenate-cysteine ligase	[c] : 4ppan + atp + cys-L --> 4ppcys + amp + h + ppi	0	1	0	1	0	1	0	1	0	1
1175	PNTKm	pantothenate kinase (mitochondrial)	[m] : atp + pnto-R --> 4ppan + adp + h	0	1	0	1	0	1	0	1	0	1
1176	THMTP	thiamine-triphosphatase	[c] : h2o + thmtp --> h + pi + thmpp	0	1	0	1	0	1	0	1	0	1
1177	TDP	thiamin pyrophosphatase	[c] : h2o + thmpp --> h + pi + thmmp	0	1	0	1	0	1	0	1	0	1
1178	PHETA1m	phenylalanine transaminase (m)	[m] : akg + phe-L <==> glu-L + phpyr	0	1	0	1	0	1	0	1	0	1
1179	PHYCBOXL	L-Phenylalanine carboxy-lyase	[c] : h + phe-L --> co2 + peamn	0	1	0	1	0	1	0	1	0	1
1180	ALDD19x(P)	aldehyde dehydrogenase (phenylacetaldehyde, NADP)	[c] : h2o + nadp + pacald --> (2) h + nadph + pac	0	1	0	1	0	1	0	1	0	1
1181	QUILSYN	Quinolinate Synthase (Eukaryotic)	[c] : cmusa --> h + h2o + quln	0	1	0	1	0	1	0	1	0	1
1182	2OXOADOXm	2-Oxoadipate:lipoamde 2-oxidoreductase(decarboxylating and acceptor-succinylating) (mitochondria)	[m] : 2oxoadp + coa + nad --> co2 + glutcoa + nadh	0	1	0	1	0.0018606	1	0.00391668	1	0.00509265	1
1183	GLUTCOADHm	glutaryl-CoA dehydrogenase (mitochondria)	[m] : fad + glutcoa + h --> b2coa + co2 + fadh2	0	1	0	1	0.0018606	1	0.00391668	1	0.00509265	1
1184	ECOAH1m	3-hydroxyacyl-CoA dehydratase (3-hydroxybutanoyl-CoA) (mitochondria)	[m] : 3hbcoa <==> b2coa + h2o	0	1	0	1	-0.0018606	1	-0.00391668	1	-0.00509265	1
1185	ECOAH1x	3-hydroxyacyl-CoA dehydratase (3-hydroxybutanoyl-CoA) (perioxisome)	[x] : 3hbcoa <==> b2coa + h2o	0	1	0	1	0	1	0	1	0	1
1186	HACD1m	3-hydroxyacyl-CoA dehydrogenase (acetoacetyl-CoA) (mitochondria)	[m] : aacoa + h + nadh <==> 3hbcoa + nad	0	1	0	1	-0.0018606	1	-0.00391668	1	-0.00509265	1
1187	HACD1x	3-hydroxyacyl-CoA dehydrogenase (acetoacetyl-CoA) (peroxisome)	[x] : aacoa + h + nadh <==> 3hbcoa + nad	0	1	0	1	0	1	0	1	0	1
1188	KYNAKGAT	L-Kynurenine:2-oxoglutarate aminotransferase	[c] : Lkynr + akg --> 4aphdob + glu-L	0	1	0	1	0	1	0	1	0	1
1189	3HKYNAKGAT	3-Hydroxy-L-kynurenine:2-oxoglutarate aminotransferase	[c] : akg + hLkynr --> 42A3HP24DB + glu-L	0	1	0	1	0	1	0	1	0	1
1190	DURAD	dihydrouracil dehydrogenase (NADP)	[c] : 56dura + nadp <==> h + nadph + ura	0	1	0	1	0	1	0	1	0	1
1191	DURAD2	dihydrothymin dehydrogenase (NADP)	[c] : 56dthm + nadp <==> h + nadph + thym	0	1	0	1	0	1	0	1	0	1
1192	ALCD2yf	alcohol dehydrogenase (ethanol, NADP), forward reaction	[c] : etoh + nadp --> acald + h + nadph	0	1	0	1	0	1	0	1	0	1
1193	ACITL	ATP-Citrate lyase	[c] : atp + cit + coa --> accoa + adp + oaa + pi	0	1	0.00169702	1	0.0449983	0.996404	0.093223	0.999401	0.107455	0.83964
1194	NNATn	nicotinate-nucleotide adenylyltransferase	[n] : atp + h + nicrnt --> dnad + ppi	0	1	0	1	0	1	0.000166707	1	0	1
1195	NMNATn	nicotinamide-nucleotide adenylyltransferase	[n] : atp + h + nmn --> nad + ppi	0	1	0	1	0.000179192	1	0.000182679	1	0.000262291	1
1196	MCDp	Malonyl-CoA Decarboxylase peroxisomal	[x] : h + malcoa --> accoa + co2	0	1	0	1	0	1	0	1	0	1
1197	MCD	Malonyl-CoA Decarboxylase cytoplasmic	[c] : h + malcoa --> accoa + co2	0	1	0	1	0	1	0	1	0	1
1198	G6PDH1er	glucose-6-phosphate dehydrogenase, endoplasmic reticulum	[r] : g6p + nad --> 6pgl + h + nadh	0	1	0	1	4.63954e-05	1	6.08929e-05	1	0	1
1199	PGLer	6-phosphogluconolactonase, endoplasmic reticulum	[r] : 6pgl + h2o --> 6pgc + h	0	1	0	1	0	1	0	1	0	1
1200	P4507A1r	cytochrome P450, family 7, subfamily A, polypeptide 1	[r] : chsterol + h + nadph + o2 --> h2o + nadp + xol7a	0	1	0	1	0	1	0	1	0	1
1201	P45046A1r	cytochrome P450, family 46, subfamily A, polypeptide 1	[r] : chsterol + h + nadph + o2 --> h2o + nadp + xol24oh	0	1	0	1	0	1	0	1	0	1
1202	CH25H	cholesterol 25-hydroxylase	[r] : chsterol + h + nadph + o2 --> h2o + nadp + xol25oh	0	1	0	1	0	1	0	1	0	1
1203	P45027A1m	Cytochrome P450 27	[m] : chsterol + h + nadph + o2 --> h2o + nadp + xol27oh	0	1	0	1	0	1	0	1	0	1
1204	P45039A1r	oxysterol 7-alpha-hydroxylase	[r] : h + nadph + o2 + xol24oh --> h2o + nadp + xoltri24	0	1	0	1	0	1	0	1	0	1
1205	P4507B11r	oxysterol 7alpha-hydroxylase	[r] : h + nadph + o2 + xol25oh --> h2o + nadp + xoltri25	0	1	0	1	0	1	0	1	0	1
1206	P4507B12r	oxysterol 7alpha-hydroxylase	[r] : h + nadph + o2 + xol27oh --> h2o + nadp + xoltri27	0	1	0	1	0	1	0	1	0	1
1207	5HXKYNDCL	5-Hydroxykynurenamine decarboxy-lyase	[c] : 5hxkyn + h --> 5hxkynam + co2	0	1	0	1	0	1	0	1	0	1
1208	3HXKYNDCL	3-Hydroxykynurenamine decarboxy-lyase	[c] : h + hLkynr --> 3hxkynam + co2	0	1	0	1	0	1	0	1	0	1
1209	5HLTDL	5-Hydroxy-L-tryptophan decarboxy-lyase	[c] : 5htrp + h --> co2 + srtn	0	1	0	1	0	1	0	1	0	1
1210	LTDCL	L-Tryptophan decarboxy-lyase	[c] : h + trp-L --> co2 + trypta	0	1	0	1	0	1	0	1	0	1
1211	5HXKYNOXDA	5-Hydroxykynurenamine:oxygen oxidoreductase(deaminating)(flavin-containing)	[c] : 5hxkynam + o2 --> 46dhoxquin + h2o2 + nh4	0	1	0	1	0	1	0	1	0	1
1212	3HXKYNOXDA	3-Hydroxykynurenamine:oxygen oxidoreductase(deaminating)(flavin-containing)	[c] : 3hxkynam + o2 --> 48dhoxquin + h2o2 + nh4	0	1	0	1	0	1	0	1	0	1
1213	5HOXINOXDA	5-Hydroxytryptamine:oxygen oxidoreductase(deaminating)(flavin-containing)	[c] : h2o + o2 + srtn --> 5hoxindact + h2o2 + nh4	0	1	0	1	0	1	0	1	0	1
1214	TRYPTAOX	Tryptamine:oxygen oxidoreductase(deaminating)(flavin-containing)	[c] : h2o + o2 + trypta --> h2o2 + id3acald + nh4	0	1	0	1	0	1	0	1	0	1
1215	5HOXINDACTOX	5-Hydroxyindoleacetaldehyde:NAD+ oxidoreductase	[c] : 5hoxindact + h2o + nad --> 5hoxindoa + (2) h + nadh	0	1	0	1	0	1	0	1	0	1
1216	5HOXINDACTOXm	5-Hydroxyindoleacetaldehyde:NAD+ oxidoreductase (mito)	[m] : 5hoxindact + h2o + nad --> 5hoxindoa + (2) h + nadh	0	1	0	1	0	1	0	1	0	1
1217	ACOAHi	acetyl-CoA hydrolase	[c] : accoa + h2o --> ac + coa + h	0	1	0	1	0	1	0	1	0	1
1218	5HOXINDACTO2OX	5-Hydroxyindoleacetaldehyde:oxygen oxidoreductase	[c] : 5hoxindact + h2o + o2 --> 5hoxindoa + h + h2o2	0	1	0	1	0	1	0	1	0	1
1219	ACSOMT	S-Adenosyl-L-methionine:N-acetylserotonin O-methyltransferase	[c] : 5hoxindoa + amet --> 5moxact + ahcys + h	0	1	0	1	0	1	0	1	0	1
1220	ACSRTNMT	S-Adenosyl-L-homocysteine:N-acetylserotonin O-methyltransferase	[c] : Nacsertn + amet --> ahcys + h + melatn	0	1	0	1	0	1	0	1	0	1
1221	SRTNACT	Acetyl-CoA:aralkylamine N-acetyltransferase	[c] : accoa + srtn --> Nacsertn + coa + h	0	1	0	1	0	1	0	1	0	1
1222	MELATNOX	Melatonin:NADP oxidoreductase	[c] : h + melatn + nadph + o2 --> 6hoxmelatn + h2o + nadp	0	1	0	1	0	1	0	1	0	1
1223	MELATN23DOX	Melatonin:oxygen 2,3-dioxygenase (indole-decyclizing)	[c] : melatn + o2 --> fna5moxam	0	1	0	1	0	1	0	1	0	1
1224	5HTRPDOX	5-Hydroxy-L-tryptophan:oxygen 2,3-dioxygenase (indole-decyclizing)	[c] : 5htrp + o2 --> 5hoxnfkyn	0	1	0	1	0	1	0	1	0	1
1225	SRTN23OX	5-Hydroxytryptamine:oxygen 2,3-dioxygenase (indole-decyclizing)	[c] : o2 + srtn --> f5hoxkyn	0	1	0	1	0	1	0	1	0	1
1226	SRTNMTX	S-Adenosyl-L-methionine:amine N-methyltransferase (srtn)	[c] : amet + srtn --> ahcys + h + nmthsrtn	0	1	0	1	0	1	0	1	0	1
1227	LALDD	D-lactaldehyde dehydrogenase	[c] : lald-D + nadp <==> h + mthgxl + nadph	2.64361	0.99093	4.10539	0.999008	5.6608	0.998983	6.70156	0.872994	7.08575	1
1228	LALDO	D-Lactaldehyde:NAD+ oxidoreductase (glutathione-formylating)	[c] : gthrd + lald-D + nad <==> h + lgt-S + nadh	-0.174113	1	-0.276239	1	-0.443669	1	-0.66516	1	-0.502246	1
1229	LALDO2	D-Lactaldehyde:NADP+ 1-oxidoreductase	[c] : h + mthgxl + nadph --> lald-D + nadp	0.0873947	1	0.182628	1	0.19558	1	0.131738	1	0.0435198	1
1230	G5SDym	glutamate-5-semialdehyde dehydrogenase (m)	[m] : glu5p + h + nadph --> glu5sa + nadp + pi	0.105478	0.107625	0.133863	0.570507	0.14958	0.290325	0.152303	1	0.15262	1
1231	GLU5Km	glutamate 5-kinase (m)	[m] : atp + glu-L --> adp + glu5p	0.105478	0.107625	0.133863	0.570507	0.14958	0.290325	0.152303	1	0.15262	1
1232	PPDOy	Propane-1,2-diol:NADP+ 1-oxidoreductase	[c] : h + lald-D + nadph --> 12ppd-R + nadp	0.112524	1	0.146451	1	0.126981	1	0.13318	1	0.127359	1
1233	F1PGT	fucose-1-phosphate guanylyltransferase	[c] : fuc1p-L + gtp + h <==> gdpfuc + ppi	0	1	0	1	0	1	0	1	0	1
1234	FK	Fucokinase	[c] : atp + fuc-L --> adp + fuc1p-L + h	0	1	0	1	0	1	0	1	0	1
1235	GLYATm	glycine C-acetyltransferase	[m] : accoa + gly <==> 2aobut + coa	0	1	0	1	0	1	0	1	0	1
1236	KHK	ketohexokinase	[c] : atp + fru --> adp + f1p + h	0.556568	0.725386	2.43355	0.873404	4.70279	0.898527	7.39732	0.975936	10.0268	1
1237	HSD3B7	hydroxy-delta-5-steroid dehydrogenase, 3 beta- and steroid delta-isomerase 7	[r] : nad + xol7a --> h + nadh + xol7aone	0	1	0	1	0	1	0	1	0	1
1238	HSD3B7P	hydroxy-delta-5-steroid dehydrogenase, 3 beta- and steroid delta-isomerase 7	[r] : nadp + xol7a --> h + nadph + xol7aone	0	1	0	1	0	1	0	1	0	1
1239	AKR1D	aldo-keto reductase family 1, member D1 (delta 4-3-ketosteroid-5-beta-reductase)	[c] : h + nadph + xol7aone --> nadp + xol7ah	0	1	0	1	0	1	0	1	0	1
1240	AKR1D2	aldo-keto reductase family 1, member D1 (delta 4-3-ketosteroid-5-beta-reductase)	[c] : h + nadph + xoldiolone --> nadp + xoldioloneh	0	1	0	1	0	1	0	1	0	1
1241	AKR1C41	aldo-keto reductase family 1, member C4 (chlordecone reductase; 3-alpha hydroxysteroid dehydrogenase, type I; dihydrodiol dehydrogenase 4)	[c] : h + nadh + xol7ah --> nad + xol7ah2	0	1	0	1	0	1	0	1	0	1
1242	AKR1C42	aldo-keto reductase family 1, member C4 (chlordecone reductase; 3-alpha hydroxysteroid dehydrogenase, type I; dihydrodiol dehydrogenase 4)	[c] : h + nadh + xoldioloneh --> nad + xoltriol	0	1	0	1	0	1	0	1	0	1
1243	P45027A11m	5-beta-cholestane-3-alpha,7-alpha,12-alpha-triol 27-hydroxylase	[m] : h + nadph + o2 + xoltriol --> h2o + nadp + xoltetrol	0	1	0	1	0	1	0	1	0	1
1244	P45027A12m	5-beta-cholestane-3-alpha,7-alpha,12-alpha-triol 27-hydroxylase	[m] : nadp + xoltetrol --> h + nadph + thcholst	0	1	0	1	0	1	0	1	0	1
1245	AMACRp	alpha-methylacyl-CoA racemase	[x] : cholcoar --> cholcoas	0	1	0	1	0	1	0	1	0	1
1246	AMACRr	alpha-methylacyl-CoA racemase	[r] : cholcoar --> cholcoas	0	1	0	1	0	1	0	1	0	1
1247	HSD17B4x	hydroxysteroid (17-beta) dehydrogenase 4	[x] : cholcoads + h + nadph + o2 --> cholcoaone + h2o + nadp	0	1	0	1	0	1	0	1	0	1
1248	ADPRDPm	ADPribose diphosphatase (mitochondrial)	[m] : adprib + h2o --> amp + (2) h + r5p	0	1	0	1	0	1	0	1	0	1
1249	ADPGLC	ADPglucose diphosphatase	[c] : adpglc + h2o --> amp + g1p + (2) h	0	1	0	1	0	1	0	1	0	1
1250	ADPMAN	ADPmannose diphosphatase	[c] : adpman + h2o --> amp + (2) h + man1p	0	1	0	1	0	1	0	1	0	1
1251	SCPx	peroxisomal thiolase 2	[x] : cholcoaone + coa --> cholcoa + ppcoa	0	1	0	1	0	1	0	1	0	1
1252	P4508B11r	sterol 12-alpha-hydroxylase	[r] : h + nadph + o2 + xol7aone --> h2o + nadp + xoldiolone	0	1	0	1	0	1	0	1	0	1
1253	P4508B13r	sterol 12-alpha-hydroxylase (nadh)	[r] : h + nadh + o2 + xol7aone --> h2o + nad + xoldiolone	0	1	0	1	0	1	0	1	0	1
1254	ACOX2x	acyl-Coenzyme A oxidase 2, branched chain	[x] : cholcoas + fadh2 + o2 --> cholcoads + fad + (2) h2o	0	1	0	1	0	1	0	1	0	1
1255	ARGNm	arginase (m)	[m] : arg-L + h2o --> orn + urea	0	1	0	1	0	1	0	1	0	1
1256	HMGCOASim	Hydroxymethylglutaryl CoA synthase (ir)	[m] : aacoa + accoa + h2o --> coa + h + hmgcoa	0.235023	0.379899	0.287869	0.297057	0.204273	0.192351	0.0948957	0.974857	0.055527	0.627228
1257	ORNTArm	ornithine transaminase reversible (m)	[m] : akg + orn <==> glu-L + glu5sa	-0.0803336	0.107625	-0.101952	0.570507	-0.113923	0.290325	-0.115996	1	-0.116238	1
1258	GLYAMDTRc	glycine amidinotransferase (c)	[c] : arg-L + gly <==> gudac + orn	0	1	0	1	0	1	0	1	0	1
1259	GACMTRc	guanidinoacetate N-methyltransferase (c)	[c] : amet + gudac <==> ahcys + creat + h	0	1	0	1	0	1	0	1	0	1
1260	CKc	ATP Creatine kinase (c)	[c] : atp + creat <==> adp + pcreat	-0.205139	1	-0.117544	1	-0.146444	1	-0.170201	1	-0.0974166	1
1261	SARDHm	Sarcosine dehydrogenase (m)	[m] : fad + sarcs + thf --> fadh2 + gly + mlthf	0.0116484	0.107625	0.0147831	0.570507	0.0164831	0.313871	0.0167767	1	0.0168543	1
1262	ACACT1x	acetyl-CoA C-acetyltransferase, mitochondrial	[x] : (2) accoa --> aacoa + coa	0	1	0	1	0	1	0	1	0	1
1263	HMGLx	hydroxymethylglutaryl-CoA lyase	[x] : hmgcoa --> acac + accoa	0.235023	0.379899	0.287869	0.297057	0.204273	0.192351	0.0948957	0.974857	0.055527	0.627228
1264	HMGCOARr	Hydroxymethylglutaryl CoA reductase (ir)	[r] : (2) h + hmgcoa + (2) nadph --> coa + mev-R + (2) nadp	0	1	0	1	0	1	0	1	0	1
1265	HMGCOARx	Hydroxymethylglutaryl CoA reductase (ir)	[x] : (2) h + hmgcoa + (2) nadph --> coa + mev-R + (2) nadp	0	1	0	1	0	1	0	1	0	1
1266	MEVK1x	mevalonate kinase (atp)	[x] : atp + mev-R --> 5pmev + adp + h	0	1	0	1	0	1	0	1	0	1
1267	PMEVKx	phosphomevalonate kinase	[x] : 5pmev + atp --> 5dpmev + adp	0	1	0	1	0	1	0	1	0	1
1268	DPMVDx	diphosphomevalonate decarboxylase	[x] : 5dpmev + atp --> adp + co2 + ipdp + pi	0	1	0	1	0	1	0	1	0	1
1269	IPDDIx	isopentenyl-diphosphate D-isomerase	[x] : ipdp <==> dmpp	0	1	0	1	0	1	0	1	0	1
1270	NTPP9	Nucleoside triphosphate pyrophosphorylase (itp)	[c] : h2o + itp --> h + imp + ppi	0	1	0	1	0	1	0	1	0	1
1271	GRTTx	geranyltranstransferase	[x] : grdp + ipdp --> frdp + ppi	0	1	0	1	0	1	0	1	0	1
1272	DMATTx	dimethylallyltranstransferase	[x] : dmpp + ipdp --> grdp + ppi	0	1	0	1	0	1	0	1	0	1
1273	SQLSr	Squalene synthase	[r] : (2) frdp + h + nadph --> nadp + (2) ppi + sql	0	1	0	1	0	1	0	1	0	1
1274	NTPP10	Nucleoside triphosphate pyrophosphorylase (ditp)	[c] : ditp + h2o --> dimp + h + ppi	0	1	0	1	0	1	0	1	0	1
1275	NTPP11	Nucleoside triphosphate pyrophosphorylase (xtp)	[c] : h2o + xtp --> h + ppi + xmp	0	1	0	1	0	1	0	1	0	1
1276	LNSTLSr	lanosterol synthase	[r] : Ssq23epx --> lanost	0	1	0	1	0	1	0	1	0	1
1277	LNS14DMr	cytochrome P450 lanosterol 14-alpha-demethylase	[r] : (2) h + lanost + (3) nadph + (3) o2 --> 44mctr + for + (4) h2o + (3) nadp	0	1	0	1	0	1	0	1	0	1
1278	C14STRr	C-14 sterol reductase	[r] : 44mctr + h + nadph --> 44mzym + nadp	0	1	0	1	0	1	0	1	0	1
1279	C4STMO1r	C-4 sterol methyl oxidase (4,4-dimethylzymosterol)	[r] : 44mzym + (3) h + (3) nadph + (3) o2 --> 4mzym_int1 + (4) h2o + (3) nadp	0	1	0	1	0	1	0	1	0	1
1280	C3STDH1r	C-3 sterol dehydrogenase (4-methylzymosterol)	[r] : 4mzym_int1 + nad --> 4mzym_int2 + co2 + h + nadh	0	1	0	1	0	1	0	1	0	1
1281	C4STMO2r	C-4 methyl sterol oxidase	[r] : 4mzym_int2 + nad + o2 --> co2 + h + nadh + zym_int2	0	1	0	1	0	1	0	1	0	1
1282	C3STKR2r	C-3 sterol keto reductase (zymosterol)	[r] : h + nadph + zym_int2 --> nadp + zymst	0	1	0	1	0	1	0	1	0	1
1283	NBAHH_ir	Nalpha-(beta-alanyl)-L-histidine hydrolase IR	[c] : carn + h2o --> ala-B + his-L	0	1	0	1	0	1	0	1	0	1
1284	BAMPPALDOXm	beta-Aminopropion aldehyde:NAD+ oxidoreductase (m)	[m] : bamppald + h2o + nad --> ala-B + (2) h + nadh	0	1	0	1	0	1	0	1	0	1
1285	BAMPPALDOX	beta-Aminopropion aldehyde:NAD+ oxidoreductase	[c] : bamppald + h2o + nad --> ala-B + (2) h + nadh	0	1	0	1	0	1	0	1	0	1
1286	EBP1r	3-beta-hydroxysteroid-delta(8),delta(7)-isomerase	[r] : zymst --> chlstol	0	1	0	1	0	1	0	1	0	1
1287	EBP2r	3-beta-hydroxysteroid-delta(8),delta(7)-isomerase	[r] : zymstnl --> lthstrl	0	1	0	1	0	1	0	1	0	1
1288	LSTO1r	Lathosterol oxidase	[r] : chlstol + h + nadph + o2 --> ddsmsterol + (2) h2o + nadp	0	1	0	1	0	1	0	1	0	1
1289	LSTO2r	Lathosterol oxidase	[r] : h + lthstrl + nadph + o2 --> 7dhchsterol + (2) h2o + nadp	0	1	0	1	0	1	0	1	0	1
1290	DHCR71r	7-dehydrocholesterol reductase	[r] : ddsmsterol + h + nadph --> dsmsterol + nadp	0	1	0	1	0	1	0	1	0	1
1291	DHCR72r	7-dehydrocholesterol reductase	[r] : 7dhchsterol + h + nadph --> chsterol + nadp	0	1	0	1	0	1	0	1	0	1
1292	DHCR241r	24-dehydrocholesterol reductase [Precursor]	[r] : fadh2 + zymst --> fad + zymstnl	0	1	0	1	0	1	0	1	0	1
1293	DHCR242r	24-dehydrocholesterol reductase [Precursor]	[r] : chlstol + fadh2 --> fad + lthstrl	0	1	0	1	0	1	0	1	0	1
1294	DHCR243r	24-dehydrocholesterol reductase [Precursor]	[r] : dsmsterol + fadh2 --> chsterol + fad	0	1	0	1	0	1	0	1	0	1
1295	UPPN	b-ureidopropionase	[c] : cala + (2) h + h2o --> ala-B + co2 + nh4	0	1	0	1	0	1	0	1	0	1
1296	3HPCOAHYD	3-hydroxyisobutyryl-Coenzyme A hydrolase	[c] : 3hpcoa + h2o --> 3hpp + coa + h	0	1	0	1	0	1	0	1	0	1
1297	PRPNCOAHYDx	Propenoyl-CoA hydrolase (x)	[x] : h2o + prpncoa --> 3hpcoa	0	1	0	1	0	1	0	1	0	1
1298	PRPNCOAHYDm	Propenoyl-CoA hydrolase (m)	[m] : h2o + prpncoa --> 3hpcoa	0	1	0	1	0	1	0	1	0	1
1299	NDPK10	nucleoside-diphosphate kinase (ATP:dIDP)	[c] : atp + didp <==> adp + ditp	0	1	0	1	0	1	0	1	0	1
1300	NDPK1n	nucleoside-diphosphate kinase (ATP:GDP), nuclear	[n] : atp + gdp <==> adp + gtp	0	1	0	1	0	1	0	1	0	1
1301	NDPK2n	nucleoside-diphosphate kinase (ATP:UDP), nuclear	[n] : atp + udp <==> adp + utp	0	1	0	1	0	1	0	1	0	1
1302	NDPK3n	nucleoside-diphosphate kinase (ATP:CDP),nuclear	[n] : atp + cdp <==> adp + ctp	0	1	0	1	0	1	0	1	0	1
1303	NDPK2m	nucleoside-diphosphate kinase (ATP:UDP), mitochondrial	[m] : atp + udp <==> adp + utp	0	1	0	1	0	1	0	1	0	1
1304	NDPK1m	nucleoside-diphosphate kinase (ATP:GDP), mitochondrial	[m] : atp + gdp <==> adp + gtp	0	1	0	1	-8.00158e-05	1	-0.00069427	1	-0.00228018	1
1305	NDPK10n	nucleoside-diphosphate kinase (ATP:dIDP), nuclear	[n] : atp + didp <==> adp + ditp	0	1	0	1	0	1	0	1	0	1
1306	NDPK10m	nucleoside-diphosphate kinase (ATP:dIDP), mitochondrial	[m] : atp + didp <==> adp + ditp	0	1	0	1	0	1	0	1	0	1
1307	NDPK3m	nucleoside-diphosphate kinase (ATP:CDP), mitochondrial	[m] : atp + cdp <==> adp + ctp	0	1	0	1	0	1	0	1	0	1
1308	NDPK4n	nucleoside-diphosphate kinase (ATP:dTDP), nuclear	[n] : atp + dtdp <==> adp + dttp	0	1	0	1	0	1	0	1	0	1
1309	NDPK4m	nucleoside-diphosphate kinase (ATP:dTDP), mitochondrial	[m] : atp + dtdp <==> adp + dttp	0	1	0	1	0	1	0	1	0	1
1310	NDPK5n	nucleoside-diphosphate kinase (ATP:dGDP), nuclear	[n] : atp + dgdp <==> adp + dgtp	0	1	0	1	0	1	0	1	0	1
1311	NDPK5m	nucleoside-diphosphate kinase (ATP:dGDP), mitochondrial	[m] : atp + dgdp <==> adp + dgtp	0	1	0	1	0	1	0	1	0	1
1312	NDPK6n	nucleoside-diphosphate kinase (ATP:dUDP), nuclear	[n] : atp + dudp <==> adp + dutp	0	1	0	1	0	1	0	1	0	1
1313	NDPK6m	nucleoside-diphosphate kinase (ATP:dUDP), mitochondrial	[m] : atp + dudp <==> adp + dutp	0	1	0	1	0	1	0	1	0	1
1314	NDPK7n	nucleoside-diphosphate kinase (ATP:dCDP), nuclear	[n] : atp + dcdp <==> adp + dctp	0	1	0	1	0	1	0	1	0	1
1315	NDPK7m	nucleoside-diphosphate kinase (ATP:dCDP), mitochondrial	[m] : atp + dcdp <==> adp + dctp	0	1	0	1	0	1	0	1	0	1
1316	NDPK8n	nucleoside-diphosphate kinase (ATP:dADP), nuclear	[n] : atp + dadp <==> adp + datp	0	1	0	1	0	1	0	1	0	1
1317	NDPK8m	nucleoside-diphosphate kinase (ATP:dADP), mitochondrial	[m] : atp + dadp <==> adp + datp	0	1	0	1	0	1	0	1	0	1
1318	NDPK9n	nucleoside-diphosphate kinase (ATP:IDP), nuclear	[n] : atp + idp <==> adp + itp	0	1	0	1	0	1	0	1	0	1
1319	NDPK9m	nucleoside-diphosphate kinase (ATP:IDP), mitochondrial	[m] : atp + idp <==> adp + itp	0	1	0	1	0	1	0	1	0	1
1320	XANDp	xanthine dehydrogenase, peroxisomal	[x] : h2o + nad + xan --> h + nadh + urate	0	1	0	1	0	1	0	1	0	1
1321	DCK1n	Deoxycytidine kinase, nuclear (ATP)	[n] : atp + dcyt <==> adp + dcmp + h	0	1	0	1	0	1	0	1	0	1
1322	DCK2n	Deoxycytidine kinase, nuclear (UTP)	[n] : dcyt + utp <==> dcmp + h + udp	0	1	0	1	0	1	0	1	0	1
1323	CHOLD2m	choline dehydrogenase (FAD acceptor), mitochondrial	[m] : chol + fad --> betald + fadh2	0	1	0	1	0	1	0	1	0	1
1324	BHMT	betaine-homocysteine S-methyltransferase	[c] : glyb + hcys-L --> dmgly + met-L	0	1	0	1	0	1	0	1	0	1
1325	3SALACBOXL	3-Sulfino-L-alanine carboxy-lyase	[c] : 3sala + h --> co2 + hyptaur	0	1	0	1	0	1	0	1	0	1
1326	LCYSTCBOXL	3-Sulfoalanine carboxy-lyase	[c] : Lcyst + h --> co2 + taur	0	1	0	1	0	1	0	1	0	1
1327	GNMT	glycine N-methyltransferase	[c] : amet + gly --> ahcys + h + sarcs	0.0116484	0.107625	0.0147831	0.570507	0.0165186	0.290325	0.0168192	1	0.0168543	1
1328	UAG4E	UDP-N-acetylglucosamine 4-epimerase	[c] : uacgam <==> udpacgal	0	1	0	1	0	1	0	1	0	1
1329	P45017A2r	Cytochrome P450 17A1	[r] : 17ahprgnlone + h + nadph + (0.5) o2 --> acald + dhea + h2o + nadp	0	1	0	1	0	1	0	1	0	1
1330	P45017A1r	Cytochrome P450 17A1	[r] : h + nadph + o2 + prgnlone --> 17ahprgnlone + h2o + nadp	0	1	0	1	0	1	0	1	0	1
1331	HSD3B11	3 beta-hydroxysteroid dehydrogenase/delta 5-->4-isomerase type I	[c] : nad + prgnlone --> h + nadh + prgstrn	0	1	0	1	0	1	0	1	0	1
1332	HSD3B13	3 beta-hydroxysteroid dehydrogenase/delta 5-->4-isomerase type I	[c] : 17ahprgnlone + nad --> 17ahprgstrn + h + nadh	0	1	0	1	0	1	0	1	0	1
1333	LACZly	b-galactosidase,lysosomal	[l] : h2o + lcts --> gal + glc-D	0	1	0	1	0	1	0	1	0	1
1334	UGALGTg	UDPgalactose:D-glucose 4-beta-D-galactosyltransferase, Golgi apparatus	[g] : glc-D + udpgal --> h + lcts + udp	0	1	0	1	0	1	0	1	0	1
1335	P45011B11m	Steroid 11-beta-hydroxylase	[m] : 11docrtstrn + h + nadph + o2 --> crtstrn + h2o + nadp	0	1	0	1	0	1	0	1	0	1
1336	P45011B12m	Steroid 11-beta-hydroxylase	[m] : 11docrtsl + h + nadph + o2 --> crtsl + h2o + nadp	0	1	0	1	0	1	0	1	0	1
1337	P45021A2r	Steroid 21-hydroxylase	[r] : 17ahprgstrn + h + nadph + o2 --> 11docrtsl + h2o + nadp	0	1	0	1	0	1	0	1	0	1
1338	P45021A1r	Steroid 21-hydroxylase	[r] : h + nadph + o2 + prgstrn --> 11docrtstrn + h2o + nadp	0	1	0	1	0	1	0	1	0	1
1339	GALOR	D-Galactose:NADP+ 1-oxidoreductase	[c] : gal + h + nadph <==> galt + nadp	0	1	0	1	0	1	0	1	0	1
1340	SARCOXp	sarcosine oxidase, peroxisomal	[x] : h2o + o2 + sarcs --> fald + gly + h2o2	0	1	0	1	0	1	0	1	0	1
1341	LPCOXp	L-pipecolate oxidase, peroxisomal	[x] : Lpipecol + o2 --> h + h2o2 + thp2c	0	1	0	1	0	1	0	1	0	1
1342	P45017A3r	Cytochrome P450 17A1	[r] : h + nadph + o2 + prgstrn --> 17ahprgstrn + h2o + nadp	0	1	0	1	0	1	0	1	0	1
1343	P45017A4r	Cytochrome P450 17A1	[r] : 17ahprgstrn + h + nadph + (0.5) o2 --> acald + andrstndn + h2o + nadp	0	1	0	1	0	1	0	1	0	1
1344	HSD17B1	testicular 17-beta-hydroxysteroid dehydrogenase	[c] : estrone + h + nadph <==> estradiol + nadp	0	1	0	1	-0.00440889	1	-0.0274648	1	-0.000239358	1
1345	P45011B21m	Steroid 11-beta-hydroxylase	[m] : 11docrtstrn + h + nadph + (2) o2 --> aldstrn + (2) h2o + nadp	0	1	0	1	0	1	0	1	0	1
1346	EPCTX	ethanolamine-phosphate cytidylyltransferase	[c] : 2ameph + ctp + h --> cmp2amep + ppi	0	1	0	1	0	1	0	1	0	1
1347	PDE1g	3',5'-cyclic-nucleotide phosphodiesterase,Golgi	[g] : camp + h2o --> amp + h	0	1	0	1	0	1	0	1	0	1
1348	PDE4g	3',5'-cyclic-nucleotide phosphodiesterase, Golgi	[g] : 35cgmp + h2o --> gmp + h	0	1	0	1	0	1	0	1	0	1
1349	CPCTDTX	choline-phosphate cytidylyltransferase	[c] : ctp + h + ntm2amep --> cmpntm2amep + ppi	0	1	0	1	0	1	0	1	0	1
1350	P45019A1r	aromatase	[r] : andrstndn + nadph + (2) o2 --> estrone + for + (2) h2o + nadp	0	1	0	1	0	1	0	1	0	1
1351	P45019A2r	aromatase	[r] : nadph + (2) o2 + tststerone --> estradiol + for + (2) h2o + nadp	0	1	0	1	0	1	0	1	0	1
1352	SR5ARr	3-oxo-5-alpha-steroid 4-dehydrogenase	[r] : h + nadph + tststerone --> 5adtststerone + nadp	0	1	0	1	0	1	0	1	0	1
1353	HSD17B3r	testicular 17-beta-hydroxysteroid dehydrogenase	[r] : andrstndn + h + nadph --> nadp + tststerone	0	1	0	1	0	1	0	1	0	1
1354	HSD3B11r	3 beta-hydroxysteroid dehydrogenase/delta 5-->4-isomerase type I	[r] : nad + prgnlone --> h + nadh + prgstrn	0	1	0	1	0	1	0	1	0	1
1355	HSD3B12r	3 beta-hydroxysteroid dehydrogenase/delta 5-->4-isomerase type I	[r] : dhea + nad --> andrstndn + h + nadh	0	1	0	1	0	1	0	1	0	1
1356	HSD3B13r	3 beta-hydroxysteroid dehydrogenase/delta 5-->4-isomerase type I	[r] : 17ahprgnlone + nad --> 17ahprgstrn + h + nadh	0	1	0	1	0	1	0	1	0	1
1357	HSD17B7r	testicular 17-beta-hydroxysteroid dehydrogenase	[r] : estrone + h + nadph --> estradiol + nadp	0	1	0	1	0	1	0	1	0.000239358	1
1358	PGDIr	Prostaglandin-H2 D-isomerase [Precursor]	[r] : prostgh2 <==> prostgd2	0	1	0	1	0	1	0	1	0	1
1359	PGDI	Prostaglandin-H2 D-isomerase [Precursor]	[c] : prostgh2 <==> prostgd2	0	1	0	1	0	1	0	1	0	1
1360	PGESr	Prostaglandin E synthase	[r] : prostgh2 <==> prostge2	0	1	0	1	0	1	0	1	0	1
1361	MALTly	alpha-glucosidase, lysosomal	[l] : h2o + malt --> (2) glc-D	0	1	0	1	0	1	0	1	0	1
1362	MLTG1ly	Maltodextrin glucosidase (maltotriose), lysosome	[l] : h2o + malttr --> glc-D + malt	0	1	0	1	0	1	0	1	0	1
1363	PGISr	Prostaglandin I2 synthase	[r] : prostgh2 <==> prostgi2	0	1	0	1	0	1	0	1	0	1
1364	LTA4H	Leukotriene A-4 hydrolase	[c] : h2o + leuktrA4 --> leuktrB4	0	1	0	1	0	1	0	1	0	1
1365	GGT5r	Gamma-glutamyltransferase 5	[r] : h2o + leuktrC4 <==> glu-L + leuktrD4	0	1	0	1	0	1	0	1	0	1
1366	TXASr	Thromboxane-A synthase	[r] : prostgh2 --> txa2	0	1	0	1	0	1	0	1	0	1
1367	GLCter	glucose transport, endoplasmic reticulum	glc-D[c] <==> glc-D[r]	0	1	0	1	0	1	0	1	0	1
1368	PIter	phosphate transport, endoplasmic reticulum	pi[r] <==> pi[c]	0	1	0.000212549	1	0.00243795	1	0.00588839	1	0.0075929	1
1369	SELCYSTGL	selanocystathionine g-lyase	[c] : h2o + selcyst --> 2obut + nh4 + selcys	0	1	0	1	0	1	0	1	0	1
1370	SELCYSTS	selanocystathionine beta-synthase	[c] : selhcys + ser-L --> h2o + selcyst	0	1	0	1	0	1	0	1	0	1
1371	SEAHCYSHYD	Se-Adenosylselenohomocysteine hydrolase	[c] : h2o + seahcys --> adn + selhcys	0	1	0	1	0	1	0	1	0	1
1372	SELMETAT	selenomethionine adenosyltransferase	[c] : atp + h2o + selmeth --> pi + ppi + seasmet	0	1	0	1	0	1	0	1	0	1
1373	SELADT	selenate adenylyltransferase	[c] : atp + h + sel --> adsel + ppi	0	1	0	1	0	1	0	1	0	1
1374	ADSELK	adenylyl-selenate kinase	[c] : adsel + atp --> 3padsel + adp + h	0	1	0	1	0	1	0	1	0	1
1375	SELCYSLY	selenocysteine lyase	[c] : dtt + selcys --> ala-L + dttOX + h + seln	0	1	0	1	0	1	0	1	0	1
1376	AP4AH1	Ap4A hydrolase, asymmetrically	[c] : ap4a + h2o --> amp + atp + (2) h	0	1	0	1	0	1	0	1	0	1
1377	PPAer	inorganic diphosphatase, endoplasmic reticulum	[r] : h2o + ppi --> h + (2) pi	0	1	0.000106275	1	0.00121897	1	0.00294419	1	0.00379645	1
1378	ICDHyrm	Isocitrate dehydrogenase (NADP+)	[m] : icit + nadp <==> akg + co2 + nadph	-6.63703	0.773966	-7.82237	0.733547	-7.74731	0.81101	-5.78958	0.939355	-4.9455	0.719089
1379	G6PDH2rer	glucose 6-phosphate dehydrogenase, endoplasmic reticulum	[r] : g6p + nadp <==> 6pgl + h + nadph	0.00664247	1	0.0210076	1	0.0372046	1	0.0475532	1	0.0428158	1
1380	G6PDH1rer	glucose-6-phosphate dehydrogenase, endoplasmic reticulum	[r] : g6p + nad <==> 6pgl + h + nadh	-0.00664247	1	-0.0210076	1	-0.037251	1	-0.0476141	1	-0.0428158	1
1381	GLGNS1	glycogen synthase (ggn -> glygn1)	[c] : ggn + (3) udpg --> glygn1 + (3) h + (3) udp	0	1	0	1	0	1	0	1	0	1
1382	GLBRAN	1,4-alpha-glucan branching enzyme (glygn1 -> glygn2)	[c] : glygn1 --> glygn2	0	1	0	1	0	1	0	1	0	1
1383	GLPASE1	glycogen phosphorylase (glygn2 -> dxtrn)	[c] : glygn2 + (3) pi --> dxtrn + (3) g1p	0	1	0	1	0	1	0	1	0	1
1384	GLDBRAN	glycogen debranching enzyme	[c] : dxtrn + h2o --> glc-D + glygn3	0	1	0	1	0	1	0	1	0	1
1385	UDPGP	UDPglucose pyrophosphohydrolase	[c] : h2o + udpg --> g1p + (2) h + ump	0	1	0	1	0	1	0	1	0	1
1386	GUACYC	guanylate cyclase	[c] : gtp --> 35cgmp + ppi	0	1	0	1	0	1	0	1	0	1
1387	CYTK3	cytidylate kinase (CMP)(GTP)	[c] : cmp + gtp <==> cdp + gdp	-0.000299713	0.651644	-0.000697594	0.621878	-0.0019763	0.766424	-0.00585612	0.999769	-0.00671447	0.999999
1388	CYTK4	cytidylate kinase (dCMP)(GTP)	[c] : dcmp + gtp <==> dcdp + gdp	-6.50762e-05	0.742589	-0.000235326	0.725199	-0.00347449	0.869828	-0.00494984	1	-0.00488281	1
1389	GGNG	glycogenin self-glucosylation	[c] : Tyr-ggn + (8) udpg --> ggn + (8) h + (8) udp	0	1	0	1	0	1	0	1	0	1
1390	GLPASE2	glycogen phosphorylase (amyls -> glc-D)	[c] : glygn3 + (7) h2o --> Tyr-ggn + (7) glc-D	0	1	0	1	0	1	0	1	0	1
1391	DCYTDn	deoxycytidine deaminase, nuclear	[n] : dcyt + h + h2o --> duri + nh4	0	1	0	1	0	1	0	1	0	1
1392	CYTDn	cytidine deaminase, nuclear	[n] : cytd + h + h2o --> nh4 + uri	0	1	0	1	0	1	0	1	0	1
1393	DURIK1m	deoxyuridine kinase (ATP:Deoxyuridine), mitochondrial	[m] : atp + duri --> adp + dump + h	0	1	0	1	0	1	0	1	0	1
1394	DUTPDPn	dUTP diphosphatase, nuclear	[n] : dutp + h2o --> dump + h + ppi	0	1	0	1	0	1	0	1	0	1
1395	TRDR2	Thioredoxin (ubiquinone 10) reductase (NADPH)	[c] : h + nadph + q10 --> nadp + q10h2	0	1	0	1	0	1	0	1	0	1
1396	TRDR3	Thioredoxin (ubiquinone 10) reductase (NADH)	[c] : h + nadh + q10 --> nad + q10h2	0	1	0	1	0	1	0	1	0	1
1397	UDPGNP	UDPglucuronate uridine-diphosphohydrolase	[c] : h2o + udpglcur --> glcur + h + udp	0	1	0	1	0	1	0	1	0	1
1398	GULN3D	L-gulonate 3-dehydrogenase	[c] : guln + nad <==> 3dhguln + h + nadh	0	1	0	1	0	1	0	1	0	1
1399	DGULND	dehydro-L-gulonate decarboxylase	[c] : 3dhguln + h <==> co2 + xylu-L	0	1	0	1	0	1	0	1	0	1
1400	XYLUR	xylulose reductase	[c] : h + nadph + xylu-L <==> nadp + xylt	0	1	0	1	0	1	0	1	0	1
1401	XYLTD_Dr	xylitol dehydrogenase (D-xyulose-forming)	[c] : nad + xylt <==> h + nadh + xylu-D	0	1	0	1	0	1	0	1	0	1
1402	ABTD	L-arabinitol 4-dehydrogenase	[c] : abt + nad <==> h + nadh + xylu-L	0	1	0	1	0	1	0	1	0	1
1403	NOS1	Nitric Oxide Synthase (intermediate forming)	[c] : arg-L + h + nadph + o2 --> h2o + nadp + nwharg	0	1	0	1	0	1	0	1	0	1
1404	NOS2	Nitric Oxide Synthase (NO forming)	[c] : nadph + (2) nwharg + (2) o2 --> (2) citr-L + h + (2) h2o + nadp + (2) no	0	1	0	1	0	1	0	1	0	1
1405	PROD2m	Proline dehydrogenase (m)	[m] : fad + pro-L --> 1pyr5c + fadh2 + h	9.61489	0.347142	12.0671	0.826783	10.6629	0.999996	7.72009	0.252508	4.99117	0.79248
1406	PROAKGOX1r	L-Proline,2-oxoglutarate:oxygen oxidoreductase (4-hydroxylating) (ER)	[r] : akg + o2 + pro-L --> 4hpro-LT + co2 + succ	0	1	0	1	0	1	0	1	0	1
1407	GLACO	D-Glucuronolactone:NAD+ oxidoreductase	[c] : glac + (2) h2o + nad --> glcr + (3) h + nadh	0	1	0	1	0	1	0	1	0	1
1408	MCLOR	3-Mercaptolactate:NAD+ oxidoreductase	[c] : mercplac + nad <==> h + mercppyr + nadh	0	1	0	1	0	1	0	1	0	1
1409	GLACOm	D-Glucuronolactone:NAD+ oxidoreductase, mitochondrial	[m] : glac + (2) h2o + nad --> glcr + (3) h + nadh	0	1	0	1	0	1	0	1	0	1
1410	DNAMTn	DNA (cytosine-5-)-methyltransferase, nucleus	[n] : amet + dna --> ahcys + dna5mtc + h	0	1	0	1	0	1	0	1	0	1
1411	GULNDer	gulonate dehydrogenase, endoplasmic reticulum	[r] : glcur + h + nadph <==> guln + nadp	0	1	0	1	0	1	0	1	0	1
1412	GLNLASEer	gluconolactonase, endoplasmic reticulum	[r] : guln + h <==> gullac + h2o	0	1	0	1	0	1	0	1	0	1
1413	ASCBOX	ascorbic acid oxidase	[c] : ascb-L + (2) h + (2) o2s --> dhdascb + (2) h2o2	0.00344132	1	0.00206991	1	0.00184004	1	0.00101181	1	0.000960971	1
1414	GTHDH	Glutathione dehydrogenase (dehydroascorbate reductase)	[c] : dhdascb + (2) gthrd --> ascb-L + gthox	0.0020767	1	0.00124929	1	0.0011938	1	0.000649229	1	0.000654823	1
1415	DASCBR	dehydroascorbate reductase	[c] : dhdascb + h + nadph --> ascb-L + nadp	0.00136462	1	0.000820622	1	0.000646235	1	0.000362581	1	0.000306148	1
1416	DASCBH	L-Dehydroascorbate lactonohydrolase	[c] : dhdascb + h2o --> 23doguln + h	0	1	0	1	0	1	0	1	0	1
1417	DOGULND1	2,3-dioxo-L-gulonate decarboxylase (L-lyxonate-forming)	[c] : 23doguln + h2o --> co2 + lyxnt	0	1	0	1	0	1	0	1	0	1
1418	DOGULND2	2,3-dioxo-L-gulonate decarboxylase (L-xylonate-forming)	[c] : 23doguln + h2o --> co2 + xylnt	0	1	0	1	0	1	0	1	0	1
1419	ALOX15	Arachidonate 15-lipoxygenase	[c] : arachd + o2 --> 15HPET	0	1	0	1	0	1	0	1	0	1
1420	DOGULNO1	2,3-dioxo-L-gulonate:hydrogen peroxide oxireductase	[c] : 23doguln + h2o2 --> (2) h + oxa + thrnt	0	1	0	1	0	1	0	1	0	1
1421	DOGULNO2	2,3-dioxo-L-gulonate:hydrogen peroxide oxireductase	[c] : 23doguln + h2o --> eryth + h + oxa	0	1	0	1	0	1	0	1	0	1
1422	CYTK1n	cytidylate kinase (CMP),nuclear	[n] : atp + cmp <==> adp + cdp	0	1	0	1	0	1	0	1	0	1
1423	CYTK2n	cytidylate kinase (dCMP),nuclear	[n] : atp + dcmp <==> adp + dcdp	0	1	0	1	0	1	0	1	0	1
1424	UMPK2n	UMP kinase (CTP),nuclear	[n] : ctp + ump <==> cdp + udp	0	1	0	1	0	1	0	1	0	1
1425	UMPK2	UMP kinase (CTP)	[c] : ctp + ump <==> cdp + udp	0.000393134	1	0.000394555	1	0.000252867	1	0.00111461	0.82941	0.00096076	0.913975
1426	CYTK3n	cytidylate kinase (dCMP,CTP),nuclear	[n] : ctp + dcmp <==> cdp + dcdp	0	1	0	1	0	1	0	1	0	1
1427	UMPK3n	UMP kinase (UTP),nuclear	[n] : ump + utp <==> (2) udp	0	1	0	1	0	1	0	1	0	1
1428	UMPK3	UMP kinase (UTP)	[c] : ump + utp <==> (2) udp	-7.27884e-05	1	-0.000219417	1	9.91335e-05	1	0.000503309	0.999999	0.00112374	1
1429	UMPK4	UMP kinase (GTP)	[c] : gtp + ump <==> gdp + udp	5.95145e-05	1	-4.3621e-05	1	-0.00273516	0.999981	-0.00569783	1	-0.00604335	1
1430	UMPK4n	UMP kinase (GTP),nuclear	[n] : gtp + ump <==> gdp + udp	0	1	0	1	0	1	0	1	0	1
1431	UMPK5n	UMP kinase (dATP),nuclear	[n] : datp + ump <==> dadp + udp	0	1	0	1	0	1	0	1	0	1
1432	UMPK5	UMP kinase (dATP)	[c] : datp + ump <==> dadp + udp	7.91856e-05	0.999768	7.96935e-05	0.999824	0.000472309	0.999818	0.000544472	0.999995	0.000569127	0.986206
1433	UMPK6n	UMP kinase (dCTP),nuclear	[n] : dctp + ump <==> dcdp + udp	0	1	0	1	0	1	0	1	0	1
1434	UMPK6	UMP kinase (dCTP)	[c] : dctp + ump <==> dcdp + udp	8.8336e-05	0.945732	0.000232633	0.949578	0.000267546	0.963001	-7.65655e-05	1	-0.000155535	1
1435	UMPK7	UMP kinase (dGTP)	[c] : dgtp + ump <==> dgdp + udp	7.65918e-05	1	7.73811e-05	1	0.000213529	1	0.000456312	1	7.06058e-05	1
1436	UMPK7n	UMP kinase (dGTP),nuclear	[n] : dgtp + ump <==> dgdp + udp	0	1	0	1	0	1	0	1	0	1
1437	CYTK4n	cytidylate kinase (dCMP,GTP),nuclear	[n] : dcmp + gtp <==> dcdp + gdp	0	1	0	1	0	1	0	1	0	1
1438	CYTK5	cytidylate kinase (dCMP)	[c] : ctp + dcmp <==> cdp + dcdp	0.000154634	0.936283	0.000153133	0.906152	0.000352809	0.977967	0.000600044	1	0.000474195	0.999224
1439	GLYOp	glycine oxidase, perixosomal	[x] : gly + h2o + o2 --> glx + h2o2 + nh4	0	1	0	1	0	1	0	1	0	1
1440	CYTK5n	cytidylate kinase (CMP),nuclear	[n] : cmp + gtp <==> cdp + gdp	0	1	0	1	0	1	0	1	0	1
1441	CYTK6n	cytidylate kinase (CMP,CTP),nuclear	[n] : cmp + ctp <==> (2) cdp	0	1	0	1	0	1	0	1	0	1
1442	CYTK6	cytidylate kinase (CMP,CTP)	[c] : cmp + ctp <==> (2) cdp	5.96971e-05	0.999993	5.98861e-05	1	0.000143587	1	0.000401763	1	0.000634259	0.999996
1443	CYTK7	cytidylate kinase (CMP,UTP)	[c] : cmp + utp <==> cdp + udp	-0.000220753	0.999999	-4.77601e-05	0.999854	0.000132547	1	-0.000127023	1	-0.000238937	0.999994
1444	CYTK7n	cytidylate kinase (CMP,UTP),nuclear	[n] : cmp + utp <==> cdp + udp	0	1	0	1	0	1	0	1	0	1
1445	CYTK8	cytidylate kinase (CMP,dATP)	[c] : cmp + datp <==> cdp + dadp	-8.03119e-05	0.828896	-8.07782e-05	0.835787	6.13922e-05	0.775134	0.000642792	1	0.000783186	1
1446	CYTK8n	cytidylate kinase (CMP,dATP),nuclear	[n] : cmp + datp <==> cdp + dadp	0	1	0	1	0	1	0	1	0	1
1447	CYTK9	cytidylate kinase (CMP,dCTP)	[c] : cmp + dctp <==> cdp + dcdp	-9.39037e-05	1	-9.45686e-05	1	6.67697e-05	1	0.000290935	1	0.000935638	1
1448	CYTK9n	cytidylate kinase (CMP,dCTP),nuclear	[n] : cmp + dctp <==> cdp + dcdp	0	1	0	1	0	1	0	1	0	1
1449	CYTK10	cytidylate kinase (CMP,dGTP)	[c] : cmp + dgtp <==> cdp + dgdp	-8.15828e-05	1	-7.66633e-06	1	-0.000134002	1	0.000108073	1	0.000238063	1
1450	CYTK10n	cytidylate kinase (CMP,dGTP),nuclear	[n] : cmp + dgtp <==> cdp + dgdp	0	1	0	1	0	1	0	1	0	1
1451	CYTK11	cytidylate kinase (dCMP,dGTP)	[c] : dcmp + dgtp <==> dcdp + dgdp	1.34604e-06	1	6.13911e-07	1	0.000469472	1	0.000546156	1	0.00077585	1
1452	CYTK11n	cytidylate kinase (dCMP,dGTP),nuclear	[n] : dcmp + dgtp <==> dcdp + dgdp	0	1	0	1	0	1	0	1	0	1
1453	DPROOp	D-proline oxidase, perixosomal	[x] : o2 + pro-D --> 1p2cbxl + h + h2o2	0	1	0	1	0	1	0	1	0	1
1454	CYTK12	cytidylate kinase (dCMP,dCTP)	[c] : dcmp + dctp <==> (2) dcdp	-3.25476e-06	1	-1.00605e-06	1	0.000372299	1	0.000419975	1	0.0006054	1
1455	CYTK12n	cytidylate kinase (dCMP,dCTP),nuclear	[n] : dcmp + dctp <==> (2) dcdp	0	1	0	1	0	1	0	1	0	1
1456	CYTK13	cytidylate kinase (dCMP,dATP)	[c] : datp + dcmp <==> dadp + dcdp	4.10331e-06	1	4.02621e-06	1	-0.000160151	1	0.00011015	1	0.000151181	1
1457	CYTK13n	cytidylate kinase (dCMP,dATP),nuclear	[n] : datp + dcmp <==> dadp + dcdp	0	1	0	1	0	1	0	1	0	1
1458	CYTK14	cytidylate kinase (dCMP,UTP)	[c] : dcmp + utp <==> dcdp + udp	-0.000160376	0.999808	-0.000160442	0.999811	-5.19874e-06	0.996865	3.28174e-05	1	-0.000139307	1
1459	CYTK14n	cytidylate kinase (dCMP,CTP),nuclear	[n] : dcmp + utp <==> dcdp + udp	0	1	0	1	0	1	0	1	0	1
1460	GLRASE	glucuronolactone reductase	[c] : gullac + nadp <==> glac + h + nadph	0	1	0	1	0	1	0	1	0	1
1461	FACOAL1812	fatty-acid--CoA ligase	[c] : atp + coa + vacc <==> amp + ppi + vacccoa	0	1	0	1	0	1	0	1	0	1
1462	FACOAL1813	fatty-acid--CoA ligase	[c] : atp + coa + elaid <==> amp + od2coa + ppi	0	1	0	1	0	1	0	1	0	1
1463	UROLACer	uronolactonase, endoplasmic reticulum	[r] : glcur + h <==> glac + h2o	0	1	0	1	0	1	0	1	0	1
1464	FACOAL1822	fatty-acid--CoA ligase	[c] : atp + coa + lneldc <==> amp + lneldccoa + ppi	0	1	0	1	0	1	0	1	0	1
1465	FACOAL200	fatty-acid--CoA ligase	[c] : arach + atp + coa <==> amp + arachcoa + ppi	0	1	0	1	0	1	0	1	0	1
1466	FACOAL224	fatty-acid--CoA ligase	[c] : adrn + atp + coa <==> adrncoa + amp + ppi	0	1	0	1	0	1	0	1	0	1
1467	FACOAL241	fatty-acid--CoA ligase	[c] : atp + coa + nrvnc <==> amp + nrvnccoa + ppi	0	1	0	1	0	1	0	1	0	1
1468	FACOAL260	fatty-acid--CoA ligase (n-C26:0)	[c] : atp + coa + hexc <==> amp + hexccoa + ppi	0	1	0	1	0	1	0	1	0	1
1469	FACOAL2251	fatty-acid--CoA ligase	[c] : atp + coa + dcsptn1 <==> amp + dcsptn1coa + ppi	0	1	0	1	0	1	0	1	0	1
1470	FACOAL2252	fatty-acid--CoA ligase	[c] : atp + clpnd + coa <==> amp + clpndcoa + ppi	0	1	0	1	0	1	0	1	0	1
1471	FACOAL240	fatty-acid--CoA ligase	[c] : atp + coa + lgnc <==> amp + lgnccoa + ppi	0	1	0	1	0	1	0	1	0	1
1472	FACOAL203	fatty-acid--CoA ligase	[c] : atp + coa + dlnlcg <==> amp + dlnlcgcoa + ppi	0	1	0	1	0	1	0	1	0	1
1473	FACOAL205	fatty-acid--CoA ligase	[c] : atp + coa + tmndnc <==> amp + ppi + tmndnccoa	0	1	0	1	0	1	0	1	0	1
1474	FACOAL184	fatty-acid--CoA ligase	[c] : atp + coa + strdnc <==> amp + ppi + strdnccoa	0	1	0	1	0	1	0	1	0	1
1475	FACOAL1831	fatty-acid--CoA ligase	[c] : atp + coa + lnlncg <==> amp + lnlncgcoa + ppi	0	1	0	1	0	1	0	1	0	1
1476	FACOAL1832	fatty-acid--CoA ligase	[c] : atp + coa + lnlnca <==> amp + lnlncacoa + ppi	0	1	0	1	0	1	0	1	0	1
1477	ACOAD8m	acyl-CoA dehydrogenase (isovaleryl-CoA), mitochondrial	[m] : fad + ivcoa --> 3mb2coa + fadh2	0	1	0	1	0	1	0	1	0	1
1478	DESAT16_2	palmitoyl-CoA desaturase (n-C16:0CoA -> n-C16:1CoA)	[c] : h + nadh + o2 + pmtcoa --> (2) h2o + hdcoa + nad	9.01145	0.800253	11.4067	0.946773	10.7341	0.934194	8.59964	0.725282	5.46258	0.507666
1479	DESAT18_3	stearoyl-CoA desaturase (n-C18:0CoA -> n-C18:1CoA)	[c] : h + nadh + o2 + stcoa --> (2) h2o + nad + odecoa	0	1	0	1	0	1	0	1	0	1
1480	DESAT18_4	stearoyl-CoA desaturase (n-C18:0CoA -> n-C18:1CoA)	[c] : h + nadh + o2 + stcoa --> (2) h2o + nad + vacccoa	0	1	0	1	0	1	0	1	0	1
1481	DESAT18_5	stearoyl-CoA desaturase (n-C18:0CoA -> n-C18:1CoA)	[c] : h + nadh + o2 + stcoa --> (2) h2o + nad + od2coa	0	1	0	1	0	1	0	1	0	1
1482	DESAT18_6	fatty acyl-CoA desaturase (n-C18:1CoA -> n-C18:2CoA)	[c] : h + nadh + o2 + odecoa --> (2) h2o + lneldccoa + nad	0	1	0	1	0	1	0	1	0	1
1483	DESAT18_7	fatty acyl-CoA desaturase (n-C18:1CoA -> n-C18:2CoA)	[c] : h + nadh + o2 + vacccoa --> (2) h2o + lneldccoa + nad	0	1	0	1	0	1	0	1	0	1
1484	DESAT18_8	fatty acyl-CoA desaturase (n-C18:1CoA -> n-C18:2CoA)	[c] : h + nadh + o2 + od2coa --> (2) h2o + lneldccoa + nad	0	1	0	1	0	1	0	1	0	1
1485	DESAT18_10	fatty acyl-CoA desaturase (n-C18:2CoA -> n-C18:3CoA)	[c] : h + lnlncacoa + nadh + o2 --> (2) h2o + nad + strdnccoa	0	1	0	1	0	1	0	1	0	1
1486	DESAT18_9	fatty acyl-CoA desaturase (n-C18:2CoA -> n-C18:3CoA)	[c] : h + lnlccoa + nadh + o2 --> (2) h2o + lnlncgcoa + nad	0	1	0	1	0	1	0	1	0	1
1487	DESAT20_1	fatty acyl-CoA desaturase (n-C20:3CoA -> n-C20:4CoA)	[c] : dlnlcgcoa + h + nadh + o2 --> arachdcoa + (2) h2o + nad	0	1	0	1	0	1	0	1	0	1
1488	FACOAL204	fatty-acid--CoA ligase	[c] : arachd + atp + coa <==> amp + arachdcoa + ppi	0	1	0	1	0	1	0	1	0	1
1489	FACOAL2042	fatty-acid--CoA ligase	[c] : atp + coa + eicostet <==> amp + eicostetcoa + ppi	0	1	0	1	0	1	0	1	0	1
1490	DESAT20_2	fatty acyl-CoA desaturase (n-C20:4CoA -> n-C20:5CoA)	[c] : eicostetcoa + h + nadh + o2 --> (2) h2o + nad + tmndnccoa	0	1	0	1	0	1	0	1	0	1
1491	FACOAL245_1	fatty-acid--CoA ligase	[c] : atp + coa + tetpent6 <==> amp + ppi + tetpent6coa	0	1	0	1	0	1	0	1	0	1
1492	FACOAL245_2	fatty-acid--CoA ligase	[c] : atp + coa + tetpent3 <==> amp + ppi + tetpent3coa	0	1	0	1	0	1	0	1	0	1
1493	FACOAL244_1	fatty-acid--CoA ligase	[c] : atp + coa + tettet6 <==> amp + ppi + tettet6coa	0	1	0	1	0	1	0	1	0	1
1494	FACOAL246_1	fatty-acid--CoA ligase	[c] : atp + coa + tethex3 <==> amp + ppi + tethex3coa	0	1	0	1	0	1	0	1	0	1
1495	DESAT22_1p	fatty acyl-CoA desaturase (n-C22:4CoA -> n-C22:5CoA)	[x] : adrncoa + h + nadh + o2 --> dcsptn1coa + (2) h2o + nad	0	1	0	1	0	1	0	1	0	1
1496	NTD1m	5'-nucleotidase (dUMP),mitochondrial	[m] : dump + h2o --> duri + pi	0	1	0	1	0	1	0	1	0	1
1497	NTD5m	5'-nucleotidase (dTMP), mitochondrial	[m] : dtmp + h2o --> pi + thymd	0	1	0	1	0	1	0	1	0	1
1498	NTD2m	5'-nucleotidase (UMP), mitochondrial	[m] : h2o + ump --> pi + uri	0	1	0	1	0	1	0	1	0	1
1499	HIBDm	3-hydroxyisobutyrate dehydrogenase, mitochondrial	[m] : 3hmp + nad <==> 2mop + h + nadh	0.00346399	1	0.00414685	1	0.00479262	1	0.00167603	1	0.00443048	1
1500	NTD12	5'-nucleotidase (dIMP)	[c] : dimp + h2o --> din + pi	0	1	0	1	0	1	0	1	0	1
1501	MCCCrm	methylcrotonoyl-CoA carboxylase, mitochondrial	[m] : 3mb2coa + atp + hco3 <==> 3mgcoa + adp + h + pi	0	1	0	1	0	1	0	1	0	1
1502	ACOAD1fm	acyl-CoA dehydrogenase (butanoyl-CoA), mitochondrial	[m] : btcoa + fad --> b2coa + fadh2	0	1	0	1	0	1	0	1	0	1
1503	PPAP	phosphatidic acid phosphatase	[c] : h2o + pa_hs --> dag_hs + pi	0	1	0	1	0	1	0	1	0	1
1504	GLXO1	glyoxylate oxidase	[c] : glx + h2o + nad --> (2) h + nadh + oxa	0	1	0	1	0	1	0	1	0	1
1505	GLYCTO1p	Glycolate oxidase, peroxisome	[x] : glyclt + o2 --> glx + h2o2	0.0195285	1	0.0410071	1	0.0331977	1	0.0358138	1	0	1
1506	BTND1	biotinidase (biotin)	[c] : biocyt + h2o --> btn + lys-L	0	1	0	1	0	1	0	1	0	1
1507	BACCLm	biotin-[acetyl-CoA-carboxylase] ligase, mitochondrial	[m] : atp + btn + h --> btamp + ppi	0	1	0	1	0	1	0	1	0	1
1508	HPYRR2x	hydroxypyruvate reductase (NADH)	[c] : h + hpyr + nadh --> glyc-S + nad	0	1	0	1	0	1	0	1	0	1
1509	NNMT	Nicotinamide N-methyltransferase	[c] : amet + ncam --> 1mncam + ahcys	0	1	0	1	0	1	0	1	0	1
1510	NMNATr	nicotinamide-nucleotide adenylyltransferase	[c] : atp + h + nmn <==> nad + ppi	0	1	0	1	-0.000179192	1	-0.000182679	1	-0.000262291	1
1511	HPYRDC	hydroxypyruvate decarboxylase	[c] : h + hpyr --> co2 + gcald	0	1	0	1	0	1	0	1	0	1
1512	GCALDDm	Glycolaldehyde dehydrogenase, mitochondrial	[m] : gcald + h2o + nad --> glyclt + (2) h + nadh	0	1	0	1	0	1	0	1	0	1
1513	MTHFD2m	methylenetetrahydrofolate dehydrogenase (NAD), mitochondrial	[m] : mlthf + nad <==> methf + nadh	-0.367878	0.994696	4.23241	0.9905	9.09334	0.928661	9.63044	0.466915	7.52635	0.546184
1514	MTHFD2	methylenetetrahydrofolate dehydrogenase (NAD)	[c] : mlthf + nad <==> methf + nadh	2.95716	0.689029	6.37369	0.757662	7.12403	0.913749	4.92024	0.809832	2.8685	0.904941
1515	13DAMPPOX	1,3-Diaminopropane:oxygen oxidoreductase (deaminating)	[c] : 13dampp + h2o + o2 --> bamppald + h2o2 + nh4	0	1	0	1	0	1	0	1	0	1
1516	HISTASE	Histaminase	[c] : h2o + hista + o2 --> h2o2 + im4act + nh4	0	1	0	1	0	1	0	1	0	1
1517	CEPTC	choline phosphotransferase	[c] : cdpchol + dag_hs --> cmp + h + pchol_hs	0	1	0	1	0	1	0	1	0	1
1518	CEPTE	ethanolamine phosphotransferase	[c] : cdpea + dag_hs --> cmp + h + pe_hs	0	1	0	1	0	1	0	1	0	1
1519	PSSA2_hs	Phosphatidylserine synthase homo sapiens	[c] : pe_hs + ser-L <==> etha + ps_hs	0	1	0	1	0	1	0	1	0	1
1520	PSSA1_hs	Phosphatidylserine synthase homo sapiens	[c] : pchol_hs + ser-L <==> chol + ps_hs	0	1	0	1	0	1	0	1	0	1
1521	TYRDOPO	Tyrosine:dopa oxidase	[c] : o2 + (2) tyr-L --> (2) 34dhphe	0	1	0	1	0	1	0	1	0	1
1522	TYRDOPO3	Tyrosine:dopa oxidase (dopaquinone producing 2)	[c] : (2) 34dhphe + o2 --> (2) dopaqn + (2) h2o	0	1	0	1	0	1	0	1	0	1
1523	DOPAQNISO1	Dopaquinone isomerase 1	[c] : dopaqn <==> 2c23dh56dhoxin + h	0	1	0	1	0	1	0	1	0	1
1524	DOPACHRMISO	L-dopachrome isomerase 1	[c] : (2) 2c23dh56dhoxin + o2 --> (2) L-dpchrm + (2) h2o	0	1	0	1	0	1	0	1	0	1
1525	CDS	phosphatidate cytidylyltransferase	[c] : ctp + h + pa_hs --> cdpdag_hs + ppi	0	1	0	1	0	1	0	1	0	1
1526	CDSm	phosphatidate cytidylyltransferase	[m] : ctp + h + pa_hs --> cdpdag_hs + ppi	0	1	0	1	0	1	0	1	0	1
1527	ACGAM6PSi	N-acetylglucosamine-6-phosphate synthase	[c] : accoa + gam6p --> acgam6p + coa + h	0	1	0	1	0	1	0	1	0	1
1528	UAG2EMAi	UDP-N-acetyl-D-glucosamine 2-epimerase (Hydrolysis)	[c] : h2o + uacgam --> acmana + h + udp	0	1	0	1	0	1	0	1	0	1
1529	ACNAM9PL	N-Acetylneuraminate 9-phosphate pyruvate-lyase (pyruvate-phosphorylating)	[c] : acmanap + h2o + pep --> acnamp + pi	0	1	0	1	0	1	0	1	0	1
1530	ACNAM9PL2	N-Acetylneuraminate 9-phosphate pyruvate-lyase (pyruvate-phosphorylating)	[c] : h2o + man6p + pep --> kdnp + pi	0	1	0	1	0	1	0	1	0	1
1531	PTRCOX1	Putrescine:oxygen oxidoreductase (deaminating)	[c] : h2o + o2 + ptrc --> 4abutn + h2o2 + nh4	0	1	0	1	0	1	0	1	0	1
1532	ACNMLr	N-Acetylneuraminate lyase (reversible)	[c] : acnam <==> acmana + pyr	0	1	0	1	0	1	0	1	0	1
1533	CMPSAS	CMP sialic acid synthase	[c] : acnam + ctp --> cmpacna + ppi	0	1	0	1	0	1	0	1	0	1
1534	CMPSASn	CMP sialic acid synthase, nuclear	[n] : acnam + ctp --> cmpacna + ppi	0	1	0	1	0	1	0	1	0	1
1535	NABTNOm	N4-Acetylaminobutanal:NAD+ oxidoreductase (m)	[m] : h2o + n4abutn + nad --> 4aabutn + (2) h + nadh	0	1	0	1	0	1	0	1	0	1
1536	PTRCAT1	Putrescine acetyltransferase	[c] : accoa + ptrc --> aprut + coa + h	0	1	0	1	0	1	0	1	0	1
1537	ACGAM2E	N-acetylglucosamine 2-epimerase	[c] : acgam <==> acmana	0	1	0	1	0	1	0	1	0	1
1538	ACNAMPH	N-Acetylneuraminate 9-phosphate phosphohydrolase	[c] : acnamp + h2o --> acnam + pi	0	1	0	1	0	1	0	1	0	1
1539	KDNH	2-keto-3deoxy-D-glycero-D-galactononic acid phosphohydrolase	[c] : h2o + kdnp --> kdn + pi	0	1	0	1	0	1	0	1	0	1
1540	ACGALK	N-acetylgalactosamine kinase	[c] : acgal + atp --> acgal1p + adp + h	0	1	0	1	0	1	0	1	0	1
1541	ACGALK2	N-acetylgalactosamine kinase (ITP)	[c] : acgal + itp --> acgal1p + h + idp	0	1	0	1	0	1	0	1	0	1
1542	UAGALDP	UDP-N-acetylgalactosamine diphosphorylase	[c] : acgal1p + h + utp --> ppi + udpacgal	0	1	0	1	0	1	0	1	0	1
1543	2HBO	2-Hydroxybutyrate:NAD+ oxidoreductase	[c] : 2hb + nad <==> 2obut + h + nadh	-0.0116484	0.107625	-0.0147831	0.570507	-0.0164476	0.338701	-0.171643	1	-0.0162751	0.993058
1544	PPCOAOm	Propanoyl-CoA:FAD 2,3-oxidoreductase, mitochondrial	[m] : fad + ppcoa --> fadh2 + prpncoa	0	1	0	1	0	1	0	1	0	1
1545	3HPPD	3-hydroxypropionate dehydrogenase	[c] : 3hpp + nad <==> h + msa + nadh	0	1	0	1	0	1	0	1	0	1
1546	AACOAT	Acetoacetyl-CoA:acetate CoA-transferase	[c] : acac + atp + coa <==> aacoa + amp + ppi	-0.117511	0.379899	-0.144783	0.254697	-0.124635	0.0319512	-0.0940591	0.747783	-0.0814909	0.200473
1547	ADCim	Acetoacetate decarboxylation (irreversible), mitochondrial	[m] : acac + h --> acetone + co2	0.505282	1	0.335824	1	0.134372	1	0.0178051	1	0.00785762	1
1548	PI4P5K	phosphatidylinositol 4-phosphate 5-kinase	[c] : atp + pail4p_hs --> adp + h + pail45p_hs	0	1	0	1	0	1	0	1	0	1
1549	PIK4	phosphatidylinositol 4-kinase	[c] : atp + pail_hs --> adp + h + pail4p_hs	0	1	0	1	0	1	0	1	0	1
1550	FACOAL40im	fatty-acid--CoA ligase (butanoate), mitochondrial	[m] : atp + but + coa --> amp + btcoa + ppi	0	1	0	1	0	1	0	1	0	1
1551	3HBCDm	3-hydroxybutyryl-CoA dehydratase, mitochondrial	[m] : b2coa + h2o <==> 3hbcoa-R	0	1	0	1	0	1	0	1	0	1
1552	AGPSx	alkylglycerone phosphate synthase	[x] : adhap_hs + alkylR1oh --> Rtotal + akdhap_hs + h	0	1	0	1	0	1	0	1	0	1
1553	AGPex	alkyl glycerol phosphate transport	akdhap_hs[c] <==> akdhap_hs[x]	0	1	0	1	0	1	0	1	0	1
1554	AGLPR	alkyl glycerol phosphate reductase	[c] : akdhap_hs + h + nadph --> akgp_hs + nadp	0	1	0	1	0	1	0	1	0	1
1555	AGLPT	alkyl glycerol phosphate acyltransferase	[c] : Rtotal2 + akgp_hs + h --> ak2gp_hs + h2o	0	1	0	1	0	1	0	1	0	1
1556	AGLPH	alkyl glycerol phosphate hydrolase	[c] : ak2gp_hs + h2o --> ak2g_hs + pi	0	1	0	1	0	1	0	1	0	1
1557	AGLPED	alkyl acyl glycerophosphoethanolamine desaturase	[c] : ak2gpe_hs + h + nadph + o2 --> dak2gpe_hs + (2) h2o + nadp	0	1	0	1	0	1	0	1	0	1
1558	AGLPC	alkyl acylglycerol phosphocholine transferase	[c] : ak2g_hs + cdpchol --> ak2gchol_hs + cmp + h + h2o	0	1	0	1	0	1	0	1	0	1
1559	PLA2	phospholipase A2	[c] : ak2gchol_hs + h2o --> Rtotal2 + ak2lgchol_hs + h	0	1	0	1	0	1	0	1	0	1
1560	PAFS	alkyl glycerol phosphocholine acetyl transferase	[c] : accoa + ak2lgchol_hs --> coa + paf_hs	0	1	0	1	0	1	0	1	0	1
1561	MECOALm	mesaconate--CoA ligase (ADP-forming), mitochondrial	[m] : atp + coa + mescon <==> adp + mescoa + pi	0	1	0	1	0	1	0	1	-0.000275208	1
1562	MECOAS1m	mesaconate--CoA ligase (GDP-forming)	[m] : coa + gtp + mescon <==> gdp + mescoa + pi	0	1	0	1	0	1	0	1	0.000275208	1
1563	CITMCOAHm	L-Citramalyl-CoA hydro-lyase, mitochondrial	[m] : h2o + itaccoa <==> citmcoa-L	0	1	0	1	0	1	0	1	0	1
1564	CITMCOALm	L-Citramalyl-CoA pyruvate-lyase	[m] : citmcoa-L --> accoa + pyr	0	1	0	1	0	1	0	1	0	1
1565	MGACONm	methylglutaconase, mitochondrial	[m] : citmcoa-L <==> h2o + mescoa	0	1	0	1	0	1	0	1	0	1
1566	MESCOALm	Mesaconyl-CoA pyruvate-lyase	[m] : h2o + mescoa --> accoa + pyr	0	1	0	1	0	1	0	1	0	1
1567	MMSAD3m	methylmalonate-semialdehyde dehydrogenase (malonic semialdehyde), mitochondrial	[m] : coa + msa + nad --> accoa + co2 + nadh	0	1	0	1	0	1	0	1	0	1
1568	PLA2_2	phospholipase A2	[c] : h2o + pchol_hs --> Rtotal2 + h + lpchol_hs	0	1	0	1	0	1	0	1	0	1
1569	LPASE	lysophospholipase	[c] : h2o + lpchol_hs --> Rtotal + g3pc + h	0	1	0	1	0	1	0	1	0	1
1570	PGPPT	phosphatidyl-CMP: glycerophosphate phosphatidyltransferase	[c] : cdpdag_hs + glyc3p --> cmp + h + pgp_hs	0	1	0	1	0	1	0	1	0	1
1571	PGPP_hs	Phosphatidylglycerol phosphate phosphatase (homo sapiens)	[c] : h2o + pgp_hs --> pglyc_hs + pi	0	1	0	1	0	1	0	1	0	1
1572	CLS_hs	cardiolipin synthase (homo sapiens)	[c] : cdpdag_hs + pglyc_hs --> clpn_hs + cmp + h	0	1	0	1	0	1	0	1	0	1
1573	PI45P5P	phosphatidylinositol-4,5-bisphosphate 5-phosphatase	[c] : h2o + pail45p_hs --> pail4p_hs + pi	0	1	0	1	0	1	0	1	0	1
1574	DARGOp	D-arginine oxidase, perixosomal	[x] : arg-D + h2o + o2 --> 5g2oxpt + h2o2 + nh4	0	1	0	1	0	1	0	1	0	1
1575	DORNOp	D-ornithine oxidase, perixosomal	[x] : h2o + o2 + orn-D --> 5a2opntn + h2o2 + nh4	0	1	0	1	0	1	0	1	0	1
1576	LFORKYNHYD	L-Formylkynurenine hydrolase	[c] : Lfmkynr + h2o --> ala-L + h + nformanth	0	1	0	1	0	1	0	1	0	1
1577	SSALxm	succinate-semialdehyde dehydrogenase (NAD) reversible (mitochondrial)	[m] : h2o + nad + sucsal --> (2) h + nadh + succ	0	1	0	1	0	1	0	1	0.00021111	1
1578	AMPTASECG	alanyl aminopeptidase (cys-gly)	[c] : cgly + h2o --> cys-L + gly	0	1	0	1	0	1	0	1	0	1
1579	OPAHir	5-Oxoproline amidohydrolase (ATP-hydrolysing) (ir)	[c] : 5oxpro + atp + (2) h2o --> adp + glu-L + h + pi	0	1	0	1	0	1	0	1	0	1
1580	PI45P3K	phosphatidylinositol 4,5-bisphosphate 3-kinase	[c] : atp + pail45p_hs --> adp + h + pail345p_hs	0	1	0	1	0	1	0	1	0	1
1581	SACCD3m	saccharopine dehydrogenase (NADP, L-lysine forming), mitochondrial	[m] : akg + h + lys-L + nadph --> h2o + nadp + saccrp-L	0	1	0	1	0.0018606	1	0.00391668	1	0.00509265	1
1582	SACCD4m	saccharopine dehydrogenase (NAD, L-glutamate forming), mitochondrial	[m] : h2o + nadp + saccrp-L --> L2aadp6sa + glu-L + h + nadph	0	1	0	1	0.0018606	1	0.00391668	1	0.00509265	1
1583	AASAD3	L-aminoadipate-semialdehyde dehydrogenase (NADH)	[c] : L2aadp6sa + h2o + nad --> L2aadp + (2) h + nadh	0	1	0	1	0	1	0	1	0	1
1584	AATAi	2-aminoadipate transaminase, irreversible	[c] : L2aadp + akg --> 2oxoadp + glu-L	0	1	0	1	0.0018606	1	0.00391668	1	0.00509265	1
1585	PI345P3P	phosphatidylinositol-3,4,5-trisphosphate 3-phosphatase	[c] : h2o + pail345p_hs --> pail45p_hs + pi	0	1	0	1	0	1	0	1	0	1
1586	PI5P4K	phosphatidylinositol-5-phosphate 4-kinase	[c] : atp + pail5p_hs --> adp + h + pail45p_hs	0	1	0	1	0	1	0	1	0	1
1587	DHCRD1	dihydroceramide desaturase	[c] : dhcrm_hs + nadp --> crm_hs + h + nadph	0	1	0	1	0	1	0	1	0	1
1588	DHCRD2	dihydroceramide desaturase	[c] : dhcrm_hs + fad --> crm_hs + fadh2	0	1	0	1	0	1	0	1	0	1
1589	AAPSAS	AAPSAS	[c] : h + h2o + thp2c --> L2aadp6sa	0	1	0	1	0	1	0	1	0	1
1590	DAGK_hs	Diacylglycerol phosphate kinase (homo sapiens)	[c] : atp + dag_hs <==> adp + h + pa_hs	-0.0927184	1	-0.0873022	1	-0.0518156	1	-0.102197	1	-0.225721	1
1591	DAGKn_hs	Diacylglycerol phosphate kinase (homo sapiens)	[n] : atp + dag_hs <==> adp + h + pa_hs	0	1	0	1	0	1	0	1	0	1
1592	OIVD1m	2-oxoisovalerate dehydrogenase (acylating; 4-methyl-2-oxopentaoate), mitochondrial	[m] : 4mop + coa + nad --> co2 + ivcoa + nadh	0	1	0	1	0	1	0	1	0	1
1593	OIVD2m	2-oxoisovalerate dehydrogenase (acylating; 3-methyl-2-oxobutanoate), mitochondrial	[m] : 3mob + coa + nad --> co2 + ibcoa + nadh	0.00346399	1	0.00414685	1	0.00479262	1	0.00167603	1	0.00443048	1
1594	OIVD3m	2-oxoisovalerate dehydrogenase (acylating; 3-methyl-2-oxopentanoate), mitochondrial	[m] : 3mop + coa + nad --> 2mbcoa + co2 + nadh	0	1	0	1	0	1	0	1	0	1
1595	MGCHrm	methylglutaconyl-CoA hydratase (reversible), mitochondrial	[m] : 3mgcoa + h2o <==> hmgcoa	0	1	0	1	0	1	0	1	0	1
1596	ECOAH12m	3-hydroxyacyl-CoA dehydratase (3-hydroxyisobutyryl-CoA) (mitochondria)	[m] : 2mp2coa + h2o <==> 3hibutcoa	0.00346399	1	0.00414685	1	0.00479262	1	0.00167603	1	0.00443048	1
1597	3HBCOAHLm	3-hydroxyisobutyryl-CoA hydrolase, mitochondrial	[m] : 3hibutcoa + h2o --> 3hmp + coa + h	0.00346399	1	0.00414685	1	0.00479262	1	0.00167603	1	0.00443048	1
1598	ACOAD10m	acyl-CoA dehydrogenase (2-methylbutanoyl-CoA), mitochondrial	[m] : 2mbcoa + fad --> 2mb2coa + fadh2	0	1	0	1	0	1	0	1	0	1
1599	ACOAD9m	acyl-CoA dehydrogenase (isobutyryl-CoA), mitochondrial	[m] : fad + ibcoa --> 2mp2coa + fadh2	0.00346399	1	0.00414685	1	0.00479262	1	0.00167603	1	0.00443048	1
1600	ECOAH9m	2-Methylprop-2-enoyl-CoA (2-Methylbut-2-enoyl-CoA), mitochondrial	[m] : 2mb2coa + h2o <==> 3hmbcoa	0	1	0	1	0	1	0	1	0	1
1601	HACD9m	3-hydroxyacyl-CoA dehydrogenase (2-Methylacetoacetyl-CoA), mitochondrial	[m] : 3hmbcoa + nad <==> 2maacoa + h + nadh	0	1	0	1	0	1	0	1	0	1
1602	ACACT10m	acetyl-CoA C-acetyltransferase, mitochondrial	[m] : 2maacoa + coa <==> accoa + ppcoa	0	1	0	1	0	1	0	1	0	1
1603	INOSTO	inositol oxygenase	[c] : inost + o2 --> glcur + h + h2o	0	1	0	1	0	1	0	1	0	1
1604	PI4PP	phosphatidylinositol-4-phosphate 4-phosphatase	[c] : h2o + pail4p_hs --> pail_hs + pi	0	1	0	1	0	1	0	1	0	1
1605	MI3PP	myo-inositol 3-phosphatase	[c] : h2o + mi3p-D --> inost + pi	0	1	0	1	0	1	0	1	0	1
1606	MI4PP	myo-inositol 4-phosphatase	[c] : h2o + mi4p-D --> inost + pi	0	1	0	1	0	1	0	1	0	1
1607	MI14PP	inositol-1,4-bisphosphate 1-phosphatase	[c] : h2o + mi14p --> mi4p-D + pi	0	1	0	1	0	1	0	1	0	1
1608	MI34PP	inositol-3,4-bisphosphate 4-phosphatase	[c] : h2o + mi34p --> mi3p-D + pi	0	1	0	1	0	1	0	1	0	1
1609	MI13PP	inositol-1,3-bisphosphate 3-phosphatase	[c] : h2o + mi13p --> mi1p-D + pi	0	1	0	1	0	1	0	1	0	1
1610	MI134PP	inositol-1,3,4-trisphosphate 1-phosphatase	[c] : h2o + mi134p --> mi34p + pi	0	1	0	1	0	1	0	1	0	1
1611	MI145PP	inositol-1,4,5-trisphosphate 5-phosphatase	[c] : h2o + mi145p --> mi14p + pi	0	1	0	1	0	1	0	1	0	1
1612	MI1345PP	inositol-1,3,4,5-trisphosphate 5-phosphatase	[c] : h2o + mi1345p --> mi134p + pi	0	1	0	1	0	1	0	1	0	1
1613	MI145PK	inositol-1,4,5-trisphosphate 3-kinase	[c] : atp + mi145p --> adp + h + mi1345p	0	1	0	1	0	1	0	1	0	1
1614	MI134PK	inositol-1,3,4-trisphosphate 6-kinase	[c] : atp + mi134p --> adp + h + mi1346p	0	1	0	1	0	1	0	1	0	1
1615	MI3456PK	inositol-3,4,5,6-tetrakisphosphate 1-kinase	[c] : atp + mi3456p --> adp + h + mi13456p	0	1	0	1	0	1	0	1	0	1
1616	MI13456PK	inositol-1,3,4,5,6-pentakisphosphate 2-kinase	[c] : atp + mi13456p --> adp + h + minohp	0	1	0	1	0	1	0	1	0	1
1617	CDIPTr	phosphatidylinositol synthase (Homo sapiens)	[c] : cdpdag_hs + inost <==> cmp + h + pail_hs	0	1	0	1	0	1	0	1	0	1
1618	PYDXDH	pyridoxal dehydrogenase	[c] : h2o + o2 + pydx --> 4pyrdx + h2o2	0	1	0	1	0	1	0	1	0	1
1619	BBHOX	4-Trimethylammoniobutanoate,2-oxoglutarate:oxygen oxidoreductase (3-hydroxylating)	[c] : 4tmeabutn + akg + o2 --> co2 + crn + succ	0	1	0	1	0	1	0	1	0	1
1620	TMLYSOX	trimethyllysine dioxygenase	[c] : akg + o2 + tmlys --> 3htmelys + co2 + succ	0	1	0	1	0	1	0	1	0	1
1621	TMABADH	4-trimethylaminobutyraldehyde dehydrogenase	[c] : 4tmeabut + h2o + nad --> 4tmeabutn + (2) h + nadh	0	1	0	1	0	1	0	1	0	1
1622	MI1346PKn	inositol-1,3,4,6-tetrakisphosphate 5-kinase, nucleus	[n] : atp + mi1346p --> adp + h + mi13456p	0	1	0	1	0	1	0	1	0	1
1623	MI145P6Kn	inositol-1,4,5-triphosphate 6-kinase, nucleus	[n] : atp + mi145p --> adp + h + mi1456p	0	1	0	1	0	1	0	1	0	1
1624	MI145PKn	inositol-1,4,5-trisphosphate 3-kinase, nucleus	[n] : atp + mi145p --> adp + h + mi1345p	0	1	0	1	0	1	0	1	0	1
1625	MI1345PKn	inositol-1,3,4,5-triphosphate 6-kinase, nucleus	[n] : atp + mi1345p --> adp + h + mi13456p	0	1	0	1	0	1	0	1	0	1
1626	MI1456PKn	inositol-1,4,5,6- tetrakisphosphate 3-kinase, nucleus	[n] : atp + mi1456p --> adp + h + mi13456p	0	1	0	1	0	1	0	1	0	1
1627	PMI12346PH	5-diphosphoinositol-1,2,3,4,6-pentakisphosphate diphosphohydrolase	[c] : h2o + ppmi12346p --> h + minohp + pi	0	1	0	1	0	1	0	1	0	1
1628	PMI1346PH	diphosphoinositol-1,3,4,6-tetrakisphosphate diphosphohydrolase	[c] : h2o + ppmi1346p --> h + mi13456p + pi	0	1	0	1	0	1	0	1	0	1
1629	PMI1346PHn	diphosphoinositol-1,3,4,6-tetrakisphosphate diphosphohydrolase, nucleus	[n] : h2o + ppmi1346p --> h + mi13456p + pi	0	1	0	1	0	1	0	1	0	1
1630	PMI12346PHn	5-diphosphoinositol-1,2,3,4,6-pentakisphosphate diphosphohydrolase, nuclear	[n] : h2o + ppmi12346p --> h + minohp + pi	0	1	0	1	0	1	0	1	0	1
1631	PIK3	phosphatidylinositol 3-kinase	[c] : atp + pail_hs --> adp + h + pail3p_hs	0	1	0	1	0	1	0	1	0	1
1632	PI4P3K	phosphatidylinositol 4-phosphate 3-kinase	[c] : atp + pail4p_hs --> adp + h + pail34p_hs	0	1	0	1	0	1	0	1	0	1
1633	PI4P3Ker	phosphatidylinositol 4-phosphate 3-kinase, endoplasmic reticulum	[r] : atp + pail4p_hs --> adp + h + pail34p_hs	0	1	0	1	0	1	0	1	0	1
1634	PIK3er	phosphatidylinositol 3-kinase, endoplasmic reticulum	[r] : atp + pail_hs --> adp + h + pail3p_hs	0	1	0	1	0	1	0	1	0	1
1635	OBDHc	2-Oxobutanoate dehydrogenase, cytosolic	[c] : 2obut + coa + nad --> co2 + nadh + ppcoa	0	1	0	1	7.09485e-05	1	0.000361154	1	0.000579174	1
1636	PI45PLC	phosphatidylinositol 4,5-bisphosphate phospholipase C	[c] : h2o + pail45p_hs --> dag_hs + h + mi145p	0	1	0	1	0	1	0	1	0	1
1637	PIPLC	phosphatidylinositol phospholipase C	[c] : h2o + pail_hs --> dag_hs + h + mi1p-D	0	1	0	1	0	1	0	1	0	1
1638	HYPTROX	Hypotaurine oxidase	[c] : (2) h + (2) hyptaur + o2 --> (2) taur	0	1	0	1	0	1	0	1	0	1
1639	BCDO	beta-Carotene dioxygenase	[c] : caro + o2 --> (2) retinal	0	1	0	1	0	1	0	1	0	1
1640	RDH1	retinol dehydrogenase (all-trans)	[c] : nad + retinol <==> h + nadh + retinal	-2.85751	0.868671	-4.58673	0.581477	-6.3091	0.725831	-7.0946	0.979413	-9.08864	0.999951
1641	RDH2	retinol dehydrogenase (9-cis,NADH)	[c] : nad + retinol-9-cis <==> h + nadh + retinal-cis-9	-1.61057	0.999951	-2.72081	1	-3.66057	0.999776	-5.03387	0.998216	-5.81494	0.996866
1642	RDH3	retinol dehydrogenase (11-cis,NADH)	[c] : nad + retinol-cis-11 <==> h + nadh + retinal-11-cis	-2.69626	0.999949	-4.65129	0.999107	-6.34455	0.999782	-6.88642	1	-7.01104	0.999916
1643	RDH1a	retinol dehydrogenase (all-trans,NADPH)	[c] : nadp + retinol <==> h + nadph + retinal	2.6728	0.924332	4.27363	0.533569	5.83142	0.767234	6.60574	0.95014	8.39621	0.999762
1644	RDH2a	retinol dehydrogenase (9-cis,NADPH)	[c] : nadp + retinol-9-cis <==> h + nadph + retinal-cis-9	1.74279	1	2.93273	1	3.92269	0.999997	5.28683	0.999917	6.10516	0.999479
1645	RDH3a	retinol dehydrogenase (11-cis,NADPH)	[c] : nadp + retinol-cis-11 <==> h + nadph + retinal-11-cis	2.74875	0.999824	4.75247	0.998635	6.56281	0.998435	7.15561	0.999999	7.47954	0.999424
1646	PI4PLC	phosphatidylinositol 4-phosphate phospholipase C	[c] : h2o + pail4p_hs --> dag_hs + h + mi14p	0	1	0	1	0	1	0	1	0	1
1647	PIPLCn	phosphatidylinositol phospholipase C, nucleus	[n] : h2o + pail_hs --> dag_hs + h + mi1p-D	0	1	0	1	0	1	0	1	0	1
1648	PI4PLCn	phosphatidylinositol 4-phosphate phospholipase C, nucleus	[n] : h2o + pail4p_hs --> dag_hs + h + mi14p	0	1	0	1	0	1	0	1	0	1
1649	PI45PLCn	phosphatidylinositol 4,5-bisphosphate phospholipase C, nucleus	[n] : h2o + pail45p_hs --> dag_hs + h + mi145p	0	1	0	1	0	1	0	1	0	1
1650	PYAM5POr	pyridoxamine 5'-phosphate oxidase	[c] : h2o + o2 + pyam5p <==> h2o2 + nh4 + pydx5p	0	1	0	1	0	1	0	1	0	1
1651	LYSMTF1n	histone-lysine N-methyltransferase, nuclear	[n] : amet + peplys --> Nmelys + ahcys	0	1	0	1	0	1	0	1	0	1
1652	LYSMTF2n	histone-lysine N-methyltransferase, nuclear	[n] : Nmelys + amet --> Ndmelys + ahcys	0	1	0	1	0	1	0	1	0	1
1653	LYSMTF3n	histone-lysine N-methyltransferase, nuclear	[n] : Ndmelys + amet --> Ntmelys + ahcys	0	1	0	1	0	1	0	1	0	1
1654	PYLALDOX	Perillyl aldehyde:NAD+ oxidoreductase	[c] : h2o + nad + pylald --> (2) h + nadh + peracd	0	1	0	1	0	1	0	1	0	1
1655	PYLALDOXm	Perillyl aldehyde:NAD+ oxidoreductase (m)	[m] : h2o + nad + pylald --> (2) h + nadh + peracd	0	1	0	1	0	1	0	1	0	1
1656	C2M26DCOAHLm	cis-2-Methyl-5-isopropylhexa-2,5-dienoyl-CoA hydro-lyase (m)	[m] : c2m26dcoa + h2o <==> 3h26dm5coa	0	1	0	1	0	1	0	1	0	1
1657	T2M26DCOAHLm	trans-2-Methyl-5-isopropylhexa-2,5-dienoyl-CoA hydro-lyase (m)	[m] : h2o + t2m26dcoa <==> 3h26dm5coa	0	1	0	1	0	1	0	1	0	1
1658	MI134P4P	inositol-1,3,4-trisphosphate 4-phosphatase	[c] : h2o + mi134p --> mi13p + pi	0	1	0	1	0	1	0	1	0	1
1659	MI14P4P	inositol-1,4-bisphosphate 4-phosphatase	[c] : h2o + mi14p --> mi1p-D + pi	0	1	0	1	0	1	0	1	0	1
1660	PI3P4K	phosphatidylinositol 3-phosphate 4-kinase	[c] : atp + pail3p_hs --> adp + h + pail34p_hs	0	1	0	1	0	1	0	1	0	1
1661	PI34P5K	phosphatidylinositol 3,4-bisphosphate 5-kinase	[c] : atp + pail34p_hs --> adp + h + pail345p_hs	0	1	0	1	0	1	0	1	0	1
1662	PI345P5P	phosphatidylinositol-3,4,5-trisphosphate 5-phosphatase	[c] : h2o + pail345p_hs --> pail34p_hs + pi	0	1	0	1	0	1	0	1	0	1
1663	PIK5	phosphatidylinositol 5-kinase	[c] : atp + pail_hs --> adp + h + pail5p_hs	0	1	0	1	0	1	0	1	0	1
1664	PI5P3K	phosphatidylinositol-5-phosphate 3-kinase	[c] : atp + pail5p_hs --> adp + h + pail35p_hs	0	1	0	1	0	1	0	1	0	1
1665	PI3P5K	phosphatidylinositol 3-phosphate 5-kinase	[c] : atp + pail3p_hs --> adp + h + pail35p_hs	0	1	0	1	0	1	0	1	0	1
1666	C2M26DCOAHLx	cis-2-Methyl-5-isopropylhexa-2,5-dienoyl-CoA hydro-lyase (x)	[x] : c2m26dcoa + h2o <==> 3h26dm5coa	0	1	0	1	0	1	0	1	0	1
1667	T2M26DCOAHLx	trans-2-Methyl-5-isopropylhexa-2,5-dienoyl-CoA hydro-lyase (x)	[x] : h2o + t2m26dcoa <==> 3h26dm5coa	0	1	0	1	0	1	0	1	0	1
1668	PI5P3Ker	phosphatidylinositol-5-phosphate 3-kinase, endoplasmic reticulum	[r] : atp + pail5p_hs --> adp + h + pail35p_hs	0	1	0	1	0	1	0	1	0	1
1669	PI45P4P	phosphatidylinositol-4,5-bisphosphate 4-phosphatase	[c] : h2o + pail45p_hs --> pail5p_hs + pi	0	1	0	1	0	1	0	1	0	1
1670	T4HCINNOX	4-Coumarate:oxygen oxidoreductase	[c] : (2) T4hcinnm + o2 --> (2) 34dhcinm	0	1	0	1	0	1	0	1	0	1
1671	PIACGT	phosphatidylinositol N-acetylglucosaminyltransferase	[c] : pail_hs + uacgam --> acgpail_hs + h + udp	0	1	0	1	0	1	0	1	0	1
1672	BDG2HCGHD	beta-D-Glucosyl-2-coumarinate glucohydrolase	[c] : bdg2hc + h2o --> 2coum + glc-D + h	0	1	0	1	0	1	0	1	0	1
1673	ACGPID	N-acetylglucosaminylphosphatidylinositol deacetylase	[c] : acgpail_hs + h2o --> ac + gpail_hs	0	1	0	1	0	1	0	1	0	1
1674	B3GNT31g	UDP-GlcNAc:betaGal beta-1,3-N-acetylglucosaminyltransferase 3, Golgi apparatus	[g] : thcrm_hs + udpgal --> galthcrm_hs + h + udp	0	1	0	1	0	1	0	1	0	1
1675	B3GNT32g	UDP-GlcNAc:betaGal beta-1,3-N-acetylglucosaminyltransferase 3, Golgi apparatus	[g] : galthcrm_hs + udpgal --> galgalthcrm_hs + h + udp	0	1	0	1	0	1	0	1	0	1
1676	B3GNT33g	UDP-GlcNAc:betaGal beta-1,3-N-acetylglucosaminyltransferase 3, Golgi apparatus	[g] : galgalthcrm_hs + udpgal --> galgalgalthcrm_hs + h + udp	0	1	0	1	0	1	0	1	0	1
1677	B3GNT35g	UDP-GlcNAc:betaGal beta-1,3-N-acetylglucosaminyltransferase 3, Golgi apparatus	[g] : acglcgalgbside_hs + udpgal --> galacglcgalgbside_hs + h + udp	0	1	0	1	0	1	0	1	0	1
1678	B3GNT36g	UDP-GlcNAc:betaGal beta-1,3-N-acetylglucosaminyltransferase 3, Golgi apparatus	[g] : acgal + gbside_hs --> acgbgbside_hs + h2o	0	1	0	1	0	1	0	1	0	1
1679	FUT11g	Galactoside 2-alpha-L-fucosyltransferase 1	[g] : galgbside_hs + gdpfuc --> fucgalgbside_hs + gdp + h	0	1	0	1	0	1	0	1	0	1
1680	A4GALTg	Lactosylceramide 4-alpha-galactosyltransferase	[g] : galgluside_hs + udpgal --> h + thcrm_hs + udp	0	1	0	1	0	1	0	1	0	1
1681	NAGAly	N-acetylgalactosaminidase, alpha-	[l] : acgagbside_hs + h + udp --> gbside_hs + udpacgal	0	1	0	1	0	1	0	1	0	1
1682	GBGT1	globoside alpha-1,3-N-acetylgalactosaminyltransferase 1	[g] : gbside_hs + udpacgal --> acgagbside_hs + h + udp	0	1	0	1	0	1	0	1	0	1
1683	B3GALT3g	Beta-1,3-galactosyltransferase 3	[g] : thcrm_hs + udpacgal --> gbside_hs + h + udp	0	1	0	1	0	1	0	1	0	1
1684	B3GALT5g	Beta-1,3-galactosyltransferase 5	[g] : gbside_hs + udpgal --> galgbside_hs + h + udp	0	1	0	1	0	1	0	1	0	1
1685	SIAT4Bg	Beta-galactoside alpha-2,3-sialyltransferase, Golgi apparatus	[g] : cmpacna + galgbside_hs --> acngalgbside_hs + cmp + h	0	1	0	1	0	1	0	1	0	1
1686	ST8SIA11	Beta-galactoside alpha-2,3-sialyltransferase	[g] : acngalgbside_hs + cmpacna --> acnacngalgbside_hs + cmp + h	0	1	0	1	0	1	0	1	0	1
1687	ST8SIA12	Beta-galactoside alpha-2,3-sialyltransferase	[g] : cmpacna + gm3_hs --> cmp + gd3_hs + h	0	1	0	1	0	1	0	1	0	1
1688	ST8SIA51g	Beta-galactoside alpha-2,3-sialyltransferase	[g] : cmpacna + gd3_hs --> cmp + gt3_hs + h	0	1	0	1	0	1	0	1	0	1
1689	NMPTRCOX	N-Methylputrescine:oxygen oxidoreductase (deaminating)	[c] : nmptrc + o2 --> 1mpyr + h2o2 + nh4	0	1	0	1	0	1	0	1	0	1
1690	HBZOPT10m	Hydroxybenzoate Decaprenyltransferase	[m] : 4hbz + decdp --> 3dphb + ppi	0	1	0	1	0	1	0	1	0	1
1691	3DPHBH1	Hydroxylation of 3-Decaprenyl-4-hydroxybenzoate (NADH)	[m] : 3dphb + h + nadh + o2 --> 3dpdhb + h2o + nad	0	1	0	1	0	1	0	1	0	1
1692	3DPHBH2	Hydroxylation of 3-Decaprenyl-4-hydroxybenzoate (NADPH)	[m] : 3dphb + h + nadph + o2 --> 3dpdhb + h2o + nadp	0	1	0	1	0	1	0	1	0	1
1693	DHDPBMTm	dihydroxydecaprenylbenzoate methyltransferase	[m] : 3dpdhb + amet --> 3dpdhb_me + ahcys + h	0	1	0	1	0	1	0	1	0	1
1694	DPHMBDCm	3-Decaprenyl-4-hydroxy-5-methoxybenzoate decarboxylation	[m] : 3dpdhb_me + h --> 2dp6mep + co2	0	1	0	1	0	1	0	1	0	1
1695	SIAT9g	Lactosylceramide alpha-2,3-sialyltransferase, Golgi apparatus	[g] : cmpacna + galgluside_hs --> cmp + gm3_hs + h	0	1	0	1	0	1	0	1	0	1
1696	GALGT1	Beta-1,4 N-acetylgalactosaminyltransferase	[g] : galgluside_hs + udpacgal --> ga2_hs + h + udp	0	1	0	1	0	1	0	1	0	1
1697	GALGT2	Beta-1,4 N-acetylgalactosaminyltransferase	[g] : gm3_hs + udpacgal --> gm2_hs + h + udp	0	1	0	1	0	1	0	1	0	1
1698	GALGT3	Beta-1,4 N-acetylgalactosaminyltransferase	[g] : gd3_hs + udpacgal --> gd2_hs + h + udp	0	1	0	1	0	1	0	1	0	1
1699	GALGT4	Beta-1,4 N-acetylgalactosaminyltransferase	[g] : gt3_hs + udpacgal --> gt2_hs + h + udp	0	1	0	1	0	1	0	1	0	1
1700	ST6GALNAC21	Alpha-N-acetylgalactosaminide alpha-2,6-sialyltransferase 2	[g] : acngalgbside_hs + cmpacna --> acn13acngalgbside_hs + cmp + h	0	1	0	1	0	1	0	1	0	1
1701	ST6GALNAC22	Alpha-N-acetylgalactosaminide alpha-2,6-sialyltransferase 2	[g] : acngalgbside_hs + cmpacna --> acn23acngalgbside_hs + cmp + h	0	1	0	1	0	1	0	1	0	1
1702	ST6GALNAC23	Alpha-N-acetylgalactosaminide alpha-2,6-sialyltransferase 2	[g] : cmpacna + ga2_hs --> cmp + gm2a_hs + h	0	1	0	1	0	1	0	1	0	1
1703	ST6GALNAC24	Alpha-N-acetylgalactosaminide alpha-2,6-sialyltransferase 2	[g] : cmpacna + gm1a_hs --> cmp + gd1b2_hs + h	0	1	0	1	0	1	0	1	0	1
1704	ST6GALNAC25	Alpha-N-acetylgalactosaminide alpha-2,6-sialyltransferase 2	[g] : cmpacna + gd1alpha_hs --> cmp + gt1alpha_hs + h	0	1	0	1	0	1	0	1	0	1
1705	ST6GALNAC26	Alpha-N-acetylgalactosaminide alpha-2,6-sialyltransferase 2	[g] : cmpacna + gt1alpha_hs --> cmp + gq1balpha_hs + h	0	1	0	1	0	1	0	1	0	1
1706	ST6GALNAC27	Alpha-N-acetylgalactosaminide alpha-2,6-sialyltransferase 2	[g] : cmpacna + gt1c_hs --> cmp + gq1c_hs + h	0	1	0	1	0	1	0	1	0	1
1707	ST6GALNAC28	Alpha-N-acetylgalactosaminide alpha-2,6-sialyltransferase 2	[g] : cmpacna + gq1c_hs --> cmp + gp1c_hs + h	0	1	0	1	0	1	0	1	0	1
1708	COQ6m	Ubiquinone biosynthesis monooxgenase COQ6	[m] : 2dp6mep + o2 --> 2dp6mobq + h2o	0	1	0	1	0	1	0	1	0	1
1709	ST8SIA52g	Beta-galactoside alpha-2,3-sialyltransferase	[g] : cmpacna + gt1b_hs --> cmp + gq1b_hs + h	0	1	0	1	0	1	0	1	0	1
1710	ST8SIA53g	Beta-galactoside alpha-2,3-sialyltransferase	[g] : cmpacna + gd1a_hs --> cmp + gt1a_hs + h	0	1	0	1	0	1	0	1	0	1
1711	ST8SIA54g	Beta-galactoside alpha-2,3-sialyltransferase	[g] : cmpacna + gm1b_hs --> cmp + gd1c_hs + h	0	1	0	1	0	1	0	1	0	1
1712	B3GNT37g	UDP-GlcNAc:betaGal beta-1,3-N-acetylglucosaminyltransferase 3, Golgi apparatus	[g] : gm2a_hs + udpgal --> gm1a_hs + h + udp	0	1	0	1	0	1	0	1	0	1
1713	B3GNT34g	UDP-GlcNAc:betaGal beta-1,3-N-acetylglucosaminyltransferase 3, Golgi apparatus	[g] : galgbside_hs + uacgam --> acglcgalgbside_hs + h + udp	0	1	0	1	0	1	0	1	0	1
1714	ST6GALNAC31	Alpha-N-acetylgalactosaminide alpha-2,6-sialyltransferase 3	[g] : cmpacna + gm1b_hs --> cmp + gd1alpha_hs + h	0	1	0	1	0	1	0	1	0	1
1715	COQ5m	Ubiquinone biosynthesis methyltransferase COQ5	[m] : 2dp6mobq + amet --> 2dp6mobq_me + ahcys + h	0	1	0	1	0	1	0	1	0	1
1716	ST6GALNAC62	sialytransferase 7 ((alpha-N-acetylneuraminyl 2,3-betagalactosyl-1,3)-N-acetyl galactosaminide alpha-2,6-sialytransferase) F	[g] : cmpacna + gt1b_hs --> cmp + gq1balpha_hs + h	0	1	0	1	0	1	0	1	0	1
1717	ST3GAL21g	CMP-N-acetylneuraminate-beta-galactosamide-alpha-2,3-sialyltransferase, Golgi apparatus	[g] : cmpacna + ga1_hs --> cmp + gm1b_hs + h	0	1	0	1	0	1	0	1	0	1
1718	COQ7m	Ubiquinone biosynthesis COQ7	[m] : 2dp6mobq_me + h + nadph + o2 --> 2dpmhobq + h2o + nadp	0	1	0	1	0	1	0	1	0	1
1719	ST3GAL22g	CMP-N-acetylneuraminate-beta-galactosamide-alpha-2,3-sialyltransferase, Golgi apparatus	[g] : cmpacna + gm1_hs --> cmp + gd1a_hs + h	0	1	0	1	0	1	0	1	0	1
1720	COQ3m	methyltransferase COQ3	[m] : 2dpmhobq + amet --> ahcys + h + q10	0	1	0	1	0	1	0	1	0	1
1721	ST3GAL23g	CMP-N-acetylneuraminate-beta-galactosamide-alpha-2,3-sialyltransferase, Golgi apparatus	[g] : cmpacna + gd1b_hs --> cmp + gt1b_hs + h	0	1	0	1	0	1	0	1	0	1
1722	B3GALT41g	Beta-1,3-galactosyltransferase 4	[g] : ga2_hs + udpgal --> ga1_hs + h + udp	0	1	0	1	0	1	0	1	0	1
1723	B3GALT42g	Beta-1,3-galactosyltransferase 4	[g] : gm2_hs + udpgal --> gm1_hs + h + udp	0	1	0	1	0	1	0	1	0	1
1724	B3GALT43g	Beta-1,3-galactosyltransferase 4	[g] : gd2_hs + udpgal --> gd1b_hs + h + udp	0	1	0	1	0	1	0	1	0	1
1725	B3GALT44g	Beta-1,3-galactosyltransferase 4	[g] : gt2_hs + udpgal --> gt1c_hs + h + udp	0	1	0	1	0	1	0	1	0	1
1726	COKECBESr	Carboxylesterase (cocaine) (er)	[r] : coke + h2o --> bz + egme + h	0	1	0	1	0	1	0	1	0	1
1727	B3GNT38g	UDP-GlcNAc:betaGal beta-1,3-N-acetylglucosaminyltransferase 3, Golgi apparatus	[g] : galside_hs + udpgal --> digalside_hs + h + udp	0	1	0	1	0	1	0	1	0	1
1728	SMPD3l	sphingomyelin phosphodiesterase 3, neutral membrane (neutral sphingomyelinase II)	[l] : h2o + sphmyln_hs --> cholp + crm_hs + h	0	1	0	1	0	1	0	1	0	1
1729	SPHK21c	sphingosine kinase 2	[c] : atp + sphings --> adp + h + sphs1p	0	1	0	1	0	1	0	1	0	1
1730	DNDPt1m	dATP transport via ADP antiport	adp[m] + datp[c] --> adp[c] + datp[m]	0	1	0	1	0	1	0	1	0	1
1731	DNDPt2m	dATP transport via ATP antiport	atp[m] + datp[c] --> atp[c] + datp[m]	0	1	0	1	0	1	0	1	0	1
1732	DNDPt6m	dATP transport via dGDP antiport	datp[c] + dgdp[m] --> datp[m] + dgdp[c]	0	1	0	1	0	1	0	1	0	1
1733	DNDPt5m	dATP transport via dTDP antiport	datp[c] + dtdp[m] --> datp[m] + dtdp[c]	0	1	0	1	0	1	0	1	0	1
1734	DNDPt4m	dATP transport via dUDP antiport	datp[c] + dudp[m] --> datp[m] + dudp[c]	0	1	0	1	0	1	0	1	0	1
1735	DNDPt3m	dATP transport via dCDP antiport	datp[c] + dcdp[m] --> datp[m] + dcdp[c]	0	1	0	1	0	1	0	1	0	1
1736	DNDPt7m	dATP transport via dADP antiport	dadp[m] + datp[c] --> dadp[c] + datp[m]	0	1	0	1	0	1	0	1	0	1
1737	DNDPt8m	dADP transport via dUDP antiport	dadp[c] + dudp[m] --> dadp[m] + dudp[c]	0	1	0	1	0	1	0	1	0	1
1738	DNDPt9m	dADP transport via dTDP antiport	dadp[c] + dtdp[m] --> dadp[m] + dtdp[c]	0	1	0	1	0	1	0	1	0	1
1739	DNDPt10m	dADP transport via dCDP antiport	dadp[c] + dcdp[m] --> dadp[m] + dcdp[c]	0	1	0	1	0	1	0	1	0	1
1740	DNDPt11m	dADP transport via dGDP antiport	dadp[c] + dgdp[m] --> dadp[m] + dgdp[c]	0	1	0	1	0	1	0	1	0	1
1741	DNDPt12m	dADP transport via ADP antiport	adp[m] + dadp[c] --> adp[c] + dadp[m]	0	1	0	1	0	1	0	1	0	1
1742	DNDPt13m	dADP transport via ATP antiport	atp[m] + dadp[c] --> atp[c] + dadp[m]	0	1	0	1	0	1	0	1	0	1
1743	DNDPt14m	dUDP transport via dTDP antiport	dtdp[m] + dudp[c] --> dtdp[c] + dudp[m]	0	1	0	1	0	1	0	1	0	1
1744	DNDPt15m	dUDP transport via dGDP antiport	dgdp[m] + dudp[c] --> dgdp[c] + dudp[m]	0	1	0	1	0	1	0	1	0	1
1745	DNDPt16m	dUDP transport via dADP antiport	dadp[m] + dudp[c] --> dadp[c] + dudp[m]	0	1	0	1	0	1	0	1	0	1
1746	SBPP3er	sphingoid base-phosphate phosphatase (sphinganine 1-phosphatase), endoplasmic reticulum	[r] : h2o + sphs1p --> pi + sphings	0	1	0	1	0	1	0	1	0	1
1747	DNDPt17m	dUDP transport via dCDP antiport	dcdp[m] + dudp[c] --> dcdp[c] + dudp[m]	0	1	0	1	0	1	0	1	0	1
1748	DNDPt18m	dUDP transport via ADP antiport	adp[m] + dudp[c] --> adp[c] + dudp[m]	0	1	0	1	0	1	0	1	0	1
1749	DNDPt19m	dUDP transport via ATP antiport	atp[m] + dudp[c] --> atp[c] + dudp[m]	0	1	0	1	0	1	0	1	0	1
1750	GAL3ST11	Galactosylceramide sulfotransferase	[g] : galside_hs + paps --> h + pap + sgalside_hs	0	1	0	1	0	1	0	1	0	1
1751	GAL3ST12	Galactosylceramide sulfotransferase	[g] : digalside_hs + paps --> digalsgalside_hs + h + pap	0	1	0	1	0	1	0	1	0	1
1752	ARSA	Arylsulfatase A	[l] : h2o + sgalside_hs --> galside_hs + h + so4	0	1	0	1	0	1	0	1	0	1
1753	CERK	Ceramide kinase	[c] : atp + crm_hs --> adp + crmp_hs + h	0	1	0	1	0	1	0	1	0	1
1754	DNDPt20m	dTDP transport via ATP antiport	atp[m] + dtdp[c] --> atp[c] + dtdp[m]	0	1	0	1	0	1	0	1	0	1
1755	DNDPt21m	dTDP transport via ADP antiport	adp[m] + dtdp[c] --> adp[c] + dtdp[m]	0	1	0	1	0	1	0	1	0	1
1756	DNDPt22m	dTDP transport via dUDP antiport	dtdp[c] + dudp[m] --> dtdp[m] + dudp[c]	0	1	0	1	0	1	0	1	0	1
1757	DNDPt23m	dTDP transport via dGTP antiport	dgdp[m] + dtdp[c] --> dgdp[c] + dtdp[m]	0	1	0	1	0	1	0	1	0	1
1758	DNDPt24m	dTDP transport via dADP antiport	dadp[m] + dtdp[c] --> dadp[c] + dtdp[m]	0	1	0	1	0	1	0	1	0	1
1759	DNDPt25m	dTDP transport via dCDP antiport	dcdp[m] + dtdp[c] --> dcdp[c] + dtdp[m]	0	1	0	1	0	1	0	1	0	1
1760	DNDPt26m	dCDP transport via dUDP antiport	dcdp[c] + dudp[m] --> dcdp[m] + dudp[c]	0	1	0	1	0	1	0	1	0	1
1761	DNDPt27m	dCDP transport via dTDP antiport	dcdp[c] + dtdp[m] --> dcdp[m] + dtdp[c]	0	1	0	1	0	1	0	1	0	1
1762	DNDPt28m	dCDP transport via dGDP antiport	dcdp[c] + dgdp[m] --> dcdp[m] + dgdp[c]	0	1	0	1	0	1	0	1	0	1
1763	DNDPt29m	dCDP transport via dADP antiport	dadp[m] + dcdp[c] --> dadp[c] + dcdp[m]	0	1	0	1	0	1	0	1	0	1
1764	DNDPt30m	dCDP transport via ADP antiport	adp[m] + dcdp[c] --> adp[c] + dcdp[m]	0	1	0	1	0	1	0	1	0	1
1765	DNDPt31m	dCDP transport via ATP antiport	atp[m] + dcdp[c] --> atp[c] + dcdp[m]	0	1	0	1	0	1	0	1	0	1
1766	DNDPt32m	dGDP transport via ATP antiport	atp[m] + dgdp[c] --> atp[c] + dgdp[m]	0	1	0	1	0	1	0	1	0	1
1767	DNDPt33m	dGDP transport via dUDP antiport	dgdp[c] + dudp[m] --> dgdp[m] + dudp[c]	0	1	0	1	0	1	0	1	0	1
1768	DNDPt34m	dGDP transport via dTDP antiport	dgdp[c] + dtdp[m] --> dgdp[m] + dtdp[c]	0	1	0	1	0	1	0	1	0	1
1769	DNDPt35m	dGDP transport via dADP antiport	dadp[m] + dgdp[c] --> dadp[c] + dgdp[m]	0	1	0	1	0	1	0	1	0	1
1770	DNDPt36m	dGDP transport via dCDP antiport	dcdp[m] + dgdp[c] --> dcdp[c] + dgdp[m]	0	1	0	1	0	1	0	1	0	1
1771	DNDPt37m	dUTP transport via dTDP antiport	dtdp[m] + dutp[c] --> dtdp[c] + dutp[m]	0	1	0	1	0	1	0	1	0	1
1772	DNDPt38m	dUTP transport via dUDP antiport	dudp[m] + dutp[c] --> dudp[c] + dutp[m]	0	1	0	1	0	1	0	1	0	1
1773	DNDPt39m	dUTP transport via dGDP antiport	dgdp[m] + dutp[c] --> dgdp[c] + dutp[m]	0	1	0	1	0	1	0	1	0	1
1774	DNDPt40m	dUTP transport via dADP antiport	dadp[m] + dutp[c] --> dadp[c] + dutp[m]	0	1	0	1	0	1	0	1	0	1
1775	DNDPt41m	dUTP transport via dCDP antiport	dcdp[m] + dutp[c] --> dcdp[c] + dutp[m]	0	1	0	1	0	1	0	1	0	1
1776	DNDPt42m	dUTP transport via ADP antiport	adp[m] + dutp[c] --> adp[c] + dutp[m]	0	1	0	1	0	1	0	1	0	1
1777	DNDPt43m	dUTP transport via ATP antiport	atp[m] + dutp[c] --> atp[c] + dutp[m]	0	1	0	1	0	1	0	1	0	1
1778	DNDPt44m	dTTP transport via ATP antiport	atp[m] + dttp[c] --> atp[c] + dttp[m]	0	1	0	1	0	1	0	1	0	1
1779	DNDPt45m	dTTP transport via ADP antiport	adp[m] + dttp[c] --> adp[c] + dttp[m]	0	1	0	1	0	1	0	1	0	1
1780	DNDPt46m	dTTP transport via dUDP antiport	dttp[c] + dudp[m] --> dttp[m] + dudp[c]	0	1	0	1	0	1	0	1	0	1
1781	DNDPt47m	dTTP transport via dTDP antiport	dtdp[m] + dttp[c] --> dtdp[c] + dttp[m]	0	1	0	1	0	1	0	1	0	1
1782	DNDPt48m	dTTP transport via dGDP antiport	dgdp[m] + dttp[c] --> dgdp[c] + dttp[m]	0	1	0	1	0	1	0	1	0	1
1783	DNDPt49m	dTTP transport via dADP antiport	dadp[m] + dttp[c] --> dadp[c] + dttp[m]	0	1	0	1	0	1	0	1	0	1
1784	DNDPt50m	dTTP transport via dCDP antiport	dcdp[m] + dttp[c] --> dcdp[c] + dttp[m]	0	1	0	1	0	1	0	1	0	1
1785	DNDPt51m	dCTP transport via dCDP antiport	dcdp[m] + dctp[c] --> dcdp[c] + dctp[m]	0	1	0	1	0	1	0	1	0	1
1786	DNDPt52m	dCTP transport via dUDP antiport	dctp[c] + dudp[m] --> dctp[m] + dudp[c]	0	1	0	1	0	1	0	1	0	1
1787	DNDPt53m	dCTP transport via dGDP antiport	dctp[c] + dgdp[m] --> dctp[m] + dgdp[c]	0	1	0	1	0	1	0	1	0	1
1788	DNDPt54m	dCTP transport via dADP antiport	dadp[m] + dctp[c] --> dadp[c] + dctp[m]	0	1	0	1	0	1	0	1	0	1
1789	DNDPt55m	dCTP transport via ADP antiport	adp[m] + dctp[c] --> adp[c] + dctp[m]	0	1	0	1	0	1	0	1	0	1
1790	DNDPt56m	dCTP transport via ATP antiport	atp[m] + dctp[c] --> atp[c] + dctp[m]	0	1	0	1	0	1	0	1	0	1
1791	DNDPt57m	dGTP transport via ATP antiport	atp[m] + dgtp[c] --> atp[c] + dgtp[m]	0	1	0	1	0	1	0	1	0	1
1792	DNDPt58m	dGTP transport via ADP antiport	adp[m] + dgtp[c] --> adp[c] + dgtp[m]	0	1	0	1	0	1	0	1	0	1
1793	DNDPt59m	dGTP transport via dADP antiport	dadp[m] + dgtp[c] --> dadp[c] + dgtp[m]	0	1	0	1	0	1	0	1	0	1
1794	DNDPt60m	dGTP transport via dUDP antiport	dgtp[c] + dudp[m] --> dgtp[m] + dudp[c]	0	1	0	1	0	1	0	1	0	1
1795	DNDPt61m	dGTP transport via dTDP antiport	dgtp[c] + dtdp[m] --> dgtp[m] + dtdp[c]	0	1	0	1	0	1	0	1	0	1
1796	DNDPt62m	dGTP transport via dGDP antiport	dgdp[m] + dgtp[c] --> dgdp[c] + dgtp[m]	0	1	0	1	0	1	0	1	0	1
1797	DNDPt63m	dGTP transport via dCDP antiport	dcdp[m] + dgtp[c] --> dcdp[c] + dgtp[m]	0	1	0	1	0	1	0	1	0	1
1798	UGCG	Ceramide glucosyltransferase	[r] : crm_hs + udpg --> gluside_hs + h + udp	0	1	0	1	0	1	0	1	0	1
1799	GBAl	Glucosylceramidase	[l] : gluside_hs + h2o --> crm_hs + glc-D	0	1	0	1	0	1	0	1	0	1
1800	GALC	Galactocerebrosidase	[l] : galside_hs + h2o --> crm_hs + gal	0	1	0	1	0	1	0	1	0	1
1801	B3GNT39g	UDP-GlcNAc:betaGal beta-1,3-N-acetylglucosaminyltransferase 3, Golgi apparatus	[g] : gluside_hs + udpgal --> galgluside_hs + h + udp	0	1	0	1	0	1	0	1	0	1
1802	GLB1	Beta-galactosidase	[l] : galgluside_hs + h2o --> gal + gluside_hs	0	1	0	1	0	1	0	1	0	1
1803	SGPL11r	Sphingosine-1-phosphate lyase 1	[r] : sph1p --> ethamp + hxdcal	0	1	0	1	0	1	0	1	0	1
1804	GLAl	galactosidase, alpha	[l] : digalside_hs + h2o --> gal + galside_hs	0	1	0	1	0	1	0	1	0	1
1805	PDE4n	3',5'-cyclic-nucleotide phosphodiesterase, Nucleus	[n] : 35cgmp + h2o --> gmp + h	0	1	0	1	0	1	0	1	0	1
1806	SMPD3g	sphingomyelin phosphodiesterase 3, neutral membrane (neutral sphingomyelinase II)	[g] : h2o + sphmyln_hs --> cholp + crm_hs + h	0	1	0	1	0	1	0	1	0	1
1807	GPIAT	glucosaminylphosphatidyl inositol acetyltransferase	[c] : gpail_hs + pmtcoa --> coa + gacpail_hs	0	1	0	1	0	1	0	1	0	1
1808	EGMESTr	ecgonine methyl esterase (ER)	[r] : egme + h2o --> ecgon + h + meoh	0	1	0	1	0	1	0	1	0	1
1809	GPIMTer_L	GlcN-acylPI mannosyltransferase, endoplasmic reticulum	[r] : (0.1) dolmanp_L + gacpail_hs --> (0.1) dolp_L + h + mgacpail_hs	0	1	0	1	0	1	0	1	0	1
1810	ECGISOr	Ecgonine isomerase (ER)	[r] : ecgon <==> pecgon	0	1	0	1	0	1	0	1	0	1
1811	H2MTer_L	H2 mannosyltransferase, endoplasmic reticulum	[r] : (0.1) dolmanp_L + mgacpail_hs --> (0.1) dolp_L + h + m2gacpail_hs	0	1	0	1	0	1	0	1	0	1
1812	PECGONCOATr	Pseudoecgonine CoA transferase (ER)	[r] : atp + coa + h + pecgon --> amp + pecgoncoa + ppi	0	1	0	1	0	1	0	1	0	1
1813	P5CRm	pyrroline-5-carboxylate reductase (m)	[m] : 1pyr5c + (2) h + nadph --> nadp + pro-L	3.58454	0.975873	4.96182	0.998679	4.98468	1	3.42624	0.985303	2.16126	0.999988
1814	P5CRxm	pyrroline-5-carboxylate reductase (m)	[m] : 1pyr5c + (2) h + nadh --> nad + pro-L	6.55267	0.952846	8.11011	0.999042	7.03269	0.995961	5.01911	0.973494	3.27819	1
1815	ST8SIA55g	Beta-galactoside alpha-2,3-sialyltransferase	[g] : cmpacna + gq1c_hs --> cmp + gp1calpha_hs + h	0	1	0	1	0	1	0	1	0	1
1816	GACPAILter	glucosaminyl-acylphosphatidylinositol ER flippase	gacpail_hs[c] --> gacpail_hs[r]	0	1	0	1	0	1	0	1	0	1
1817	2OXOADPTm	2-oxoadipate shuttle (cytosol/mitochondria)	2oxoadp[c] + akg[m] <==> 2oxoadp[m] + akg[c]	0	1	0	1	0.0018606	1	0.00391668	1	0.00509265	1
1818	2AMADPTm	L-2-aminoadipate shuttle (cytosol/mitochondria)	L2aadp[c] + akg[m] <==> L2aadp[m] + akg[c]	0	1	0	1	-0.0018606	1	-0.00391668	1	-0.00509265	1
1819	SPMDOX	Spermidine:(acceptor) oxidoreductase	[c] : h2o + o2 + spmd --> 13dampp + 4abutn + h2o2	0	1	0	1	0	1	0	1	0	1
1820	H2ETer	H2 phosphoethanolaminyl transferase, endoplasmic reticulum	[r] : mgacpail_hs + pe_hs --> dag_hs + emgacpail_hs	0	1	0	1	0	1	0	1	0	1
1821	H5MTer_L	H5 mannosyltransferase, endoplasmic reticulum	[r] : (0.1) dolmanp_L + emgacpail_hs --> (0.1) dolp_L + h + memgacpail_hs	0	1	0	1	0	1	0	1	0	1
1822	BMTer_L	B mannosyltransferase, endoplasmic reticulum	[r] : (0.1) dolmanp_L + memgacpail_hs --> (0.1) dolp_L + h + m2emgacpail_hs	0	1	0	1	0	1	0	1	0	1
1823	H3MTer_L	H3 mannosyltransferase, endoplasmic reticulum	[r] : (0.1) dolmanp_L + m2gacpail_hs --> (0.1) dolp_L + h + m3gacpail_hs	0	1	0	1	0	1	0	1	0	1
1824	H3ETer	H3 phosphoethanolaminyl transferase, endoplasmic reticulum	[r] : m2gacpail_hs + pe_hs --> dag_hs + memgacpail_hs	0	1	0	1	0	1	0	1	0	1
1825	H4ETer	H4 phosphoethanolaminyl transferase, endoplasmic reticulum	[r] : m3gacpail_hs + pe_hs --> dag_hs + m2emgacpail_hs	0	1	0	1	0	1	0	1	0	1
1826	H4ET3er	H4 phosphoethanolaminyl transferase, endoplasmic reticulum	[r] : m3gacpail_hs + pe_hs --> dag_hs + em3gacpail_hs	0	1	0	1	0	1	0	1	0	1
1827	H6'ET2er	H6' phosphoethanolaminyl transferase, endoplasmic reticulum	[r] : em3gacpail_hs + pe_hs --> dag_hs + emem2gacpail_hs	0	1	0	1	0	1	0	1	0	1
1828	H6'ETer	H6' phosphoethanolaminyl transferase, endoplasmic reticulum	[r] : em3gacpail_hs + pe_hs --> dag_hs + em2emgacpail_hs	0	1	0	1	0	1	0	1	0	1
1829	H6ET3er	H6 phosphoethanolaminyl transferase, endoplasmic reticulum	[r] : m2emgacpail_hs + pe_hs --> dag_hs + em2emgacpail_hs	0	1	0	1	0	1	0	1	0	1
1830	H7ET2er	H7 phosphoethanolaminyl transferase, endoplasmic reticulum	[r] : em2emgacpail_hs + pe_hs --> dag_hs + gpi_hs	0	1	0	1	0	1	0	1	0	1
1831	H7'ETer	H7' phosphoethanolaminyl transferase, endoplasmic reticulum	[r] : emem2gacpail_hs + pe_hs --> dag_hs + gpi_hs	0	1	0	1	0	1	0	1	0	1
1832	PVD3	Previtamin D3 formation	[c] : 7dhchsterol <==> pd3	0	1	0	1	0	1	0	1	0	1
1833	VD3	Vitamin D3 formation	[c] : pd3 <==> vitd3	0	1	0	1	0	1	0	1	0	1
1834	TS3	Tachysterol 3 formation	[c] : pd3 <==> ts3	0	1	0	1	0	1	0	1	0	1
1835	LS3	Lumisterol 3 formation	[c] : pd3 <==> lum3	0	1	0	1	0	1	0	1	0	1
1836	VITD3Hm	Vitamin D-25-hydroxylase (D3)	[m] : h + nadph + o2 + vitd3 --> 25hvitd3 + h2o + nadp	0	1	0	1	0	1	0	1	0	1
1837	VITD2Hm	Vitamin D-25-hydroxylase (D2)	[m] : h + nadph + o2 + vitd2 --> 25hvitd2 + h2o + nadp	0	1	0	1	0	1	0	1	0	1
1838	25VITD3Hm	1-alpha-Vitamin D-25-hydroxylase (D3)	[m] : 25hvitd3 + h + nadph + o2 --> 1a25dhvitd3 + h2o + nadp	0	1	0	1	0	1	0	1	0	1
1839	25VITD2Hm	1-alpha-Vitamin D-25-hydroxylase (D2)	[m] : 25hvitd2 + h + nadph + o2 --> 1a25dhvitd2 + h2o + nadp	0	1	0	1	0	1	0	1	0	1
1840	24,25VITD2Hm	24R-Vitamin D-25-hydroxylase (D2)	[m] : 25hvitd2 + h + nadph + o2 --> 2425dhvitd2 + h2o + nadp	0	1	0	1	0	1	0	1	0	1
1841	24,25VITD3Hm	24R-Vitamin D-25-hydroxylase (D3)	[m] : 25hvitd3 + h + nadph + o2 --> 2425dhvitd3 + h2o + nadp	0	1	0	1	0	1	0	1	0	1
1842	VITD2tm	Vitamin D2 transport from mitochondria	vitd2[m] <==> vitd2[c]	0	1	0	1	0	1	0	1	0	1
1843	VITD3tm	Vitamin D3 transport from mitochondria	vitd3[m] --> vitd3[c]	0	1	0	1	0	1	0	1	0	1
1844	H8TAer	H8 transamidase, endoplasmic reticulum	[r] : gpi_hs + pre_prot --> gpi_prot_hs + gpi_sig	0	1	0	1	0	1	0	1	0	1
1845	H7'TAer	H7' transamidase, endoplasmic reticulum	[r] : em2emgacpail_hs + pre_prot --> em2emgacpail_prot_hs + gpi_sig	0	1	0	1	0	1	0	1	0	1
1846	GPIDAer	glycophosphatidylinositol (GPI) deacylase, endoplasmic reticulum	[r] : gpi_prot_hs + h2o --> dgpi_prot_hs + h + hdca	0	1	0	1	0	1	0	1	0	1
1847	GPIDA2er	glycophosphatidylinositol (GPI) deacylase, endoplasmic reticulum	[r] : em2emgacpail_prot_hs + h2o --> dem2emgacpail_prot_hs + h + hdca	0	1	0	1	0	1	0	1	0	1
1848	M4CET3er	M4C phosphoethanolaminyl transferase, endoplasmic reticulum	[r] : m3emgacpail_hs + pe_hs --> dag_hs + mem2emgacpail_hs	0	1	0	1	0	1	0	1	0	1
1849	M4BET2er	M4B phosphoethanolaminyl transferase, endoplasmic reticulum	[r] : mem2emgacpail_hs + pe_hs --> dag_hs + m(em)3gacpail_hs	0	1	0	1	0	1	0	1	0	1
1850	H6MTer_L	H6 mannosyltransferase, endoplasmic reticulum	[r] : (0.1) dolmanp_L + m2emgacpail_hs --> (0.1) dolp_L + h + m3emgacpail_hs	0	1	0	1	0	1	0	1	0	1
1851	H7MTer_L	H7 mannosyltransferase, endoplasmic reticulum	[r] : (0.1) dolmanp_L + em2emgacpail_hs --> (0.1) dolp_L + h + mem2emgacpail_hs	0	1	0	1	0	1	0	1	0	1
1852	H8MTer_L	H8 mannosyltransferase, endoplasmic reticulum	[r] : (0.1) dolmanp_L + gpi_hs --> (0.1) dolp_L + h + m(em)3gacpail_hs	0	1	0	1	0	1	0	1	0	1
1853	M4BTAer	M4B transamidase, endoplasmic reticulum	[r] : mem2emgacpail_hs + pre_prot --> gpi_sig + mem2emgacpail_prot_hs	0	1	0	1	0	1	0	1	0	1
1854	M4ATAer	M4A transamidase, endoplasmic reticulum	[r] : m(em)3gacpail_hs + pre_prot --> gpi_sig + m(em)3gacpail_prot_hs	0	1	0	1	0	1	0	1	0	1
1855	BMTer_U	B mannosyltransferase, endoplasmic reticulum	[r] : (0.1) dolmanp_U + memgacpail_hs --> (0.1) dolp_U + h + m2emgacpail_hs	0	1	0	1	0	1	0	1	0	1
1856	GPIMTer_U	GlcN-acylPI mannosyltransferase, endoplasmic reticulum	[r] : (0.1) dolmanp_U + gacpail_hs --> (0.1) dolp_U + h + mgacpail_hs	0	1	0	1	0	1	0	1	0	1
1857	H2MTer_U	H2 mannosyltransferase, endoplasmic reticulum	[r] : (0.1) dolmanp_U + mgacpail_hs --> (0.1) dolp_U + h + m2gacpail_hs	0	1	0	1	0	1	0	1	0	1
1858	H3MTer_U	H3 mannosyltransferase, endoplasmic reticulum	[r] : (0.1) dolmanp_U + m2gacpail_hs --> (0.1) dolp_U + h + m3gacpail_hs	0	1	0	1	0	1	0	1	0	1
1859	H5MTer_U	H5 mannosyltransferase, endoplasmic reticulum	[r] : (0.1) dolmanp_U + emgacpail_hs --> (0.1) dolp_U + h + memgacpail_hs	0	1	0	1	0	1	0	1	0	1
1860	H6MTer_U	H6 mannosyltransferase, endoplasmic reticulum	[r] : (0.1) dolmanp_U + m2emgacpail_hs --> (0.1) dolp_U + h + m3emgacpail_hs	0	1	0	1	0	1	0	1	0	1
1861	H7MTer_U	H7 mannosyltransferase, endoplasmic reticulum	[r] : (0.1) dolmanp_U + em2emgacpail_hs --> (0.1) dolp_U + h + mem2emgacpail_hs	0	1	0	1	0	1	0	1	0	1
1862	H8MTer_U	H8 mannosyltransferase, endoplasmic reticulum	[r] : (0.1) dolmanp_U + gpi_hs --> (0.1) dolp_U + h + m(em)3gacpail_hs	0	1	0	1	0	1	0	1	0	1
1863	DNAMTSEn	DNA (cytosine-5-)-methyltransferase, nucleus	[n] : dna + seasmet --> dna5mtc + h + seahcys	0	1	0	1	0	1	0	1	0	1
1864	GAO1	Ganglioside O-acetylation	[c] : accoa + gd3_hs --> coa + oagd3_hs	0	1	0	1	0	1	0	1	0	1
1865	GAO2	Ganglioside O-acetylation	[c] : accoa + gt3_hs --> coa + oagt3_hs	0	1	0	1	0	1	0	1	0	1
1866	24,25DHVITD2tm	24,25-Dihydroxyvitamin D2 transport from mitochondria	2425dhvitd2[m] --> 2425dhvitd2[c]	0	1	0	1	0	1	0	1	0	1
1867	24,25DHVITD3tm	24,25-Dihydroxyvitamin D3 transport from mitochondria	2425dhvitd3[m] --> 2425dhvitd3[c]	0	1	0	1	0	1	0	1	0	1
1868	25HVITD2tm	25-hydroxyvitamin D2 transport from mitochondria	25hvitd2[m] --> 25hvitd2[c]	0	1	0	1	0	1	0	1	0	1
1869	25HVITD2tin-m	25-hydroxyvitamin D2 transport in mitochondria	25hvitd2[c] --> 25hvitd2[m]	0	1	0	1	0	1	0	1	0	1
1870	25HVITD3tin-m	25-hydroxyvitamin D3 transport in mitochondria	25hvitd3[c] --> 25hvitd3[m]	0	1	0	1	0	1	0	1	0	1
1871	25HVITD3tm	25-hydroxyvitamin D3 transport from mitochondria	25hvitd3[m] --> 25hvitd3[c]	0	1	0	1	0	1	0	1	0	1
1872	1a,24,25VITD2Hm	1-alpha-Vitamin D-24,25-hydroxylase (D2)	[m] : 2425dhvitd2 + h + nadph + o2 --> 1a2425thvitd2 + h2o + nadp	0	1	0	1	0	1	0	1	0	1
1873	1a,24,25VITD3Hm	1-alpha-Vitamin D-24,25-hydroxylase (D3)	[m] : 2425dhvitd3 + h + nadph + o2 --> 1a2425thvitd3 + h2o + nadp	0	1	0	1	0	1	0	1	0	1
1874	1a,25VITD2Hm	1-alpha,24R,25-Vitamin D-hydroxylase (D2)	[m] : 1a25dhvitd2 + h + nadph + o2 --> 1a2425thvitd2 + h2o + nadp	0	1	0	1	0	1	0	1	0	1
1875	1a,25VITD3Hm	1-alpha,24R,25-Vitamin D-hydroxylase (D3)	[m] : 1a25dhvitd3 + h + nadph + o2 --> 1a2425thvitd3 + h2o + nadp	0	1	0	1	0	1	0	1	0	1
1876	DOPAMT	Dopamine:amet O-methyltransferase	[c] : amet + dopa --> 3moxtyr + ahcys + h	0	1	0	1	0	1	0	1	0	1
1877	3MOXTYROX	3-Methoxytyramine:oxygen oxidoreductase (deaminating)	[c] : 3moxtyr + h2o + o2 --> 3mox4hpac + h2o2 + nh4	0	1	0	1	0	1	0	1	0	1
1878	34DHPHAMT	3,4-Dihydroxyphenylacetate:amet O-methyltransferase	[c] : 34dhpha + amet --> ahcys + h + homoval	0	1	0	1	0	1	0	1	0	1
1879	A4GALTc	Lactosylceramide 4-alpha-galactosyltransferase	[c] : galgluside_hs + udpgal --> h + thcrm_hs + udp	0	1	0	1	0	1	0	1	0	1
1880	S23T2g	beta-galactoside alpha-2,3-sialyltransferase (core 2)	[g] : cmpacna + core2 --> cmp + h + ksii_core2_pre1	0	1	0	1	0	1	0	1	0	1
1881	GBA	Glucosylceramidase	[c] : gluside_hs + h2o --> crm_hs + glc-D	0	1	0	1	0	1	0	1	0	1
1882	G14T2g	beta-N-acetylglucosaminylglycopeptide beta-1,4-galactosyltransferase, Golgi	[g] : ksii_core2_pre1 + udpgal --> h + ksii_core2_pre2 + udp	0	1	0	1	0	1	0	1	0	1
1883	SMS	Sphingomyelin synthase (homo sapiens)	[c] : crm_hs + pchol_hs --> dag_hs + sphmyln_hs	0	1	0	1	0	1	0	1	0	1
1884	CCA_D3tm	Calcitroic acid transport from mitochondria	cca_d3[m] --> cca_d3[c]	0	1	0	1	0	1	0	1	0	1
1885	ST6GALNAC61	sialytransferase 7 ((alpha-N-acetylneuraminyl 2,3-betagalactosyl-1,3)-N-acetyl galactosaminide alpha-2,6-sialytransferase) F	[g] : cmpacna + gd1a_hs --> cmp + gt1alpha_hs + h	0	1	0	1	0	1	0	1	0	1
1886	GHMT3	glycine hydroxymethyltransferase	[c] : 3htmelys + h --> 4tmeabut + gly	0	1	0	1	0	1	0	1	0	1
1887	GHMT3m	glycine hydroxymethyltransferase, mitochondrial	[m] : 3htmelys + h --> 4tmeabut + gly	0	1	0	1	0	1	0	1	0	1
1888	PCLYSOX	Procollagen-lysine 1, 2-oxoglutarate 5-dioxygenase	[c] : akg + o2 + pcollglys --> co2 + pcollg5hlys + succ	0	1	0	1	0	1	0	1	0	1
1889	S23T3g	beta-galactoside alpha-2,3-sialyltransferase (complex N-glycan)	[g] : cmpacna + l2fn2m2masn --> cmp + h + ksi_pre1	0	1	0	1	0	1	0	1	0	1
1890	AG13T4g	N-acetyllactosaminide beta-1,3-N-acetylglucosaminyltransferase, Golgi apparatus	[g] : ksi_pre1 + uacgam --> h + ksi_pre2 + udp	0	1	0	1	0	1	0	1	0	1
1891	PPOR	Phenylpyruvate:oxygen oxidoreductase (hydroxylating,decarboxylating)	[c] : o2 + phpyr --> 2hyoxplac + co2	0	1	0	1	0	1	0	1	0	1
1892	C3STDH1Pr	C-3 sterol dehydrogenase (4-methylzymosterol)	[r] : 4mzym_int1 + nadp --> 4mzym_int2 + co2 + h + nadph	0	1	0	1	0	1	0	1	0	1
1893	C4STMO2Pr	C-4 methyl sterol oxidase	[r] : 4mzym_int2 + nadp + o2 --> co2 + h + nadph + zym_int2	0	1	0	1	0	1	0	1	0	1
1894	ALOX5	Arachidonate 5-lipoxygenase	[c] : arachd + o2 --> 5HPET	0	1	0	1	0	1	0	1	0	1
1895	ALOX12	Arachidonate 12-lipoxygenase	[c] : arachd + o2 --> 12HPET	0	1	0	1	0	1	0	1	0	1
1896	ALOX12R	Arachidonate 12-lipoxygenase R	[c] : arachd + o2 --> 12RHPET	0	1	0	1	0	1	0	1	0	1
1897	AG13T1g	N-acetyllactosaminide beta-1,3-N-acetylglucosaminyltransferase, Golgi apparatus	[g] : ksii_core2_pre2 + uacgam --> h + ksii_core2_pre3 + udp	0	1	0	1	0	1	0	1	0	1
1898	G14T3g	beta-N-acetylglucosaminylglycopeptide beta-1,4-galactosyltransferase, Golgi	[g] : ksii_core2_pre3 + udpgal --> h + ksii_core2_pre4 + udp	0	1	0	1	0	1	0	1	0	1
1899	AG13T2g	N-acetyllactosaminide beta-1,3-N-acetylglucosaminyltransferase, Golgi apparatus	[g] : ksii_core2_pre4 + uacgam --> h + ksii_core2_pre5 + udp	0	1	0	1	0	1	0	1	0	1
1900	S6T1g	galactose/N-acetylglucosamine 6-O-sulfotransferase, Golgi apparatus	[g] : ksii_core2_pre5 + paps --> h + ksii_core2_pre6 + pap	0	1	0	1	0	1	0	1	0	1
1901	G14T4g	beta-N-acetylglucosaminylglycopeptide beta-1,4-galactosyltransferase, Golgi	[g] : ksii_core2_pre6 + udpgal --> h + ksii_core2_pre7 + udp	0	1	0	1	0	1	0	1	0	1
1902	AG13T3g	N-acetyllactosaminide beta-1,3-N-acetylglucosaminyltransferase, Golgi apparatus	[g] : ksii_core2_pre7 + uacgam --> h + ksii_core2_pre8 + udp	0	1	0	1	0	1	0	1	0	1
1903	S6T2g	galactose/N-acetylglucosamine 6-O-sulfotransferase, Golgi apparatus	[g] : ksii_core2_pre8 + paps --> h + ksii_core2_pre9 + pap	0	1	0	1	0	1	0	1	0	1
1904	G14T5g	beta-N-acetylglucosaminylglycopeptide beta-1,4-galactosyltransferase, Golgi	[g] : ksii_core2_pre9 + udpgal --> h + ksii_core2_pre10 + udp	0	1	0	1	0	1	0	1	0	1
1905	S6T3g	galactose/N-acetylglucosamine 6-O-sulfotransferase, Golgi apparatus	[g] : ksii_core2_pre10 + paps --> h + ksii_core2 + pap	0	1	0	1	0	1	0	1	0	1
1906	HSD11B2r	11-beta-hydroxysteroid dehydrogenase type 2	[r] : cortsn + h + nadh <==> crtsl + nad	0	1	0	1	0.00010168	1	6.62166e-05	1	9.50741e-05	1
1907	HSD11B1r	11-beta-hydroxysteroid dehydrogenase type 1	[r] : cortsn + h + nadph <==> crtsl + nadp	0	1	0	1	-0.00010168	1	-6.62166e-05	1	-9.50741e-05	1
1908	G14T6g	beta-N-acetylglucosaminylglycopeptide beta-1,4-galactosyltransferase, Golgi	[g] : ksi_pre2 + udpgal --> h + ksi_pre3 + udp	0	1	0	1	0	1	0	1	0	1
1909	AG13T5g	N-acetyllactosaminide beta-1,3-N-acetylglucosaminyltransferase, Golgi apparatus	[g] : ksi_pre3 + uacgam --> h + ksi_pre4 + udp	0	1	0	1	0	1	0	1	0	1
1910	S6T4g	galactose/N-acetylglucosamine 6-O-sulfotransferase, Golgi apparatus	[g] : ksi_pre4 + paps --> h + ksi_pre5 + pap	0	1	0	1	0	1	0	1	0	1
1911	G14T7g	beta-N-acetylglucosaminylglycopeptide beta-1,4-galactosyltransferase, Golgi	[g] : ksi_pre5 + udpgal --> h + ksi_pre6 + udp	0	1	0	1	0	1	0	1	0	1
1912	AG13T6g	N-acetyllactosaminide beta-1,3-N-acetylglucosaminyltransferase, Golgi apparatus	[g] : ksi_pre6 + uacgam --> h + ksi_pre7 + udp	0	1	0	1	0	1	0	1	0	1
1913	AG13T7g	N-acetyllactosaminide beta-1,3-N-acetylglucosaminyltransferase, Golgi apparatus	[g] : ksi_pre9 + uacgam --> h + ksi_pre10 + udp	0	1	0	1	0	1	0	1	0	1
1914	AG13T8g	N-acetyllactosaminide beta-1,3-N-acetylglucosaminyltransferase, Golgi apparatus	[g] : ksi_pre12 + uacgam --> h + ksi_pre13 + udp	0	1	0	1	0	1	0	1	0	1
1915	AG13T9g	N-acetyllactosaminide beta-1,3-N-acetylglucosaminyltransferase, Golgi apparatus	[g] : ksi_pre15 + uacgam --> h + ksi_pre16 + udp	0	1	0	1	0	1	0	1	0	1
1916	AG13T10g	N-acetyllactosaminide beta-1,3-N-acetylglucosaminyltransferase, Golgi apparatus	[g] : ksi_pre18 + uacgam --> h + ksi_pre19 + udp	0	1	0	1	0	1	0	1	0	1
1917	AG13T11g	N-acetyllactosaminide beta-1,3-N-acetylglucosaminyltransferase, Golgi apparatus	[g] : ksi_pre21 + uacgam --> h + ksi_pre22 + udp	0	1	0	1	0	1	0	1	0	1
1918	AG13T12g	N-acetyllactosaminide beta-1,3-N-acetylglucosaminyltransferase, Golgi apparatus	[g] : ksi_pre24 + uacgam --> h + ksi_pre25 + udp	0	1	0	1	0	1	0	1	0	1
1919	AG13T13g	N-acetyllactosaminide beta-1,3-N-acetylglucosaminyltransferase, Golgi apparatus	[g] : ksi_pre27 + uacgam --> h + ksi_pre28 + udp	0	1	0	1	0	1	0	1	0	1
1920	AG13T14g	N-acetyllactosaminide beta-1,3-N-acetylglucosaminyltransferase, Golgi apparatus	[g] : ksi_pre30 + uacgam --> h + ksi_pre31 + udp	0	1	0	1	0	1	0	1	0	1
1921	AG13T15g	N-acetyllactosaminide beta-1,3-N-acetylglucosaminyltransferase, Golgi apparatus	[g] : ksi_pre33 + uacgam --> h + ksi_pre34 + udp	0	1	0	1	0	1	0	1	0	1
1922	G14T8g	beta-N-acetylglucosaminylglycopeptide beta-1,4-galactosyltransferase, Golgi	[g] : ksi_pre8 + udpgal --> h + ksi_pre9 + udp	0	1	0	1	0	1	0	1	0	1
1923	G14T9g	beta-N-acetylglucosaminylglycopeptide beta-1,4-galactosyltransferase, Golgi	[g] : ksi_pre11 + udpgal --> h + ksi_pre12 + udp	0	1	0	1	0	1	0	1	0	1
1924	G14T10g	beta-N-acetylglucosaminylglycopeptide beta-1,4-galactosyltransferase, Golgi	[g] : ksi_pre14 + udpgal --> h + ksi_pre15 + udp	0	1	0	1	0	1	0	1	0	1
1925	G14T11g	beta-N-acetylglucosaminylglycopeptide beta-1,4-galactosyltransferase, Golgi	[g] : ksi_pre17 + udpgal --> h + ksi_pre18 + udp	0	1	0	1	0	1	0	1	0	1
1926	G14T12g	beta-N-acetylglucosaminylglycopeptide beta-1,4-galactosyltransferase, Golgi	[g] : ksi_pre20 + udpgal --> h + ksi_pre21 + udp	0	1	0	1	0	1	0	1	0	1
1927	G14T13g	beta-N-acetylglucosaminylglycopeptide beta-1,4-galactosyltransferase, Golgi	[g] : ksi_pre23 + udpgal --> h + ksi_pre24 + udp	0	1	0	1	0	1	0	1	0	1
1928	G14T14g	beta-N-acetylglucosaminylglycopeptide beta-1,4-galactosyltransferase, Golgi	[g] : ksi_pre26 + udpgal --> h + ksi_pre27 + udp	0	1	0	1	0	1	0	1	0	1
1929	G14T15g	beta-N-acetylglucosaminylglycopeptide beta-1,4-galactosyltransferase, Golgi	[g] : ksi_pre29 + udpgal --> h + ksi_pre30 + udp	0	1	0	1	0	1	0	1	0	1
1930	G14T16g	beta-N-acetylglucosaminylglycopeptide beta-1,4-galactosyltransferase, Golgi	[g] : ksi_pre32 + udpgal --> h + ksi_pre33 + udp	0	1	0	1	0	1	0	1	0	1
1931	G14T17g	beta-N-acetylglucosaminylglycopeptide beta-1,4-galactosyltransferase, Golgi	[g] : ksi_pre35 + udpgal --> h + ksi_pre36 + udp	0	1	0	1	0	1	0	1	0	1
1932	S6T5g	galactose/N-acetylglucosamine 6-O-sulfotransferase, Golgi apparatus	[g] : ksi_pre7 + paps --> h + ksi_pre8 + pap	0	1	0	1	0	1	0	1	0	1
1933	S6T6g	galactose/N-acetylglucosamine 6-O-sulfotransferase, Golgi apparatus	[g] : ksi_pre10 + paps --> h + ksi_pre11 + pap	0	1	0	1	0	1	0	1	0	1
1934	S6T7g	galactose/N-acetylglucosamine 6-O-sulfotransferase, Golgi apparatus	[g] : ksi_pre13 + paps --> h + ksi_pre14 + pap	0	1	0	1	0	1	0	1	0	1
1935	S6T8g	galactose/N-acetylglucosamine 6-O-sulfotransferase, Golgi apparatus	[g] : ksi_pre16 + paps --> h + ksi_pre17 + pap	0	1	0	1	0	1	0	1	0	1
1936	S6T9g	galactose/N-acetylglucosamine 6-O-sulfotransferase, Golgi apparatus	[g] : ksi_pre19 + paps --> h + ksi_pre20 + pap	0	1	0	1	0	1	0	1	0	1
1937	S6T10g	galactose/N-acetylglucosamine 6-O-sulfotransferase, Golgi apparatus	[g] : ksi_pre22 + paps --> h + ksi_pre23 + pap	0	1	0	1	0	1	0	1	0	1
1938	S6T11g	galactose/N-acetylglucosamine 6-O-sulfotransferase, Golgi apparatus	[g] : ksi_pre25 + paps --> h + ksi_pre26 + pap	0	1	0	1	0	1	0	1	0	1
1939	S6T12g	galactose/N-acetylglucosamine 6-O-sulfotransferase, Golgi apparatus	[g] : ksi_pre28 + paps --> h + ksi_pre29 + pap	0	1	0	1	0	1	0	1	0	1
1940	S6T13g	galactose/N-acetylglucosamine 6-O-sulfotransferase, Golgi apparatus	[g] : ksi_pre31 + paps --> h + ksi_pre32 + pap	0	1	0	1	0	1	0	1	0	1
1941	S6T14g	galactose/N-acetylglucosamine 6-O-sulfotransferase, Golgi apparatus	[g] : ksi_pre34 + paps --> h + ksi_pre35 + pap	0	1	0	1	0	1	0	1	0	1
1942	S6T15g	galactose/N-acetylglucosamine 6-O-sulfotransferase, Golgi apparatus	[g] : ksi_pre36 + paps --> h + ksi + pap	0	1	0	1	0	1	0	1	0	1
1943	3SPYRSP	3-sulfinopyruvate hydrolase (spotaneous reaction)	[c] : 3snpyr + h2o --> h + pyr + so3	0	1	0	1	0	1	0	1	0	1
1944	ARGDCm	arginine decarboxylase (m)	[m] : arg-L + h --> agm + co2	0	1	0	1	0	1	0	1	0	1
1945	AASAD3m	L-aminoadipate-semialdehyde dehydrogenase (NADH), mitochondrial	[m] : L2aadp6sa + h2o + nad --> L2aadp + (2) h + nadh	0	1	0	1	0.0018606	1	0.00391668	1	0.00509265	1
1946	SEASMETtn	Se-adenosyl-seleno-L-methionine nuclear transport	seasmet[c] <==> seasmet[n]	0	1	0	1	0	1	0	1	0	1
1947	SEAHCYStn	Se-adenosyl-seleno-L-homocysteine nuclear transport	seahcys[c] <==> seahcys[n]	0	1	0	1	0	1	0	1	0	1
1948	DALAOXx	D-Alanine Oxidase (x)	[x] : ala-D + h2o + o2 --> h2o2 + nh4 + pyr	0	1	0	1	0	1	0	1	0.0245725	1
1949	DALAxt	D-Alanine transport to perixosome	ala-D[c] --> ala-D[x]	0	1	0	1	0	1	0	1	0.0245725	1
1950	TAURtcx	taurine transport (sodium symport) (cytosol to peroxisome)	na1[c] + taur[c] <==> na1[x] + taur[x]	0	1	0	1	0	1	0	1	0	1
1951	G14T18g	beta-N-acetylglucosaminylglycopeptide beta-1,4-galactosyltransferase, Golgi	[g] : core4 + (2) udpgal --> (2) h + ksii_core4_pre1 + (2) udp	0	1	0	1	0	1	0	1	0	1
1952	S23T4g	beta-galactoside alpha-2,3-sialyltransferase	[g] : cmpacna + ksii_core4_pre1 --> cmp + h + ksii_core4_pre2	0	1	0	1	0	1	0	1	0	1
1953	AG13T16g	N-acetyllactosaminide beta-1,3-N-acetylglucosaminyltransferase, Golgi apparatus	[g] : ksii_core4_pre2 + uacgam --> h + ksii_core4_pre3 + udp	0	1	0	1	0	1	0	1	0	1
1954	G14T19g	beta-N-acetylglucosaminylglycopeptide beta-1,4-galactosyltransferase, Golgi	[g] : ksii_core4_pre3 + udpgal --> h + ksii_core4_pre4 + udp	0	1	0	1	0	1	0	1	0	1
1955	AG13T17g	N-acetyllactosaminide beta-1,3-N-acetylglucosaminyltransferase, Golgi apparatus	[g] : ksii_core4_pre4 + uacgam --> h + ksii_core4_pre5 + udp	0	1	0	1	0	1	0	1	0	1
1956	S6T16g	galactose/N-acetylglucosamine 6-O-sulfotransferase, Golgi apparatus	[g] : ksii_core4_pre5 + paps --> h + ksii_core4_pre6 + pap	0	1	0	1	0	1	0	1	0	1
1957	G14T20g	beta-N-acetylglucosaminylglycopeptide beta-1,4-galactosyltransferase, Golgi	[g] : ksii_core4_pre6 + udpgal --> h + ksii_core4_pre7 + udp	0	1	0	1	0	1	0	1	0	1
1958	AG13T18g	N-acetyllactosaminide beta-1,3-N-acetylglucosaminyltransferase, Golgi apparatus	[g] : ksii_core4_pre7 + uacgam --> h + ksii_core4_pre8 + udp	0	1	0	1	0	1	0	1	0	1
1959	S6T17g	galactose/N-acetylglucosamine 6-O-sulfotransferase, Golgi apparatus	[g] : ksii_core4_pre8 + paps --> h + ksii_core4_pre9 + pap	0	1	0	1	0	1	0	1	0	1
1960	G14T21g	beta-N-acetylglucosaminylglycopeptide beta-1,4-galactosyltransferase, Golgi	[g] : ksii_core4_pre9 + udpgal --> h + ksii_core4_pre10 + udp	0	1	0	1	0	1	0	1	0	1
1961	S6T18g	galactose/N-acetylglucosamine 6-O-sulfotransferase, Golgi apparatus	[g] : ksii_core4_pre10 + paps --> h + ksii_core4 + pap	0	1	0	1	0	1	0	1	0	1
1962	XYLTer	UDP-xylose:protein xylosyltransferase, endoplasmic reticulum	[r] : Ser-Gly/Ala-X-Gly + udpxyl --> h + udp + xser	0	1	0	1	0	1	0	1	0	1
1963	GALTg	UDP-D-galactose:D-xylose galactosyltransferase, Golgi apparatus	[g] : udpgal + xser --> h + lxser + udp	0	1	0	1	0	1	0	1	0	1
1964	GALT2g	UDP-D-galactose:galactosylxylose galactosyltransferase, Golgi apparatus	[g] : lxser + udpgal --> h + l2xser + udp	0	1	0	1	0	1	0	1	0	1
1965	GLCATg	UDP-D-glucuronate:galactosylgalactosylxylose glucuronosyltransferase, Golgi apparatus	[g] : l2xser + udpglcur --> cs,hs_linkage + h + udp	0	1	0	1	0	1	0	1	0	1
1966	GALNACT1g	UDPGal-chondroitin acetylgalactosaminyltransferase I, Golgi	[g] : cs,hs_linkage + udpacgal --> cs_pre + h + udp	0	1	0	1	0	1	0	1	0	1
1967	S4T1g	chondroitin 4-sulfotransferase, Golgi apparatus	[g] : cs_pre + (2) paps --> cs_a,b,e_pre1 + (2) h + (2) pap	0	1	0	1	0	1	0	1	0	1
1968	GLCAT2g	chondroitin glucuronyltransferase II, Golgi apparatus	[g] : cs_a,b,e_pre1 + udpglcur --> cs_a,b_pre2 + h + udp	0	1	0	1	0	1	0	1	0	1
1969	GALNACT2g	uridine diphosphoacetylgalactosamine-chondroitin acetylgalactosaminyltransferase II, Golgi	[g] : cs_a,b_pre2 + uacgam --> cs_a,b_pre3 + h + udp	0	1	0	1	0	1	0	1	0	1
1970	S4T2g	chondroitin 4-sulfotransferase, Golgi apparatus	[g] : cs_a,b_pre3 + paps --> cspg_a + h + pap	0	1	0	1	0	1	0	1	0	1
1971	S6T19g	chondroitin 6-sulfotransferase, Golgi apparatus	[g] : cs_pre + (2) paps --> cs_c,d,e_pre1 + (2) h + (2) pap	0	1	0	1	0	1	0	1	0	1
1972	GLCAT3g	chondroitin glucuronyltransferase II, Golgi apparatus	[g] : cs_c,d,e_pre1 + udpglcur --> cs_c_pre2 + h + udp	0	1	0	1	0	1	0	1	0	1
1973	GALNACT3g	uridine diphosphoacetylgalactosamine-chondroitin acetylgalactosaminyltransferase II, Golgi	[g] : cs_c_pre2 + uacgam --> cs_c_pre3 + h + udp	0	1	0	1	0	1	0	1	0	1
1974	S6T20g	chondroitin 6-sulfotransferase, Golgi apparatus	[g] : cs_c_pre3 + paps --> cspg_c + h + pap	0	1	0	1	0	1	0	1	0	1
1975	S2T1g	chondroitin 2-sulfotransferase, Golgi	[g] : cs_c,d,e_pre1 + paps --> cs_d_pre2 + h + pap	0	1	0	1	0	1	0	1	0	1
1976	GLCAT4g	chondroitin glucuronyltransferase II, Golgi apparatus	[g] : cs_d_pre2 + udpglcur --> cs_d_pre3 + h + udp	0	1	0	1	0	1	0	1	0	1
1977	GALNACT4g	uridine diphosphoacetylgalactosamine-chondroitin acetylgalactosaminyltransferase II, Golgi	[g] : cs_d_pre3 + uacgam --> cs_d_pre4 + h + udp	0	1	0	1	0	1	0	1	0	1
1978	S6T21g	chondroitin 6-sulfotransferase, Golgi apparatus	[g] : cs_d_pre4 + paps --> cs_d_pre5 + h + pap	0	1	0	1	0	1	0	1	0	1
1979	S2T2g	chondroitin 2-sulfotransferase, Golgi	[g] : cs_d_pre5 + paps --> cspg_d + h + pap	0	1	0	1	0	1	0	1	0	1
1980	ETF	electron transfer flavoprotein	[m] : etfox + fadh2 --> etfrd + fad	1.27776	0.969856	1.07583	0.988921	0.755929	1	0.304407	0.958849	0.131028	0.985576
1981	ETFQO	Electron transfer flavoprotein-ubiquinone oxidoreductase	[m] : etfrd + q10 --> etfox + q10h2	1.27776	0.969856	1.07583	0.988921	0.755929	1	0.304407	0.958849	0.131028	0.985576
1982	34DHXMANDACOX	3,4-Dihydroxymandelaldehyde:NAD+ oxidoreductase	[c] : 34dhmald + h2o + nad --> 34dhoxmand + (2) h + nadh	0.130907	1	0.131487	1	0.204078	1	0.242908	1	0.198712	1
1983	34DHPLACOX	3,4-Dihydroxyphenylacetaldehyde:NAD+ oxidoreductase	[c] : 34dhpac + h2o + nad --> 34dhpha + (2) h + nadh	0.188959	1	0.327745	1	0.410842	1	0.28837	1	0.24348	1
1984	P4504F121r	cytochrome p450 4F12/4F2	[r] : arachd + h + nadph + o2 --> h2o + nadp + wharachd	0	1	0	1	0	1	0	1	0	1
1985	P4504F122r	cytochrome p450 4F12/4F2	[r] : h + leuktrB4 + nadph + o2 --> h2o + leuktrB4woh + nadp	0	1	0	1	0	1	0	1	0	1
1986	P4504F123r	cytochrome p450 4F12/4F2	[r] : ebastine + h + nadph + o2 --> ebastineoh + h2o + nadp	0	1	0	1	0	1	0	1	0	1
1987	P4504F81r	cytochrome p450 4F8	[r] : arachd + h + nadph + o2 --> 18harachd + h2o + nadp	0	1	0	1	0	1	0	1	0	1
1988	S6T22g	chondroitin 6-sulfotransferase, Golgi apparatus	[g] : cs_a,b,e_pre1 + (2) paps --> cs_e_pre2 + (2) h + (2) pap	0	1	0	1	0	1	0	1	0	1
1989	GLCAT5g	chondroitin glucuronyltransferase II, Golgi apparatus	[g] : cs_e_pre2 + udpglcur --> cs_e_pre3 + h + udp	0	1	0	1	0	1	0	1	0	1
1990	GALNACT5g	uridine diphosphoacetylgalactosamine-chondroitin acetylgalactosaminyltransferase II, Golgi	[g] : cs_e_pre3 + uacgam --> cs_e_pre4 + h + udp	0	1	0	1	0	1	0	1	0	1
1991	S4T3g	chondroitin 4-sulfotransferase, Golgi apparatus	[g] : cs_e_pre4 + paps --> cs_e_pre5a + h + pap	0	1	0	1	0	1	0	1	0	1
1992	S6T23g	chondroitin 6-sulfotransferase, Golgi apparatus	[g] : cs_e_pre5a + paps --> cspg_e + h + pap	0	1	0	1	0	1	0	1	0	1
1993	3MOX4HOXPGALDOX	3-Methoxy-4-hydroxyphenylglycolaldehyde:NAD+ oxidoreductase	[c] : 3m4hpga + h2o + nad --> 3mox4hoxm + (2) h + nadh	0.133195	1	0.147413	1	0.134761	1	0.0388914	1	0.0148261	1
1994	S4T4g	chondroitin 4-sulfotransferase, Golgi apparatus	[g] : cs_c,d,e_pre1 + (2) paps --> cs_e_pre2 + (2) h + (2) pap	0	1	0	1	0	1	0	1	0	1
1995	S4T5g	chondroitin 4-sulfotransferase, Golgi apparatus	[g] : cs_e_pre5b + paps --> cspg_e + h + pap	0	1	0	1	0	1	0	1	0	1
1996	S6T24g	chondroitin 6-sulfotransferase, Golgi apparatus	[g] : cs_e_pre4 + paps --> cs_e_pre5b + h + pap	0	1	0	1	0	1	0	1	0	1
1997	TYRCBOX	L-Tyrosine carboxy-lyase	[c] : h + tyr-L --> co2 + tym	0	1	0	1	0	1	0	1	0	1
1998	S4T6g	chondroitin 4-sulfotransferase, Golgi apparatus	[g] : cs_b_pre4 + paps --> cs_b_pre5 + h + pap	0	1	0	1	0	1	0	1	0	1
[truncated: 1,218 more rows]
